# Supplementary material for: CD34 defines melanocyte stem cell subpopulations with distinct regenerative properties
Source: PLoS Genet. 2019 Apr 24;15(4):e1008034. doi: 10.1371/journal.pgen.1008034 (PMC6481766; doi:10.1371/journal.pgen.1008034)
Supplement: S4 Table — The Excel file comprises of two separate spreadsheets: (a) with all gene counts and (b) without genes with zero counts for all six samples (3 CD34+ McSC samples and 3 CD34- McSC samples). (XLSX) [file pgen.1008034.s016.xlsx]

## Sheet: all count
ID	CD34plus_1	CD34plus_2	CD34plus_3	CD34minus_1	CD34minus_2	CD34minus_3
ENSMUSG00000000001	4081	4647	4481	4596	3846	4438
ENSMUSG00000000003	0	0	0	0	0	0
ENSMUSG00000000028	26	5	3	210	180	115
ENSMUSG00000000031	154	240	130	3	9	91
ENSMUSG00000000037	172	232	232	81	116	86
ENSMUSG00000000049	28	0	26	0	0	0
ENSMUSG00000000056	776	748	590	992	823	1051
ENSMUSG00000000058	2356	3769	3851	1402	1906	2455
ENSMUSG00000000078	17393	16710	20188	27370	25065	28455
ENSMUSG00000000085	1498	2100	2202	1112	1683	1636
ENSMUSG00000000088	284	693	472	870	775	735
ENSMUSG00000000093	353	333	898	3445	3918	3765
ENSMUSG00000000094	2	39	9	319	461	334
ENSMUSG00000000103	0	0	0	0	0	0
ENSMUSG00000000120	4727	5506	3616	221	576	496
ENSMUSG00000000125	3	123	243	16	206	302
ENSMUSG00000000126	470	540	500	90	54	196
ENSMUSG00000000127	810	1078	1098	645	1025	834
ENSMUSG00000000131	2014	2723	2401	5767	4710	5061
ENSMUSG00000000134	1356	1975	2221	1615	1791	2109
ENSMUSG00000000142	2558	2004	2725	6140	6287	7024
ENSMUSG00000000148	764	1184	698	1308	1043	972
ENSMUSG00000000149	1637	2672	2187	1633	2111	1958
ENSMUSG00000000154	31	143	142	25	37	127
ENSMUSG00000000157	0	7	0	0	1	0
ENSMUSG00000000159	0	0	0	0	0	0
ENSMUSG00000000167	14	1	1	34	15	36
ENSMUSG00000000168	832	1667	1885	2367	2064	2395
ENSMUSG00000000171	670	1454	1282	1448	1450	1094
ENSMUSG00000000182	61	0	0	0	0	0
ENSMUSG00000000183	0	0	0	0	0	0
ENSMUSG00000000184	5319	5881	5829	2681	3300	3767
ENSMUSG00000000194	1779	2587	2530	1973	2308	2349
ENSMUSG00000000197	223	276	82	133	180	193
ENSMUSG00000000202	0	0	43	0	0	0
ENSMUSG00000000204	4017	4318	2766	24	113	198
ENSMUSG00000000214	0	0	0	0	0	0
ENSMUSG00000000215	0	0	0	0	0	0
ENSMUSG00000000216	89	78	399	11	101	119
ENSMUSG00000000223	459	839	677	104	364	258
ENSMUSG00000000244	51	4	184	20	27	17
ENSMUSG00000000247	1348	1676	3177	505	1361	1804
ENSMUSG00000000248	0	0	0	0	0	0
ENSMUSG00000000253	301	179	86	2	13	85
ENSMUSG00000000263	0	0	0	0	0	0
ENSMUSG00000000266	1102	1546	1719	2953	2439	3662
ENSMUSG00000000275	2892	3169	2890	1655	2015	2012
ENSMUSG00000000276	662	742	647	858	759	892
ENSMUSG00000000278	3275	4193	4006	5862	6634	5730
ENSMUSG00000000282	1274	1769	1839	3860	3626	3774
ENSMUSG00000000290	102	335	447	15	34	46
ENSMUSG00000000295	175	40	163	108	156	200
ENSMUSG00000000296	0	26	29	173	156	161
ENSMUSG00000000301	0	39	55	65	40	62
ENSMUSG00000000303	1910	2844	5077	16102	17374	16416
ENSMUSG00000000305	549	258	235	206	477	391
ENSMUSG00000000308	717	1196	1804	589	1235	1201
ENSMUSG00000000317	615	971	972	47	179	205
ENSMUSG00000000318	87	149	145	1	1	0
ENSMUSG00000000320	63	76	65	0	18	22
ENSMUSG00000000325	75	0	2	45	53	18
ENSMUSG00000000326	0	0	0	0	0	0
ENSMUSG00000000339	897	697	842	1218	872	905
ENSMUSG00000000340	402	740	631	772	642	889
ENSMUSG00000000346	3546	4692	5913	5840	6709	7202
ENSMUSG00000000355	258	574	472	728	549	936
ENSMUSG00000000359	478	544	299	4	46	77
ENSMUSG00000000365	0	0	0	3	1	1
ENSMUSG00000000374	1638	2483	2468	3611	3713	4421
ENSMUSG00000000378	792	1139	1132	969	1291	927
ENSMUSG00000000381	0	0	0	0	0	0
ENSMUSG00000000384	849	802	795	1195	1475	1403
ENSMUSG00000000385	1	18	1	7	41	30
ENSMUSG00000000386	43	86	79	1074	853	927
ENSMUSG00000000392	1608	2119	1480	23	71	65
ENSMUSG00000000394	142	62	240	1	2	2
ENSMUSG00000000399	1164	1384	1685	2169	2665	2127
ENSMUSG00000000402	81	254	383	55	75	95
ENSMUSG00000000409	149	179	67	234	99	202
ENSMUSG00000000411	0	0	0	0	0	0
ENSMUSG00000000416	2846	3203	2364	5345	5451	4311
ENSMUSG00000000420	2083	2653	2928	1912	2325	2322
ENSMUSG00000000435	0	0	0	0	0	0
ENSMUSG00000000439	890	744	1216	1253	1350	1595
ENSMUSG00000000440	363	415	492	162	316	179
ENSMUSG00000000441	2904	3926	4191	4782	5183	4522
ENSMUSG00000000486	507	602	793	378	478	343
ENSMUSG00000000489	910	1828	2519	171	251	570
ENSMUSG00000000530	2634	4024	3463	680	1278	1172
ENSMUSG00000000531	2567	2796	2845	1573	2290	2409
ENSMUSG00000000532	1641	2394	2374	2178	2165	2464
ENSMUSG00000000538	3547	4766	3883	4932	5339	4500
ENSMUSG00000000544	0	58	0	0	0	2
ENSMUSG00000000552	995	1111	1432	1061	1431	1250
ENSMUSG00000000555	5056	5011	4174	1937	2263	2274
ENSMUSG00000000560	0	0	0	0	0	0
ENSMUSG00000000561	165	562	353	887	839	1010
ENSMUSG00000000562	0	0	0	0	0	0
ENSMUSG00000000563	976	1305	1086	1528	1558	1402
ENSMUSG00000000567	4339	4948	4422	1197	1493	1816
ENSMUSG00000000568	3901	6214	6265	8619	8403	9309
ENSMUSG00000000579	0	94	67	91	105	37
ENSMUSG00000000581	224	740	890	409	642	430
ENSMUSG00000000594	1117	1999	2192	1739	2215	1935
ENSMUSG00000000600	1357	1656	1156	2196	2041	2072
ENSMUSG00000000605	2393	3133	3237	1946	1939	2715
ENSMUSG00000000606	0	0	0	0	0	0
ENSMUSG00000000617	0	0	0	0	0	0
ENSMUSG00000000627	67	321	134	60	88	80
ENSMUSG00000000628	4151	2915	2979	949	1008	1325
ENSMUSG00000000631	3123	4052	4418	2341	2825	2963
ENSMUSG00000000632	0	0	0	0	0	0
ENSMUSG00000000673	0	27	0	0	0	0
ENSMUSG00000000682	1	27	235	1	42	35
ENSMUSG00000000686	2	39	0	54	46	41
ENSMUSG00000000690	754	1399	1210	98	123	393
ENSMUSG00000000693	568	992	634	681	880	830
ENSMUSG00000000701	0	0	0	0	0	0
ENSMUSG00000000706	0	0	0	0	0	0
ENSMUSG00000000708	1979	2787	1946	2469	2395	2356
ENSMUSG00000000711	2829	3267	3672	5223	6483	5393
ENSMUSG00000000724	0	0	0	0	0	0
ENSMUSG00000000730	0	18	1	0	0	0
ENSMUSG00000000731	0	0	0	0	0	0
ENSMUSG00000000732	1300	1318	1043	225	460	48
ENSMUSG00000000738	1797	1604	1818	2346	2329	2155
ENSMUSG00000000739	1256	1421	1208	721	939	1380
ENSMUSG00000000740	960	1312	1539	1309	1334	1508
ENSMUSG00000000743	1451	1913	1895	2742	2582	2346
ENSMUSG00000000751	1107	1696	2207	2289	2841	2597
ENSMUSG00000000753	6395	9498	6966	144	396	177
ENSMUSG00000000759	1422	1713	1667	3479	3406	3189
ENSMUSG00000000766	0	0	0	0	0	0
ENSMUSG00000000776	800	1090	701	859	1215	1128
ENSMUSG00000000782	522	388	611	1278	1167	1394
ENSMUSG00000000787	35164	49989	45159	36151	40040	45316
ENSMUSG00000000791	26	0	0	29	24	0
ENSMUSG00000000792	142	31	28	13	31	42
ENSMUSG00000000794	174	325	606	149	94	76
ENSMUSG00000000804	1643	1610	1983	4397	4167	4403
ENSMUSG00000000805	74	61	84	22	49	0
ENSMUSG00000000811	580	906	870	702	697	696
ENSMUSG00000000817	0	0	0	0	0	0
ENSMUSG00000000823	1757	2600	2837	2253	2649	2423
ENSMUSG00000000826	3629	3946	3898	5265	5800	5879
ENSMUSG00000000827	2131	3016	2499	2027	2225	2457
ENSMUSG00000000838	2277	2431	2264	3558	3111	2980
ENSMUSG00000000861	265	341	653	1373	1750	1707
ENSMUSG00000000869	0	0	0	19	0	0
ENSMUSG00000000876	375	949	693	380	587	489
ENSMUSG00000000881	776	1120	369	241	539	395
ENSMUSG00000000884	98	359	568	358	280	298
ENSMUSG00000000889	1	0	0	2	37	0
ENSMUSG00000000901	556	907	251	411	269	284
ENSMUSG00000000902	897	1271	1459	2190	2187	2084
ENSMUSG00000000903	0	0	0	0	0	0
ENSMUSG00000000915	1726	1578	2271	597	1314	1055
ENSMUSG00000000916	487	766	644	1305	1369	1009
ENSMUSG00000000934	247	402	344	661	608	525
ENSMUSG00000000938	75	89	1	1	38	42
ENSMUSG00000000942	1	17	0	1	15	12
ENSMUSG00000000948	34	66	36	0	27	63
ENSMUSG00000000957	11848	15656	11557	9224	11935	10502
ENSMUSG00000000958	229	785	946	244	360	232
ENSMUSG00000000959	697	1163	1216	1187	1393	1318
ENSMUSG00000000976	732	893	552	1092	1178	1110
ENSMUSG00000000982	0	19	7	0	0	0
ENSMUSG00000000983	0	0	0	0	0	0
ENSMUSG00000001014	1	76	121	0	0	21
ENSMUSG00000001016	1668	2151	2354	3723	3474	4572
ENSMUSG00000001017	5491	5535	6044	8499	10827	10005
ENSMUSG00000001018	1414	1443	1676	1865	2044	1653
ENSMUSG00000001020	70	35	59	15	2	11
ENSMUSG00000001021	0	26	1	56	0	17
ENSMUSG00000001023	0	0	0	0	0	0
ENSMUSG00000001025	8234	7377	9538	1360	2221	2234
ENSMUSG00000001027	0	29	0	0	2	0
ENSMUSG00000001029	589	964	873	140	111	121
ENSMUSG00000001034	1193	1388	1385	1525	1404	1810
ENSMUSG00000001036	2394	3632	3373	3400	4143	4369
ENSMUSG00000001039	125	111	149	52	232	168
ENSMUSG00000001052	2357	3212	2556	2977	3602	3408
ENSMUSG00000001053	825	1433	2092	605	638	734
ENSMUSG00000001054	1131	1093	1249	975	1118	1094
ENSMUSG00000001056	529	761	1509	781	1048	1028
ENSMUSG00000001062	1346	1057	1653	1559	1151	1732
ENSMUSG00000001065	1733	1413	1370	3045	2647	2914
ENSMUSG00000001076	0	0	0	0	0	0
ENSMUSG00000001082	1910	1452	1486	1336	1856	1779
ENSMUSG00000001089	3399	3741	3990	3179	3186	3271
ENSMUSG00000001095	0	0	0	0	0	0
ENSMUSG00000001098	5448	8335	7228	4495	5144	5443
ENSMUSG00000001100	1158	1060	1106	1411	1800	1905
ENSMUSG00000001103	27	152	1	0	1	1
ENSMUSG00000001105	1203	1400	1907	1584	1577	1795
ENSMUSG00000001119	37161	44555	31952	1101	3363	3238
ENSMUSG00000001120	453	430	435	457	603	585
ENSMUSG00000001123	1682	2045	2533	377	507	387
ENSMUSG00000001127	3080	4706	3800	5021	5365	6135
ENSMUSG00000001128	453	471	915	456	445	686
ENSMUSG00000001131	320	454	259	61	118	136
ENSMUSG00000001134	1	33	4	66	92	128
ENSMUSG00000001138	1106	1264	1467	2445	2288	2225
ENSMUSG00000001143	717	594	765	1546	1788	1466
ENSMUSG00000001150	1586	1874	1324	2792	2743	2413
ENSMUSG00000001151	2022	2582	2881	3085	3401	3073
ENSMUSG00000001155	0	0	1	25	0	0
ENSMUSG00000001156	1466	1764	1524	2453	2293	2855
ENSMUSG00000001157	477	826	949	610	902	580
ENSMUSG00000001158	454	871	647	761	1035	840
ENSMUSG00000001166	75	176	126	101	153	35
ENSMUSG00000001168	0	0	0	0	0	0
ENSMUSG00000001173	868	1485	1737	1687	1842	1721
ENSMUSG00000001175	11194	14301	19525	8631	10164	12292
ENSMUSG00000001211	2366	3350	3065	3863	4435	4830
ENSMUSG00000001225	0	0	0	0	0	0
ENSMUSG00000001227	3225	3496	3592	142	386	320
ENSMUSG00000001228	270	245	275	376	335	534
ENSMUSG00000001229	1685	1693	1825	1987	1756	1718
ENSMUSG00000001240	2698	4420	4859	242	740	527
ENSMUSG00000001247	316	372	532	147	272	306
ENSMUSG00000001248	6550	6673	6621	6599	6459	7771
ENSMUSG00000001249	208	141	188	29	1	26
ENSMUSG00000001260	0	0	0	0	0	0
ENSMUSG00000001270	1377	981	1133	1205	1291	1124
ENSMUSG00000001280	3230	4610	5721	6363	6619	7364
ENSMUSG00000001281	94	111	130	60	34	4
ENSMUSG00000001285	328	437	460	736	694	1084
ENSMUSG00000001288	3204	4571	5383	4248	5539	5487
ENSMUSG00000001289	737	668	1327	914	1128	1225
ENSMUSG00000001300	5506	6722	7510	1666	2610	2960
ENSMUSG00000001305	499	397	480	358	605	633
ENSMUSG00000001313	524	487	579	1351	884	1295
ENSMUSG00000001323	541	735	771	523	628	731
ENSMUSG00000001333	44	13	53	15	161	48
ENSMUSG00000001334	1	18	58	0	0	0
ENSMUSG00000001348	147	221	209	146	338	147
ENSMUSG00000001349	96	36	190	13	120	83
ENSMUSG00000001366	564	1173	1201	1486	1461	1549
ENSMUSG00000001376	683	979	692	652	696	1062
ENSMUSG00000001380	925	1731	1718	2390	2098	1852
ENSMUSG00000001383	1969	2238	2420	3175	3240	2928
ENSMUSG00000001403	62	79	3	37	127	111
ENSMUSG00000001415	2854	3027	3031	6698	6504	6206
ENSMUSG00000001416	2633	2326	3518	3985	3879	4397
ENSMUSG00000001418	1639	2688	2486	4129	3814	3746
ENSMUSG00000001419	3328	4610	4536	8824	8508	9428
ENSMUSG00000001420	27	181	128	193	257	294
ENSMUSG00000001424	2932	3103	3606	3524	4206	3860
ENSMUSG00000001435	17523	22466	19381	1578	2797	3483
ENSMUSG00000001436	305	361	458	283	375	258
ENSMUSG00000001440	6957	8322	8867	9737	9161	10169
ENSMUSG00000001441	1883	2903	4210	4276	4195	4895
ENSMUSG00000001444	0	12	0	0	0	0
ENSMUSG00000001445	771	1071	951	891	1054	817
ENSMUSG00000001467	1120	1170	1460	2541	2242	2826
ENSMUSG00000001472	6842	9665	8770	22076	22196	23419
ENSMUSG00000001473	2242	2201	1846	833	971	1092
ENSMUSG00000001482	1127	1321	1082	1568	1675	1724
ENSMUSG00000001493	3273	4540	4364	46	189	76
ENSMUSG00000001494	0	0	0	0	0	0
ENSMUSG00000001496	0	0	0	0	0	0
ENSMUSG00000001497	0	0	0	0	0	0
ENSMUSG00000001504	1767	1801	2916	722	1250	2307
ENSMUSG00000001506	191635	232849	165966	3657	26055	17163
ENSMUSG00000001507	1928	3304	4045	941	1658	1759
ENSMUSG00000001508	0	0	13	0	0	0
ENSMUSG00000001510	21	91	88	70	67	84
ENSMUSG00000001517	456	290	184	422	301	460
ENSMUSG00000001518	690	956	1210	1039	1037	929
ENSMUSG00000001520	2	76	35	0	35	37
ENSMUSG00000001521	1503	1709	1639	3396	3173	3262
ENSMUSG00000001524	120	347	287	444	423	516
ENSMUSG00000001525	7969	8874	9564	6599	7747	8059
ENSMUSG00000001542	248	481	584	144	404	288
ENSMUSG00000001552	4046	4370	7102	2515	4376	4551
ENSMUSG00000001555	3032	3536	3505	267	354	485
ENSMUSG00000001558	27	12	0	2	11	19
ENSMUSG00000001566	0	0	0	0	24	0
ENSMUSG00000001569	833	1300	916	1720	1653	1869
ENSMUSG00000001576	1839	2829	1928	1552	1507	1650
ENSMUSG00000001583	415	237	713	457	327	494
ENSMUSG00000001588	4	87	140	689	689	828
ENSMUSG00000001604	225	155	214	38	1	56
ENSMUSG00000001622	0	0	0	0	0	0
ENSMUSG00000001627	9949	8452	10978	6671	6198	9345
ENSMUSG00000001630	293	534	269	1219	750	628
ENSMUSG00000001632	2237	2324	3036	3842	4026	4076
ENSMUSG00000001642	230	225	371	313	438	519
ENSMUSG00000001655	7	47	231	105	73	286
ENSMUSG00000001656	35	13	21	0	1	0
ENSMUSG00000001657	428	524	653	125	236	242
ENSMUSG00000001661	546	427	489	57	170	147
ENSMUSG00000001663	490	1071	570	269	212	183
ENSMUSG00000001665	231	265	414	63	131	94
ENSMUSG00000001666	61	79	221	93	94	99
ENSMUSG00000001670	0	0	0	0	0	0
ENSMUSG00000001672	22	86	89	37	74	93
ENSMUSG00000001674	190	379	211	185	195	429
ENSMUSG00000001687	2226	1990	3591	10372	9624	10311
ENSMUSG00000001700	441	467	606	328	337	265
ENSMUSG00000001707	291	235	472	319	378	485
ENSMUSG00000001729	7059	7354	8068	10753	11895	11211
ENSMUSG00000001739	147	141	96	0	134	29
ENSMUSG00000001741	1195	2229	1137	1287	1346	877
ENSMUSG00000001750	2773	4488	4230	3957	3265	3790
ENSMUSG00000001751	648	1205	761	956	1273	1068
ENSMUSG00000001755	991	795	759	796	1056	1015
ENSMUSG00000001761	3087	3635	4091	2192	2782	2110
ENSMUSG00000001763	0	0	0	1	54	8
ENSMUSG00000001767	554	943	843	1091	877	864
ENSMUSG00000001768	2541	3228	3290	2466	2542	2778
ENSMUSG00000001773	0	0	0	0	0	0
ENSMUSG00000001774	722	879	1142	1346	899	1076
ENSMUSG00000001783	3114	4287	4389	3726	4216	3896
ENSMUSG00000001785	432	561	302	525	669	719
ENSMUSG00000001786	660	1365	1046	2340	2482	2039
ENSMUSG00000001794	6032	7204	8289	5546	6433	7212
ENSMUSG00000001802	1042	813	310	156	284	182
ENSMUSG00000001804	0	0	0	0	0	0
ENSMUSG00000001815	0	0	0	0	0	0
ENSMUSG00000001819	0	23	0	0	0	0
ENSMUSG00000001823	0	0	0	0	0	0
ENSMUSG00000001827	0	0	0	0	0	0
ENSMUSG00000001829	558	791	591	877	1002	877
ENSMUSG00000001833	3477	6375	5208	4468	3906	5253
ENSMUSG00000001844	813	1216	983	1338	1345	1242
ENSMUSG00000001847	4910	7297	7135	6671	7227	6621
ENSMUSG00000001855	1337	1742	1241	3561	3075	2838
ENSMUSG00000001864	50	34	212	170	274	183
ENSMUSG00000001865	1	36	1	0	7	0
ENSMUSG00000001870	6666	8776	6142	400	881	706
ENSMUSG00000001891	1279	1803	1713	2344	2457	2708
ENSMUSG00000001901	0	0	68	1	0	17
ENSMUSG00000001909	1506	1982	1944	2879	3021	3300
ENSMUSG00000001910	1213	2084	1714	2337	2352	2300
ENSMUSG00000001911	11315	15515	14142	4303	7949	7746
ENSMUSG00000001918	4499	6203	4558	2456	2021	2846
ENSMUSG00000001924	6710	8000	7156	7411	8919	8155
ENSMUSG00000001930	26374	35771	35792	573	2818	2323
ENSMUSG00000001942	546	875	878	438	457	600
ENSMUSG00000001943	243	546	237	25	30	72
ENSMUSG00000001946	5052	8037	6821	288	953	938
ENSMUSG00000001948	61	90	135	48	105	117
ENSMUSG00000001962	1131	1408	1239	2329	2100	2768
ENSMUSG00000001964	1380	1532	1950	1774	2233	2341
ENSMUSG00000001983	137	69	68	209	251	160
ENSMUSG00000001985	155	322	149	225	276	247
ENSMUSG00000001986	868	1165	861	49	37	22
ENSMUSG00000001988	0	16	0	0	1	0
ENSMUSG00000001995	1581	1715	2065	4365	5793	4589
ENSMUSG00000001998	385	1133	970	1613	1560	1409
ENSMUSG00000001999	471	357	392	394	340	528
ENSMUSG00000002006	556	501	578	136	338	216
ENSMUSG00000002007	112	117	1	3	58	34
ENSMUSG00000002010	1597	2134	2150	1976	2370	2734
ENSMUSG00000002012	212	103	56	174	113	79
ENSMUSG00000002014	1156	1386	1571	1409	1490	1566
ENSMUSG00000002015	2918	3291	4276	3512	3802	4366
ENSMUSG00000002017	593	1125	905	1022	1090	1152
ENSMUSG00000002020	5252	4532	4689	576	889	1190
ENSMUSG00000002028	4351	6378	5132	11448	9000	10014
ENSMUSG00000002031	974	969	823	1551	1447	1585
ENSMUSG00000002032	0	55	36	63	64	93
ENSMUSG00000002033	0	0	0	22	0	0
ENSMUSG00000002043	270	399	372	507	616	543
ENSMUSG00000002052	4263	5662	5540	8146	8857	9495
ENSMUSG00000002055	118	68	3	11	115	81
ENSMUSG00000002057	0	0	0	0	0	42
ENSMUSG00000002058	252	135	254	105	98	152
ENSMUSG00000002059	2456	2826	2195	2811	2316	2465
ENSMUSG00000002064	766	1197	1131	1363	1682	2042
ENSMUSG00000002068	330	398	166	226	223	310
ENSMUSG00000002076	0	2	0	0	0	0
ENSMUSG00000002083	1097	788	1468	1759	1450	1916
ENSMUSG00000002100	0	28	0	8	0	0
ENSMUSG00000002102	3254	3300	4550	4593	5273	5783
ENSMUSG00000002103	1170	1857	1346	960	1414	1009
ENSMUSG00000002104	2	1	2	42	174	183
ENSMUSG00000002105	1531	1742	2212	1052	1482	1601
ENSMUSG00000002107	1200	2275	2129	5364	5314	4687
ENSMUSG00000002108	1437	1858	1455	72	193	141
ENSMUSG00000002109	666	678	541	1183	1485	1421
ENSMUSG00000002111	51	87	277	1	28	0
ENSMUSG00000002129	2141	2708	2735	3300	3694	4123
ENSMUSG00000002147	4663	6103	5497	6283	6852	6211
ENSMUSG00000002190	0	0	0	0	0	0
ENSMUSG00000002204	0	129	73	27	43	0
ENSMUSG00000002205	496	664	736	727	554	1045
ENSMUSG00000002210	480	692	735	919	900	864
ENSMUSG00000002221	1174	1387	1846	2510	2589	2478
ENSMUSG00000002222	3610	4011	3393	5823	5465	6814
ENSMUSG00000002227	520	465	525	1018	1181	1026
ENSMUSG00000002228	84	95	85	86	67	164
ENSMUSG00000002233	3369	3569	3477	4092	3482	4360
ENSMUSG00000002240	0	0	0	0	0	0
ENSMUSG00000002249	1111	1099	998	1947	1910	2006
ENSMUSG00000002250	1311	1738	2120	1931	2118	2093
ENSMUSG00000002257	855	902	1048	203	272	390
ENSMUSG00000002265	3489	3843	2857	4270	3008	3080
ENSMUSG00000002266	0	35	61	26	27	34
ENSMUSG00000002274	155	179	109	429	387	443
ENSMUSG00000002279	439	677	668	595	661	570
ENSMUSG00000002280	385	472	370	723	784	619
ENSMUSG00000002289	2922	3704	2499	3148	3507	3346
ENSMUSG00000002297	70	128	96	273	212	179
ENSMUSG00000002307	1428	1327	1954	1904	1935	2319
ENSMUSG00000002308	126	184	159	248	192	291
ENSMUSG00000002319	1422	2412	2167	2869	2299	2683
ENSMUSG00000002320	1701	2086	2272	1954	2979	2318
ENSMUSG00000002324	13	60	29	31	3	98
ENSMUSG00000002325	1969	2591	2065	3389	3723	3178
ENSMUSG00000002326	415	789	536	418	692	603
ENSMUSG00000002329	590	832	1017	1063	1143	793
ENSMUSG00000002332	673	1069	915	692	1222	764
ENSMUSG00000002341	1	2	0	67	85	0
ENSMUSG00000002342	863	1332	1176	1405	2142	1424
ENSMUSG00000002343	99	275	133	543	403	325
ENSMUSG00000002345	317	616	695	649	724	842
ENSMUSG00000002346	330	542	225	1055	860	753
ENSMUSG00000002365	1607	2543	2754	5480	5100	6012
ENSMUSG00000002372	1515	1926	1642	2736	2949	2516
ENSMUSG00000002379	553	300	745	509	998	593
ENSMUSG00000002384	0	9	36	19	0	0
ENSMUSG00000002393	1144	1098	1678	1593	2062	1708
ENSMUSG00000002395	3254	2610	4033	3053	4134	3689
ENSMUSG00000002396	408	413	411	532	757	497
ENSMUSG00000002409	537	513	505	768	976	1066
ENSMUSG00000002413	1437	2257	1961	2209	1594	2345
ENSMUSG00000002416	164	332	171	369	304	344
ENSMUSG00000002428	591	979	1039	963	790	936
ENSMUSG00000002455	2066	2569	2687	3369	3161	3741
ENSMUSG00000002458	387	209	185	53	265	200
ENSMUSG00000002459	0	19	51	0	0	0
ENSMUSG00000002475	77	100	64	51	116	41
ENSMUSG00000002477	220	93	254	262	175	152
ENSMUSG00000002486	789	593	708	1404	1439	1340
ENSMUSG00000002489	1536	1931	1994	607	1527	1503
ENSMUSG00000002496	3440	4069	3731	4907	5354	4706
ENSMUSG00000002500	0	1	1	6	30	9
ENSMUSG00000002504	2573	4100	3608	203	848	828
ENSMUSG00000002524	3044	3678	4589	6177	7070	6255
ENSMUSG00000002546	4055	5379	3856	4438	4819	4762
ENSMUSG00000002550	536	661	591	1243	1589	1200
ENSMUSG00000002565	215	431	400	172	341	505
ENSMUSG00000002578	226	286	199	2318	1744	1851
ENSMUSG00000002580	614	612	802	850	874	700
ENSMUSG00000002588	0	0	0	0	0	0
ENSMUSG00000002602	9297	13541	9480	681	1636	1983
ENSMUSG00000002603	1846	2015	2985	1044	1284	1397
ENSMUSG00000002608	1725	1691	1737	2081	1889	1984
ENSMUSG00000002617	252	124	327	420	332	339
ENSMUSG00000002625	2440	3412	2758	5789	6092	4808
ENSMUSG00000002633	0	32	53	13	0	0
ENSMUSG00000002635	540	265	258	622	488	552
ENSMUSG00000002658	2527	2386	2522	3076	3849	3896
ENSMUSG00000002660	212	533	726	432	788	669
ENSMUSG00000002661	122	165	174	126	253	227
ENSMUSG00000002664	0	0	0	44	12	1
ENSMUSG00000002668	56	97	70	2	49	6
ENSMUSG00000002679	440	723	879	1121	832	1029
ENSMUSG00000002688	329	533	562	128	211	146
ENSMUSG00000002699	0	28	85	1	0	0
ENSMUSG00000002718	1200	1316	975	1738	1812	1747
ENSMUSG00000002728	359	368	271	594	422	450
ENSMUSG00000002731	235	519	551	455	493	553
ENSMUSG00000002732	1230	1309	1596	137	487	271
ENSMUSG00000002733	1232	1631	1296	1239	1265	1378
ENSMUSG00000002741	2660	3381	4642	3911	3815	3602
ENSMUSG00000002748	5545	7196	5675	9204	8693	10131
ENSMUSG00000002763	2639	2175	2236	3375	3370	2931
ENSMUSG00000002767	569	744	1267	975	1223	1087
ENSMUSG00000002768	549	1088	1127	1269	1520	1245
ENSMUSG00000002769	1	23	39	53	70	93
ENSMUSG00000002771	339	269	58	51	95	194
ENSMUSG00000002778	2123	2660	2563	1836	1779	1938
ENSMUSG00000002781	202	318	305	639	829	722
ENSMUSG00000002791	0	0	0	0	0	0
ENSMUSG00000002797	346	458	334	286	419	419
ENSMUSG00000002799	3326	4324	5990	1371	3655	3691
ENSMUSG00000002803	342	535	306	177	313	265
ENSMUSG00000002804	72	126	416	96	288	85
ENSMUSG00000002808	490	472	598	865	843	1184
ENSMUSG00000002812	5382	5908	4907	6344	6769	6634
ENSMUSG00000002814	495	415	411	663	663	943
ENSMUSG00000002820	376	657	834	1278	1633	1237
ENSMUSG00000002825	665	480	531	1157	980	1220
ENSMUSG00000002831	179	268	622	14	135	143
ENSMUSG00000002833	2875	2367	2407	3815	4578	3509
ENSMUSG00000002835	211	296	467	474	597	751
ENSMUSG00000002844	1550	2108	2478	2755	3127	2647
ENSMUSG00000002845	1930	1927	1292	864	1214	986
ENSMUSG00000002846	153	385	334	600	738	831
ENSMUSG00000002847	35	133	77	22	35	0
ENSMUSG00000002870	362	452	697	1004	1011	1227
ENSMUSG00000002871	1366	1402	1829	1510	1613	1705
ENSMUSG00000002881	2054	2856	2561	2179	1907	2222
ENSMUSG00000002885	1709	2092	2574	5802	6666	6190
ENSMUSG00000002897	1368	1101	1638	1917	1945	2270
ENSMUSG00000002900	19178	23299	20210	655	2156	2033
ENSMUSG00000002908	66	65	160	48	46	36
ENSMUSG00000002910	759	1206	1287	1448	1768	2640
ENSMUSG00000002930	0	0	0	0	0	0
ENSMUSG00000002944	3632	8365	6931	140	625	386
ENSMUSG00000002948	1956	3026	2562	3389	4217	4069
ENSMUSG00000002949	1095	1842	1482	2994	3397	3019
ENSMUSG00000002957	2962	4157	3575	3207	4094	3683
ENSMUSG00000002963	513	658	1224	1053	1313	1189
ENSMUSG00000002968	1032	1602	1916	3743	3361	3633
ENSMUSG00000002980	9201	11874	16053	1396	3280	3196
ENSMUSG00000002981	2736	2662	3092	3812	4205	4099
ENSMUSG00000002983	1642	1509	1788	1327	1362	1619
ENSMUSG00000002984	601	846	942	1287	1709	1424
ENSMUSG00000002985	79842	90868	96499	38009	67074	60821
ENSMUSG00000002992	0	0	0	0	0	0
ENSMUSG00000002996	1703	2710	3476	6126	5709	6878
ENSMUSG00000002997	38	233	157	158	174	360
ENSMUSG00000003031	3877	5995	5971	7907	7686	9515
ENSMUSG00000003032	31776	33657	42933	17909	21088	26990
ENSMUSG00000003033	1889	2013	1216	3453	3765	3506
ENSMUSG00000003037	1202	1319	1217	1353	1441	1234
ENSMUSG00000003038	373	711	575	559	747	797
ENSMUSG00000003039	1414	2257	2250	2180	2146	2174
ENSMUSG00000003051	2	71	173	46	66	84
ENSMUSG00000003053	0	0	0	0	0	0
ENSMUSG00000003062	311	560	508	426	622	405
ENSMUSG00000003068	5630	5788	6724	12602	13954	13167
ENSMUSG00000003070	267	547	410	112	117	130
ENSMUSG00000003072	2248	1505	2496	2800	2646	2975
ENSMUSG00000003099	1395	1630	2224	2103	2563	2672
ENSMUSG00000003119	1906	2806	2545	4003	3637	3895
ENSMUSG00000003123	2237	2026	1718	883	917	796
ENSMUSG00000003131	2294	2722	2408	3649	3469	3536
ENSMUSG00000003134	1602	2698	2836	605	1052	1104
ENSMUSG00000003135	457	634	566	1145	1160	1015
ENSMUSG00000003153	253	465	241	136	117	201
ENSMUSG00000003154	2226	3372	2862	2826	2603	3227
ENSMUSG00000003161	2038	3136	3780	1357	1543	1740
ENSMUSG00000003166	1800	2622	2027	2311	2360	2508
ENSMUSG00000003184	1998	1640	1937	2235	3036	2464
ENSMUSG00000003190	358	411	461	591	555	858
ENSMUSG00000003198	97	202	365	364	265	266
ENSMUSG00000003199	1285	1265	1450	1670	1624	1969
ENSMUSG00000003200	3226	2868	3338	2665	3616	3598
ENSMUSG00000003206	0	10	0	0	1	0
ENSMUSG00000003208	544	260	441	274	287	329
ENSMUSG00000003226	4413	5822	4917	7937	6939	8458
ENSMUSG00000003227	0	21	118	58	89	79
ENSMUSG00000003228	1384	2166	2189	428	428	488
ENSMUSG00000003233	1655	1523	1248	2148	2182	1920
ENSMUSG00000003234	1655	1832	1984	2096	2136	2244
ENSMUSG00000003235	498	869	754	1089	1145	1002
ENSMUSG00000003269	2382	2626	3021	3919	4193	4178
ENSMUSG00000003271	1	15	1	0	2	95
ENSMUSG00000003273	663	531	829	5073	5750	4534
ENSMUSG00000003279	142	57	248	3	48	118
ENSMUSG00000003282	87	159	145	420	337	589
ENSMUSG00000003283	312	81	107	0	5	1
ENSMUSG00000003299	703	1034	1268	1092	922	827
ENSMUSG00000003308	1928	2233	1948	1263	1938	1805
ENSMUSG00000003309	45	150	155	98	49	140
ENSMUSG00000003316	8956	11203	11645	8750	10152	8950
ENSMUSG00000003341	4	1	8	287	398	314
ENSMUSG00000003344	1496	2307	1846	2297	1944	2451
ENSMUSG00000003345	3954	4462	4367	4045	5112	4983
ENSMUSG00000003346	873	779	1142	999	1153	907
ENSMUSG00000003348	459	938	1175	793	1200	1105
ENSMUSG00000003352	151	687	607	457	535	631
ENSMUSG00000003354	0	0	21	0	0	0
ENSMUSG00000003355	95	100	140	21	32	2
ENSMUSG00000003360	4403	5348	5228	6663	6280	6887
ENSMUSG00000003363	1646	1889	2276	1553	1914	1333
ENSMUSG00000003378	1040	1322	1345	1002	1656	1213
ENSMUSG00000003379	0	63	3	61	27	43
ENSMUSG00000003380	4877	4853	5354	5394	6606	6651
ENSMUSG00000003382	2212	2376	2342	2871	3027	3509
ENSMUSG00000003402	2012	2268	1796	2493	2788	2710
ENSMUSG00000003410	0	0	0	0	0	0
ENSMUSG00000003411	0	1	1	60	67	104
ENSMUSG00000003418	134	99	23	0	30	38
ENSMUSG00000003420	7023	9280	9379	1611	2365	2448
ENSMUSG00000003421	573	1399	1355	1290	1304	1205
ENSMUSG00000003423	570	904	661	841	846	994
ENSMUSG00000003429	9741	11076	15807	8111	12618	11473
ENSMUSG00000003435	5838	9175	6046	9243	10963	10119
ENSMUSG00000003436	0	0	21	0	0	0
ENSMUSG00000003437	3583	3853	3887	5283	5192	6022
ENSMUSG00000003438	366	555	840	1281	1252	1011
ENSMUSG00000003444	105	147	102	181	137	266
ENSMUSG00000003452	50	109	77	344	310	390
ENSMUSG00000003458	3213	3650	3695	3466	3806	4315
ENSMUSG00000003464	1586	2202	2006	2056	2782	2415
ENSMUSG00000003469	645	566	896	183	286	428
ENSMUSG00000003476	0	0	0	0	0	0
ENSMUSG00000003477	2	19	50	0	0	1
ENSMUSG00000003484	35	34	22	0	2	1
ENSMUSG00000003500	1465	1945	1801	1658	1830	1680
ENSMUSG00000003505	0	0	0	0	0	0
ENSMUSG00000003518	2258	3125	3407	1354	1408	1294
ENSMUSG00000003526	646	517	519	1869	1871	1668
ENSMUSG00000003527	708	930	566	829	1093	1173
ENSMUSG00000003528	556	1046	1273	1644	1943	2015
ENSMUSG00000003531	642	519	661	626	881	470
ENSMUSG00000003534	3124	3630	5763	7479	9087	8853
ENSMUSG00000003541	12888	11680	17628	6895	7387	9969
ENSMUSG00000003545	150456	119703	138139	184135	167753	184107
ENSMUSG00000003546	985	1198	1006	2443	2687	3059
ENSMUSG00000003549	604	579	441	798	870	1240
ENSMUSG00000003555	2	71	116	2	124	17
ENSMUSG00000003559	917	1006	1064	202	214	227
ENSMUSG00000003573	1223	1525	1747	1169	1332	1306
ENSMUSG00000003575	964	1509	1323	1795	1752	1549
ENSMUSG00000003581	1708	1967	1695	1697	1200	1732
ENSMUSG00000003585	106	246	530	983	1079	1148
ENSMUSG00000003604	206	190	568	222	408	343
ENSMUSG00000003617	21670	28842	23071	562	1264	1050
ENSMUSG00000003623	516	1456	541	650	877	609
ENSMUSG00000003644	284	488	486	145	371	448
ENSMUSG00000003657	0	0	0	0	0	0
ENSMUSG00000003660	4415	4565	5591	7768	8303	8219
ENSMUSG00000003662	579	1003	812	882	809	702
ENSMUSG00000003665	724	299	588	5	35	51
ENSMUSG00000003680	559	619	892	732	750	1076
ENSMUSG00000003721	1268	920	1596	1852	2025	2312
ENSMUSG00000003731	1409	2251	1595	2610	2554	2952
ENSMUSG00000003746	5433	9391	7809	278	571	744
ENSMUSG00000003752	1953	1140	2729	1840	1608	2174
ENSMUSG00000003762	438	469	481	842	1031	995
ENSMUSG00000003778	2174	2762	2455	4347	3855	4795
ENSMUSG00000003779	2	65	287	132	148	98
ENSMUSG00000003808	1178	980	1723	2525	2016	2732
ENSMUSG00000003809	970	653	964	1587	1601	1024
ENSMUSG00000003810	4040	4952	3927	4876	5165	4964
ENSMUSG00000003812	444	389	740	666	1209	1125
ENSMUSG00000003813	1473	1964	1948	1773	2508	2260
ENSMUSG00000003814	22631	23091	23381	19071	20692	23806
ENSMUSG00000003824	86	138	122	13	69	125
ENSMUSG00000003847	10349	13880	10335	11839	9687	13073
ENSMUSG00000003848	1050	1081	658	1706	1334	1799
ENSMUSG00000003849	347	441	494	99	80	81
ENSMUSG00000003863	26	218	220	171	242	271
ENSMUSG00000003865	330	651	594	381	416	591
ENSMUSG00000003868	851	1018	1140	1331	1621	1657
ENSMUSG00000003872	121	2	51	75	71	274
ENSMUSG00000003873	1164	1204	1767	2073	2169	2247
ENSMUSG00000003882	0	4	70	0	16	0
ENSMUSG00000003923	420	795	631	898	784	1013
ENSMUSG00000003929	224	619	133	571	466	490
ENSMUSG00000003934	95	121	228	104	163	197
ENSMUSG00000003948	277	601	629	1042	1098	921
ENSMUSG00000003949	2004	2875	1456	661	794	961
ENSMUSG00000003955	476	558	659	397	507	355
ENSMUSG00000003970	12062	12837	16678	17862	21377	21623
ENSMUSG00000003974	0	0	0	0	0	0
ENSMUSG00000003992	986	1213	986	1191	1373	1219
ENSMUSG00000004018	93	133	160	85	102	92
ENSMUSG00000004031	0	12	1	0	24	0
ENSMUSG00000004032	1065	1415	1228	629	574	740
ENSMUSG00000004035	516	406	271	111	47	29
ENSMUSG00000004038	0	0	0	0	0	0
ENSMUSG00000004040	11123	11534	11337	21032	16529	20860
ENSMUSG00000004043	1658	2060	1910	4924	4811	5189
ENSMUSG00000004044	25725	34344	33665	11349	15249	14360
ENSMUSG00000004054	3769	3898	5010	4736	6150	5180
ENSMUSG00000004056	2217	2806	2377	3155	3269	3061
ENSMUSG00000004069	708	1466	1209	1162	1763	1312
ENSMUSG00000004070	807	1105	1034	682	886	625
ENSMUSG00000004071	1677	1831	1532	2471	2661	2983
ENSMUSG00000004085	1685	2535	2724	1586	1446	1888
ENSMUSG00000004096	1035	1438	1708	1643	2173	1848
ENSMUSG00000004098	17231	19448	14571	6882	7759	6830
ENSMUSG00000004099	1400	2116	1848	5185	4893	4941
ENSMUSG00000004100	983	833	984	1627	1911	1894
ENSMUSG00000004105	2205	3858	4133	6046	6614	6667
ENSMUSG00000004110	402	820	1106	98	128	244
ENSMUSG00000004113	83	13	0	20	25	1
ENSMUSG00000004127	177	118	277	116	311	144
ENSMUSG00000004151	1031	1368	1056	143	236	348
ENSMUSG00000004187	711	738	795	1592	1289	1520
ENSMUSG00000004207	32840	47519	48900	31096	39914	36989
ENSMUSG00000004221	794	1109	1549	1690	1825	1703
ENSMUSG00000004231	0	0	0	0	0	0
ENSMUSG00000004233	203	311	283	365	379	373
ENSMUSG00000004263	1425	1748	958	1270	1409	1609
ENSMUSG00000004264	2598	2578	3153	3374	3795	3589
ENSMUSG00000004266	283	740	328	48	267	79
ENSMUSG00000004267	651	842	684	824	840	740
ENSMUSG00000004268	1126	1284	1963	1763	1674	2197
ENSMUSG00000004270	858	1188	1388	947	1173	919
ENSMUSG00000004285	791	1095	1047	1187	1531	1394
ENSMUSG00000004296	0	0	0	0	0	0
ENSMUSG00000004317	1474	2212	1445	1468	1203	1779
ENSMUSG00000004319	1054	1461	1881	1869	2052	2022
ENSMUSG00000004328	56	56	100	18	2	28
ENSMUSG00000004341	0	0	0	0	0	0
ENSMUSG00000004344	0	0	0	0	18	0
ENSMUSG00000004347	352	430	398	7986	6696	6527
ENSMUSG00000004356	676	1534	1308	2024	1892	2013
ENSMUSG00000004359	0	0	0	0	0	0
ENSMUSG00000004360	1	24	27	74	131	87
ENSMUSG00000004364	2089	3033	3321	4412	3971	4720
ENSMUSG00000004366	0	0	0	0	0	0
ENSMUSG00000004371	31	30	25	0	0	0
ENSMUSG00000004383	810	823	828	883	953	1039
ENSMUSG00000004393	407	944	715	899	1034	1132
ENSMUSG00000004394	1625	2055	1659	2037	2295	2392
ENSMUSG00000004415	1269	2117	1359	4	26	19
ENSMUSG00000004446	85	266	219	292	297	300
ENSMUSG00000004451	1791	1981	2639	1830	1848	1461
ENSMUSG00000004455	1476	1240	1125	1702	1440	2075
ENSMUSG00000004460	2338	2952	2710	2056	2050	2523
ENSMUSG00000004462	326	466	574	679	529	761
ENSMUSG00000004473	1467	2171	1649	90	539	376
ENSMUSG00000004500	103	127	191	266	229	63
ENSMUSG00000004508	2485	2494	2687	846	972	1332
ENSMUSG00000004530	4121	5816	5445	9349	9322	9032
ENSMUSG00000004535	4668	6156	7601	5489	4737	6023
ENSMUSG00000004540	0	0	0	0	1	0
ENSMUSG00000004542	0	0	0	0	0	0
ENSMUSG00000004552	0	0	0	0	0	0
ENSMUSG00000004558	1847	3218	1739	1585	2310	2109
ENSMUSG00000004561	513	722	561	1073	840	1057
ENSMUSG00000004562	5580	5959	5896	6550	6971	6901
ENSMUSG00000004565	1597	1758	1905	1434	1685	1566
ENSMUSG00000004567	1666	1721	1681	2620	2786	2790
ENSMUSG00000004568	1639	1542	1998	1995	2577	2705
ENSMUSG00000004591	2333	2706	2792	3975	3427	4944
ENSMUSG00000004609	43	3	72	0	1	14
ENSMUSG00000004610	3	52	34	54	12	26
ENSMUSG00000004612	0	0	0	0	11	0
ENSMUSG00000004613	0	0	0	0	0	0
ENSMUSG00000004626	500	777	1164	2164	2604	2315
ENSMUSG00000004630	1	0	0	0	13	0
ENSMUSG00000004631	3301	4045	3420	739	1045	1187
ENSMUSG00000004633	314	365	730	31	44	43
ENSMUSG00000004637	278	258	608	460	568	657
ENSMUSG00000004642	1641	1631	1775	3142	2432	3658
ENSMUSG00000004651	290	385	497	6853	6755	7043
ENSMUSG00000004654	0	84	0	0	0	0
ENSMUSG00000004655	77659	95507	100519	1414	4284	4891
ENSMUSG00000004661	452	269	207	726	670	779
ENSMUSG00000004665	1205	2441	2317	2025	2475	2728
ENSMUSG00000004667	1128	1731	2462	3303	3362	2884
ENSMUSG00000004668	0	0	0	0	0	0
ENSMUSG00000004677	2924	3209	3247	5493	4852	5586
ENSMUSG00000004698	60	70	226	13	5	1
ENSMUSG00000004707	0	69	0	0	0	1
ENSMUSG00000004709	2	38	0	28	0	0
ENSMUSG00000004730	131	376	428	1	46	33
ENSMUSG00000004748	49	34	70	78	98	60
ENSMUSG00000004768	641	991	929	654	727	748
ENSMUSG00000004771	1580	2078	1621	1315	947	1045
ENSMUSG00000004788	775	873	932	1493	1753	1416
ENSMUSG00000004789	2605	2772	3325	4521	5122	4941
ENSMUSG00000004791	500	209	196	28	78	3
ENSMUSG00000004798	1344	1862	1772	2059	2240	1485
ENSMUSG00000004814	6	56	104	0	37	0
ENSMUSG00000004815	1259	2144	1483	1994	2294	2437
ENSMUSG00000004821	0	0	0	0	0	0
ENSMUSG00000004837	1001	1452	1097	180	247	202
ENSMUSG00000004842	0	0	0	0	0	0
ENSMUSG00000004843	1138	1618	1645	942	1072	901
ENSMUSG00000004846	3079	4137	4307	3039	3024	2895
ENSMUSG00000004849	902	1453	1107	1236	1003	1404
ENSMUSG00000004864	243	273	455	81	201	142
ENSMUSG00000004865	2080	2380	2716	3703	3139	4545
ENSMUSG00000004872	1119	1571	2306	28045	30381	28449
ENSMUSG00000004880	2611	2493	2141	2271	2362	2939
ENSMUSG00000004885	323	188	339	44	218	228
ENSMUSG00000004891	1332	1720	1096	876	1577	1624
ENSMUSG00000004892	62	74	169	40	124	47
ENSMUSG00000004894	199	141	113	72	121	80
ENSMUSG00000004895	1569	1588	1715	1976	2675	2240
ENSMUSG00000004896	1013	1063	617	1797	1822	1808
ENSMUSG00000004897	3801	4724	5878	5987	6343	7353
ENSMUSG00000004902	0	0	2	6	0	16
ENSMUSG00000004929	467	390	642	1257	1173	1066
ENSMUSG00000004931	1150	1513	1577	1676	1512	1518
ENSMUSG00000004933	26	19	58	31	4	53
ENSMUSG00000004934	1062	1138	1240	1923	2503	2172
ENSMUSG00000004936	1683	1774	1963	2596	3241	2469
ENSMUSG00000004937	2047	2543	2400	4071	5113	4060
ENSMUSG00000004939	0	0	0	0	0	0
ENSMUSG00000004945	893	926	884	709	858	1005
ENSMUSG00000004947	836	746	1068	1667	1528	1858
ENSMUSG00000004948	0	0	0	0	0	0
ENSMUSG00000004951	7624	9838	12927	3283	4905	5294
ENSMUSG00000004952	14428	20228	16508	399	1278	889
ENSMUSG00000004961	0	33	1	13	17	1
ENSMUSG00000004980	22616	29974	26981	41405	39484	46134
ENSMUSG00000004988	0	0	0	22	0	13
ENSMUSG00000004994	146	236	300	370	572	318
ENSMUSG00000004996	387	450	468	597	880	822
ENSMUSG00000005034	2687	3421	3306	3386	4014	3936
ENSMUSG00000005043	830	872	722	286	472	428
ENSMUSG00000005045	0	42	97	17	0	30
ENSMUSG00000005054	1502	1382	1605	693	796	1033
ENSMUSG00000005057	534	657	527	79	49	108
ENSMUSG00000005069	1892	1723	1990	2717	3788	3271
ENSMUSG00000005078	618	951	710	979	863	1148
ENSMUSG00000005087	1823	2535	3408	10305	10242	10717
ENSMUSG00000005089	0	14	0	0	0	0
ENSMUSG00000005102	665	1100	942	1647	1570	2352
ENSMUSG00000005103	2940	4132	4764	8833	8599	10160
ENSMUSG00000005107	278	131	177	903	649	814
ENSMUSG00000005124	191	362	182	6	24	4
ENSMUSG00000005125	15345	17795	18194	9352	11016	11858
ENSMUSG00000005131	26	74	34	30	34	0
ENSMUSG00000005142	1763	2647	2495	2668	3119	3083
ENSMUSG00000005148	3279	2575	2312	1000	2015	2158
ENSMUSG00000005150	548	659	568	965	902	730
ENSMUSG00000005161	1464	1927	1835	1746	1868	2009
ENSMUSG00000005198	7185	11682	11156	14379	15164	14488
ENSMUSG00000005202	0	0	0	0	0	0
ENSMUSG00000005204	1931	1718	2381	2483	2595	2399
ENSMUSG00000005220	424	249	199	1	4	2
ENSMUSG00000005225	635	768	665	2149	2200	2360
ENSMUSG00000005232	0	0	0	0	0	0
ENSMUSG00000005233	9	32	0	0	21	35
ENSMUSG00000005237	116	42	59	45	23	122
ENSMUSG00000005251	589	623	907	412	624	687
ENSMUSG00000005262	851	2264	2073	1805	2309	2499
ENSMUSG00000005267	322	287	283	416	274	231
ENSMUSG00000005268	543	474	1039	332	311	628
ENSMUSG00000005299	1303	2045	1667	2330	2691	2890
ENSMUSG00000005312	1925	3385	3242	3212	3121	3501
ENSMUSG00000005320	158	148	85	14	11	168
ENSMUSG00000005338	3537	4989	4844	199	447	256
ENSMUSG00000005339	0	0	0	0	0	0
ENSMUSG00000005354	1152	1583	1704	1511	1559	1544
ENSMUSG00000005355	78	9	15	0	27	19
ENSMUSG00000005357	0	36	0	0	2	0
ENSMUSG00000005360	522	524	731	44	15	105
ENSMUSG00000005362	436	1140	1130	1190	959	1105
ENSMUSG00000005364	0	0	0	0	0	0
ENSMUSG00000005370	540	756	1037	1757	1475	1849
ENSMUSG00000005371	2521	4049	3521	4909	4612	4236
ENSMUSG00000005373	52	87	51	24	82	96
ENSMUSG00000005374	588	1536	1295	1340	1524	1501
ENSMUSG00000005378	271	643	545	1161	1138	1124
ENSMUSG00000005397	21265	30293	18374	5123	5510	5305
ENSMUSG00000005410	414	256	401	525	852	640
ENSMUSG00000005413	934	924	1274	1031	1091	1580
ENSMUSG00000005417	11242	13903	14269	17074	18722	18476
ENSMUSG00000005442	6922	9173	9300	20222	19051	21390
ENSMUSG00000005447	185	187	124	939	857	768
ENSMUSG00000005465	78	269	197	37	36	57
ENSMUSG00000005469	1281	1717	1936	2467	2250	2407
ENSMUSG00000005470	73	35	28	227	87	20
ENSMUSG00000005474	0	0	0	0	0	0
ENSMUSG00000005481	471	998	1160	1598	2017	2043
ENSMUSG00000005483	9691	11120	16193	13297	18016	18099
ENSMUSG00000005493	0	0	0	0	0	0
ENSMUSG00000005501	764	939	846	1437	1285	1211
ENSMUSG00000005503	0	0	0	0	0	0
ENSMUSG00000005505	421	445	437	398	687	649
ENSMUSG00000005506	3443	5132	3883	6872	5931	6405
ENSMUSG00000005510	403	450	685	708	887	853
ENSMUSG00000005514	1933	2602	2730	3678	4825	3946
ENSMUSG00000005533	1333	2368	1907	4449	3589	4375
ENSMUSG00000005534	3942	6595	4584	3406	4106	3100
ENSMUSG00000005540	0	0	0	0	0	0
ENSMUSG00000005547	0	0	37	0	0	4
ENSMUSG00000005553	29	19	0	0	0	9
ENSMUSG00000005566	5522	5671	6293	8683	10002	10074
ENSMUSG00000005575	1403	1742	1944	2560	2815	2859
ENSMUSG00000005580	699	779	930	2889	2854	2534
ENSMUSG00000005583	1913	2582	1741	3358	3004	3468
ENSMUSG00000005609	960	1052	1296	2368	2448	2520
ENSMUSG00000005610	17336	18421	20164	21497	19893	25419
ENSMUSG00000005611	1	72	73	38	85	67
ENSMUSG00000005615	2500	2380	2500	2718	2608	3335
ENSMUSG00000005621	3088	3426	3025	3050	3619	3858
ENSMUSG00000005625	2054	2880	2615	3575	3452	3506
ENSMUSG00000005628	63	1	22	1	0	64
ENSMUSG00000005640	0	0	0	0	0	0
ENSMUSG00000005649	0	0	0	0	0	0
ENSMUSG00000005656	906	1525	1630	1192	1547	1288
ENSMUSG00000005667	200	193	159	74	153	151
ENSMUSG00000005672	1598	2816	3109	55926	51171	48608
ENSMUSG00000005674	780	878	1053	937	780	864
ENSMUSG00000005677	16	48	31	0	65	32
ENSMUSG00000005681	0	0	0	0	0	0
ENSMUSG00000005682	2136	3292	1960	3880	3891	4009
ENSMUSG00000005683	2796	3588	3948	3786	3984	4794
ENSMUSG00000005686	583	795	868	191	556	427
ENSMUSG00000005687	1540	1623	1832	2698	2518	1988
ENSMUSG00000005696	0	0	0	0	0	0
ENSMUSG00000005698	2348	3494	4140	3845	4064	4385
ENSMUSG00000005699	123	111	354	210	238	268
ENSMUSG00000005705	1	0	1	0	12	8
ENSMUSG00000005716	0	0	0	0	0	0
ENSMUSG00000005718	260	580	886	530	640	841
ENSMUSG00000005732	0	0	0	0	0	0
ENSMUSG00000005763	139	192	84	57	86	138
ENSMUSG00000005774	632	1320	1055	793	961	990
ENSMUSG00000005779	3107	3381	4202	2724	3763	3881
ENSMUSG00000005800	0	0	0	0	0	0
ENSMUSG00000005802	1337	1224	1769	1589	1249	1650
ENSMUSG00000005803	539	851	681	65	43	48
ENSMUSG00000005804	578	578	639	579	572	577
ENSMUSG00000005813	658	1003	869	1255	1106	1082
ENSMUSG00000005823	1902	2019	1745	2474	2373	2793
ENSMUSG00000005824	0	21	25	0	1	0
ENSMUSG00000005836	62	166	170	116	143	57
ENSMUSG00000005846	1315	1229	907	1942	1595	2105
ENSMUSG00000005864	0	0	0	0	0	0
ENSMUSG00000005871	5693	6708	5860	5670	5779	6172
ENSMUSG00000005873	3577	4941	5085	2787	3732	4113
ENSMUSG00000005881	2860	3204	3533	3198	4283	3776
ENSMUSG00000005882	915	521	389	493	741	611
ENSMUSG00000005883	0	0	7	0	0	17
ENSMUSG00000005886	1568	2468	2342	5263	4694	4925
ENSMUSG00000005891	0	0	0	0	0	0
ENSMUSG00000005892	0	0	0	0	0	0
ENSMUSG00000005893	1588	3044	3099	3682	3440	3863
ENSMUSG00000005897	510	693	244	772	897	838
ENSMUSG00000005899	1086	1490	1247	2245	2764	2406
ENSMUSG00000005907	516	734	460	848	534	755
ENSMUSG00000005917	1	34	0	2	6	0
ENSMUSG00000005936	2790	3793	2689	3695	4265	4356
ENSMUSG00000005947	41	6	0	23	33	1
ENSMUSG00000005949	545	792	770	1850	1679	1973
ENSMUSG00000005950	0	31	60	13	0	16
ENSMUSG00000005951	1480	982	694	226	832	326
ENSMUSG00000005952	0	0	0	11	0	0
ENSMUSG00000005958	1245	1397	1471	317	765	898
ENSMUSG00000005968	373	563	917	1988	1879	2090
ENSMUSG00000005973	3203	4224	3261	1132	1491	1473
ENSMUSG00000005980	0	43	14	8	30	18
ENSMUSG00000005981	1765	1982	2968	2784	3981	3194
ENSMUSG00000005982	1038	1438	1203	978	1317	793
ENSMUSG00000005983	174	176	62	102	177	135
ENSMUSG00000005986	84	248	184	334	354	331
ENSMUSG00000005994	3058	3811	7287	71554	63595	75082
ENSMUSG00000006005	4711	5678	4930	7865	7557	7979
ENSMUSG00000006007	0	0	0	0	0	0
ENSMUSG00000006010	927	1642	1928	1316	1196	1228
ENSMUSG00000006014	68	13	31	23	1	16
ENSMUSG00000006019	733	654	965	1329	1293	1321
ENSMUSG00000006021	709	507	794	479	628	600
ENSMUSG00000006024	2288	3343	2407	4055	4960	4708
ENSMUSG00000006050	2597	2812	2955	2476	3372	3660
ENSMUSG00000006056	0	0	0	0	0	0
ENSMUSG00000006057	211	278	199	472	387	366
ENSMUSG00000006058	331	573	448	757	811	749
ENSMUSG00000006095	690	1009	1027	942	956	949
ENSMUSG00000006127	1912	2665	2285	2286	2292	2392
ENSMUSG00000006134	1240	1824	1623	2853	2859	3008
ENSMUSG00000006143	0	33	0	0	0	0
ENSMUSG00000006154	877	731	760	1411	1351	1209
ENSMUSG00000006169	1543	2926	2496	4425	4875	4989
ENSMUSG00000006179	21	24	2	0	0	16
ENSMUSG00000006191	295	526	657	571	776	560
ENSMUSG00000006200	0	0	0	0	0	0
ENSMUSG00000006204	0	0	0	0	0	0
ENSMUSG00000006205	3930	5017	4434	809	1613	1310
ENSMUSG00000006215	1411	1119	1499	2260	1746	1733
ENSMUSG00000006216	0	0	0	0	0	0
ENSMUSG00000006218	0	0	0	0	0	0
ENSMUSG00000006219	187	57	181	41	23	93
ENSMUSG00000006221	0	65	10	0	0	0
ENSMUSG00000006235	47	38	0	0	1	15
ENSMUSG00000006241	58	112	231	147	170	96
ENSMUSG00000006262	988	1030	865	1391	1001	1828
ENSMUSG00000006269	101	303	795	177	387	277
ENSMUSG00000006270	0	0	0	0	0	0
ENSMUSG00000006273	1698	2587	2529	11263	11329	12324
ENSMUSG00000006276	1600	1605	1506	2025	2367	2172
ENSMUSG00000006281	1522	1957	1761	1547	1469	1978
ENSMUSG00000006288	1741	1443	996	1435	1861	1320
ENSMUSG00000006289	528	700	701	890	1109	1121
ENSMUSG00000006299	5197	5911	6018	6006	6354	7472
ENSMUSG00000006301	4071	4814	4646	4517	5620	5259
ENSMUSG00000006304	3391	4613	5310	4750	5170	5443
ENSMUSG00000006307	4136	4593	5741	9572	9478	9718
ENSMUSG00000006310	0	13	0	0	0	0
ENSMUSG00000006311	0	0	0	0	0	0
ENSMUSG00000006313	0	9	1	116	69	36
ENSMUSG00000006315	441	554	1021	563	812	635
ENSMUSG00000006333	7496	7682	11184	8065	11143	9475
ENSMUSG00000006335	581	827	939	555	791	597
ENSMUSG00000006342	817	1449	1451	122	607	488
ENSMUSG00000006344	107	200	283	34	20	24
ENSMUSG00000006345	0	9	0	34	0	0
ENSMUSG00000006356	7895	10401	10919	5010	6508	5568
ENSMUSG00000006360	4440	4424	5793	1876	2623	3053
ENSMUSG00000006362	1715	1946	1941	876	949	890
ENSMUSG00000006369	732	1488	1747	161	531	642
ENSMUSG00000006373	5810	5549	5522	3524	4288	4012
ENSMUSG00000006378	123	183	315	527	779	641
ENSMUSG00000006386	6011	8581	7456	194	908	592
ENSMUSG00000006389	0	0	0	0	0	0
ENSMUSG00000006390	540	1457	1632	2061	2762	2692
ENSMUSG00000006392	548	1026	979	1215	776	1147
ENSMUSG00000006395	1460	2050	936	2108	2285	2704
ENSMUSG00000006398	501	381	439	479	649	888
ENSMUSG00000006403	9229	5625	5727	1096	1482	1525
ENSMUSG00000006411	58	137	194	68	282	299
ENSMUSG00000006412	1510	1993	2030	2942	3481	3145
ENSMUSG00000006418	1388	1696	2143	2295	2101	2117
ENSMUSG00000006423	637	1015	736	1383	1077	1120
ENSMUSG00000006435	1	44	46	0	8	0
ENSMUSG00000006442	749	641	1006	538	627	470
ENSMUSG00000006445	4155	3430	5945	4636	5139	6385
ENSMUSG00000006456	543	771	519	1120	997	1022
ENSMUSG00000006457	37	0	0	22	9	0
ENSMUSG00000006462	15	207	100	0	1	11
ENSMUSG00000006463	110	221	278	322	350	413
ENSMUSG00000006464	326	493	346	488	906	576
ENSMUSG00000006469	0	0	0	0	0	0
ENSMUSG00000006471	1279	1637	1692	2472	2389	2713
ENSMUSG00000006476	2929	3228	2241	5124	4845	4068
ENSMUSG00000006488	0	0	0	0	0	0
ENSMUSG00000006490	0	0	0	0	0	0
ENSMUSG00000006494	1182	1522	1525	418	477	804
ENSMUSG00000006498	10619	9952	12193	11989	11534	14846
ENSMUSG00000006517	224	209	290	408	542	773
ENSMUSG00000006519	1068	1484	1437	1036	1875	1552
ENSMUSG00000006522	2	80	95	0	7	0
ENSMUSG00000006526	527	1161	828	601	580	665
ENSMUSG00000006527	952	779	482	1693	1376	1664
ENSMUSG00000006529	0	0	0	0	0	0
ENSMUSG00000006538	1	0	3	0	2	64
ENSMUSG00000006542	0	0	0	0	18	0
ENSMUSG00000006546	0	0	0	0	0	0
ENSMUSG00000006567	37	25	0	0	0	0
ENSMUSG00000006570	0	0	0	0	0	19
ENSMUSG00000006574	0	0	0	0	0	0
ENSMUSG00000006575	34	13	48	29	23	31
ENSMUSG00000006576	1242	1189	1311	692	608	904
ENSMUSG00000006585	263	375	534	1007	868	1614
ENSMUSG00000006586	1110	1959	1219	24	80	122
ENSMUSG00000006587	0	1	0	13	51	16
ENSMUSG00000006589	543	545	1032	701	827	1011
ENSMUSG00000006599	1122	1435	1271	2733	2819	2851
ENSMUSG00000006611	701	1043	895	576	626	640
ENSMUSG00000006638	112	111	118	118	89	43
ENSMUSG00000006641	263	619	770	911	792	997
ENSMUSG00000006642	0	37	0	0	0	0
ENSMUSG00000006649	0	0	0	0	0	0
ENSMUSG00000006651	114	65	373	14	61	91
ENSMUSG00000006673	1884	2185	2096	2938	2460	3754
ENSMUSG00000006675	394	756	485	230	291	290
ENSMUSG00000006676	5084	6397	6542	10874	11100	12059
ENSMUSG00000006678	471	372	494	614	687	650
ENSMUSG00000006699	5354	7464	7535	6030	6164	6552
ENSMUSG00000006705	551	970	789	999	953	1032
ENSMUSG00000006711	0	0	0	0	0	17
ENSMUSG00000006715	57	68	347	147	157	175
ENSMUSG00000006717	368	293	209	416	459	646
ENSMUSG00000006720	4	64	5	83	40	70
ENSMUSG00000006724	47	29	116	51	78	0
ENSMUSG00000006728	2258	2103	2996	3711	4216	3979
ENSMUSG00000006731	350	250	290	29	100	204
ENSMUSG00000006732	404	400	654	641	320	737
ENSMUSG00000006736	1403	1677	1947	2276	2232	2867
ENSMUSG00000006740	3922	4433	5647	6114	5083	6684
ENSMUSG00000006763	239	351	377	561	474	572
ENSMUSG00000006764	0	0	0	0	0	0
ENSMUSG00000006777	1	0	1	21	1	29
ENSMUSG00000006782	607	810	793	549	843	519
ENSMUSG00000006784	2	18	2	0	96	15
ENSMUSG00000006800	2910	3703	3975	16417	16934	16419
ENSMUSG00000006818	1905	1463	1784	1613	1811	1528
ENSMUSG00000006850	502	675	365	1001	904	506
ENSMUSG00000006906	294	597	369	430	549	500
ENSMUSG00000006920	2913	4350	3191	5108	6039	5478
ENSMUSG00000006930	273	439	428	1107	1624	1223
ENSMUSG00000006931	595	953	913	279	450	564
ENSMUSG00000006932	20291	26456	29612	66889	69197	64991
ENSMUSG00000006941	890	971	1372	756	947	930
ENSMUSG00000006948	0	0	0	0	0	0
ENSMUSG00000006958	235	453	288	63	37	116
ENSMUSG00000006998	3474	3319	3512	4421	5197	5295
ENSMUSG00000007021	0	3	17	50	0	63
ENSMUSG00000007029	2586	3247	3664	2964	3635	3747
ENSMUSG00000007030	2	29	4	44	24	0
ENSMUSG00000007033	62	33	152	164	202	12
ENSMUSG00000007034	0	2	0	16	27	0
ENSMUSG00000007035	266	171	209	296	458	290
ENSMUSG00000007036	2464	2698	3949	1979	2916	2549
ENSMUSG00000007038	1788	1967	1819	3010	2924	3093
ENSMUSG00000007039	3813	3061	2459	598	708	736
ENSMUSG00000007041	3379	4288	4558	2515	2877	4132
ENSMUSG00000007050	124	167	283	597	424	645
ENSMUSG00000007080	88	60	294	108	287	252
ENSMUSG00000007097	3830	3109	1690	65	310	228
ENSMUSG00000007107	0	0	0	0	0	0
ENSMUSG00000007122	1	9	0	0	2	12
ENSMUSG00000007207	345	672	274	644	615	818
ENSMUSG00000007209	0	0	0	0	0	0
ENSMUSG00000007216	140	177	242	205	271	359
ENSMUSG00000007279	76	71	77	70	125	153
ENSMUSG00000007338	617	826	563	739	804	577
ENSMUSG00000007379	635	479	595	753	1047	826
ENSMUSG00000007411	2317	2831	2619	4489	4141	5074
ENSMUSG00000007415	1063	1695	1621	1338	1146	1214
ENSMUSG00000007440	0	35	0	0	0	9
ENSMUSG00000007457	0	0	0	0	0	0
ENSMUSG00000007458	1797	2486	2072	3597	3783	3664
ENSMUSG00000007476	373	728	1148	356	334	315
ENSMUSG00000007480	0	1	25	25	79	6
ENSMUSG00000007564	3686	3993	4880	5188	5268	5299
ENSMUSG00000007570	477	938	787	1697	2043	1654
ENSMUSG00000007589	726	691	805	1024	1090	1173
ENSMUSG00000007591	40	21	1	63	48	39
ENSMUSG00000007594	0	47	25	0	0	0
ENSMUSG00000007603	1641	1994	2270	2333	2822	2379
ENSMUSG00000007610	767	753	999	908	1088	966
ENSMUSG00000007613	1777	1966	1843	4019	2848	3621
ENSMUSG00000007617	473	1144	1184	945	962	1317
ENSMUSG00000007646	61	28	154	228	62	318
ENSMUSG00000007653	1	32	65	140	172	146
ENSMUSG00000007655	12837	17508	16620	2261	4002	4682
ENSMUSG00000007656	2296	2241	3096	2697	2847	2989
ENSMUSG00000007659	1673	2145	2678	857	1273	1508
ENSMUSG00000007670	4230	4385	4656	7513	7710	7521
ENSMUSG00000007682	1	26	1	0	73	31
ENSMUSG00000007721	1327	1969	2185	2010	2461	2607
ENSMUSG00000007739	2394	3156	3649	4340	4230	5207
ENSMUSG00000007777	177	261	429	317	166	164
ENSMUSG00000007783	830	1080	780	44	300	91
ENSMUSG00000007805	627	651	422	22	83	65
ENSMUSG00000007812	435	1221	816	2021	1561	1497
ENSMUSG00000007815	8090	10827	10667	10685	9981	11938
ENSMUSG00000007817	4771	7122	6283	5849	6402	6008
ENSMUSG00000007827	685	708	833	1139	826	1055
ENSMUSG00000007833	1035	916	1205	1766	1608	2074
ENSMUSG00000007836	7758	9381	10448	10125	12303	12111
ENSMUSG00000007837	343	524	577	312	264	358
ENSMUSG00000007850	26047	29716	26161	44194	32913	45737
ENSMUSG00000007867	729	788	905	601	699	534
ENSMUSG00000007872	8702	8353	10605	15567	13145	19421
ENSMUSG00000007877	0	0	0	8	1	20
ENSMUSG00000007880	5500	6833	6531	10744	11165	10697
ENSMUSG00000007888	194	191	202	127	82	134
ENSMUSG00000007891	8073	9426	10171	11645	14523	14460
ENSMUSG00000007892	3135	2937	4081	3957	5046	4860
ENSMUSG00000007907	0	0	0	0	0	0
ENSMUSG00000007908	393	436	127	7	7	25
ENSMUSG00000007944	0	5	0	29	0	0
ENSMUSG00000007946	0	18	1	0	0	29
ENSMUSG00000007950	645	905	662	864	772	763
ENSMUSG00000007987	159	495	506	819	945	770
ENSMUSG00000007989	272	282	483	638	624	936
ENSMUSG00000008028	12	0	26	0	0	5
ENSMUSG00000008035	2755	3965	2923	4997	5995	5030
ENSMUSG00000008036	937	703	1154	1160	1298	881
ENSMUSG00000008090	601	575	404	132	215	374
ENSMUSG00000008129	0	0	24	70	107	96
ENSMUSG00000008136	71	80	37	2	47	53
ENSMUSG00000008140	3162	3324	4046	2744	3047	2850
ENSMUSG00000008153	2	75	108	95	154	44
ENSMUSG00000008167	613	497	666	916	927	908
ENSMUSG00000008193	1	14	45	0	3	15
ENSMUSG00000008200	4357	4473	4325	7521	6861	7690
ENSMUSG00000008206	2810	3186	3475	5555	6746	6438
ENSMUSG00000008226	474	402	225	438	521	453
ENSMUSG00000008301	244	543	887	688	567	757
ENSMUSG00000008305	1879	2105	2109	2122	1894	1984
ENSMUSG00000008307	4	105	5	320	174	297
ENSMUSG00000008318	229	158	142	186	109	139
ENSMUSG00000008333	392	895	771	551	762	781
ENSMUSG00000008348	43490	38641	51387	53531	55514	70937
ENSMUSG00000008373	566	998	1324	1432	1623	1641
ENSMUSG00000008384	5952	5436	8463	4247	5685	6490
ENSMUSG00000008393	3288	2925	2616	1145	1501	1600
ENSMUSG00000008398	3770	6368	5639	2640	3064	2892
ENSMUSG00000008429	1294	2039	2302	3013	2795	2761
ENSMUSG00000008435	541	598	703	1129	991	817
ENSMUSG00000008438	0	0	1	11	23	0
ENSMUSG00000008450	80	191	148	198	211	163
ENSMUSG00000008461	0	17	63	0	0	18
ENSMUSG00000008475	3402	3939	3347	4363	4742	4647
ENSMUSG00000008482	0	0	0	0	0	0
ENSMUSG00000008489	0	17	2	0	0	27
ENSMUSG00000008496	26	50	59	9	127	29
ENSMUSG00000008540	603	1110	1091	941	1064	1232
ENSMUSG00000008575	7856	9529	10344	4688	5438	7393
ENSMUSG00000008590	0	0	0	0	0	0
ENSMUSG00000008601	77	84	197	95	114	144
ENSMUSG00000008604	1619	2279	2509	4159	4274	4234
ENSMUSG00000008658	72	50	29	0	5	0
ENSMUSG00000008668	1255	1205	1512	2301	2927	2744
ENSMUSG00000008682	1964	2261	1815	2415	2791	3755
ENSMUSG00000008683	1159	1181	1225	3434	2534	2544
ENSMUSG00000008690	1912	2091	2806	2725	3264	3612
ENSMUSG00000008730	7119	8876	7466	8682	7481	7742
ENSMUSG00000008734	4768	6848	6128	5349	4786	4362
ENSMUSG00000008763	1602	2294	1990	1785	1660	2049
ENSMUSG00000008789	0	0	0	0	0	0
ENSMUSG00000008813	0	0	0	0	0	0
ENSMUSG00000008822	151	277	157	238	262	242
ENSMUSG00000008843	0	0	0	0	0	0
ENSMUSG00000008845	477	661	857	30	58	52
ENSMUSG00000008855	4423	5082	5084	11341	11345	11675
ENSMUSG00000008859	683	1078	1356	1053	1133	1323
ENSMUSG00000008874	0	0	0	0	0	0
ENSMUSG00000008892	306	316	328	518	443	526
ENSMUSG00000008932	1	0	21	0	0	0
ENSMUSG00000008958	1489	1299	1722	1870	1772	1973
ENSMUSG00000008976	1412	2190	1976	2094	2343	2238
ENSMUSG00000008999	2215	3624	2667	256	567	586
ENSMUSG00000009013	3104	3222	3283	3602	3452	4925
ENSMUSG00000009030	1373	1202	1109	1253	920	1178
ENSMUSG00000009035	2315	2650	2753	1436	1511	2009
ENSMUSG00000009047	0	0	0	0	0	0
ENSMUSG00000009070	0	0	0	0	0	0
ENSMUSG00000009073	2491	4350	4367	5423	5477	6101
ENSMUSG00000009075	0	0	0	0	16	0
ENSMUSG00000009076	309	363	780	587	470	376
ENSMUSG00000009079	6628	6729	5347	11671	10702	10553
ENSMUSG00000009090	922	1208	1958	2126	2279	2876
ENSMUSG00000009092	0	1	0	1	74	44
ENSMUSG00000009093	0	6	0	0	0	0
ENSMUSG00000009097	3333	3314	5735	1153	1834	1923
ENSMUSG00000009108	2	81	0	0	1	2
ENSMUSG00000009112	982	1238	1771	1709	1881	2109
ENSMUSG00000009114	0	0	0	0	0	0
ENSMUSG00000009115	1	0	28	16	99	0
ENSMUSG00000009145	186	241	209	245	363	207
ENSMUSG00000009185	31	118	371	0	1	41
ENSMUSG00000009207	184	331	497	704	399	614
ENSMUSG00000009210	0	1	42	0	4	0
ENSMUSG00000009214	0	0	0	0	0	0
ENSMUSG00000009216	0	0	0	0	0	0
ENSMUSG00000009246	0	0	0	26	58	17
ENSMUSG00000009248	53	4	104	0	3	34
ENSMUSG00000009281	3381	3037	2474	40	254	470
ENSMUSG00000009291	9186	9905	7448	5201	6277	5474
ENSMUSG00000009292	0	0	0	0	0	0
ENSMUSG00000009293	1568	1423	2037	1526	1717	1559
ENSMUSG00000009350	1	0	0	13	0	0
ENSMUSG00000009356	0	0	0	9	0	0
ENSMUSG00000009376	658	945	1120	6563	5851	6667
ENSMUSG00000009378	106	94	202	32	27	19
ENSMUSG00000009394	213	237	60	37	2	3
ENSMUSG00000009406	558	1027	560	963	1031	1000
ENSMUSG00000009418	11421	13084	9327	16607	15070	15515
ENSMUSG00000009470	3298	4719	3753	4491	4867	5308
ENSMUSG00000009471	0	0	0	0	0	0
ENSMUSG00000009487	0	0	0	0	0	0
ENSMUSG00000009535	520	734	676	1187	694	1279
ENSMUSG00000009545	81	111	129	12	5	29
ENSMUSG00000009549	1079	1026	1743	1724	1937	1890
ENSMUSG00000009551	48	19	27	0	29	6
ENSMUSG00000009555	1902	2235	2690	5270	4953	6038
ENSMUSG00000009563	510	773	862	831	653	723
ENSMUSG00000009566	883	917	1015	1607	1547	2193
ENSMUSG00000009569	3136	3991	3053	3157	2889	3011
ENSMUSG00000009575	3430	4635	3507	6446	5841	7142
ENSMUSG00000009580	0	0	0	0	0	0
ENSMUSG00000009585	1047	1808	1642	243	433	330
ENSMUSG00000009588	0	0	0	0	0	0
ENSMUSG00000009596	0	0	0	0	0	0
ENSMUSG00000009614	1991	1278	1862	511	1060	824
ENSMUSG00000009621	1459	2129	1797	1720	1480	1437
ENSMUSG00000009628	0	19	0	1	0	0
ENSMUSG00000009630	2211	2276	2289	2348	2324	2275
ENSMUSG00000009633	745	602	939	314	455	530
ENSMUSG00000009640	463	512	1029	540	697	646
ENSMUSG00000009646	0	0	0	0	0	0
ENSMUSG00000009647	801	711	462	358	443	530
ENSMUSG00000009654	1	0	0	0	0	6
ENSMUSG00000009670	0	0	0	0	0	0
ENSMUSG00000009681	5193	6033	7081	3747	4507	5179
ENSMUSG00000009687	1419	2153	2143	406	730	767
ENSMUSG00000009731	266	242	220	27	22	47
ENSMUSG00000009733	730	710	781	1576	1761	1286
ENSMUSG00000009734	0	0	17	0	0	0
ENSMUSG00000009739	1645	2453	2315	5148	4219	4592
ENSMUSG00000009741	3683	5043	4084	6908	5755	7325
ENSMUSG00000009772	403	482	720	67	167	111
ENSMUSG00000009828	1363	1532	1013	1747	1538	1528
ENSMUSG00000009863	1314	1404	1479	1219	1954	1497
ENSMUSG00000009876	92	38	2	17	12	104
ENSMUSG00000009894	306	346	822	337	491	381
ENSMUSG00000009900	64	50	0	0	42	18
ENSMUSG00000009905	1158	1054	1481	3085	2610	3227
ENSMUSG00000009907	1606	1645	1950	2372	2155	2463
ENSMUSG00000009927	421	479	459	635	497	545
ENSMUSG00000009941	0	53	83	0	1	2
ENSMUSG00000009995	1560	1917	1417	3189	3383	3198
ENSMUSG00000010021	0	59	58	28	150	65
ENSMUSG00000010025	1380	1965	1718	1664	1937	1609
ENSMUSG00000010044	45	12	78	183	97	151
ENSMUSG00000010045	403	666	918	745	1036	783
ENSMUSG00000010047	980	1049	1756	512	380	511
ENSMUSG00000010048	600	434	538	721	1102	874
ENSMUSG00000010051	404	463	452	217	319	225
ENSMUSG00000010054	756	942	965	976	897	788
ENSMUSG00000010057	158	246	456	711	842	1208
ENSMUSG00000010064	0	0	0	0	0	0
ENSMUSG00000010066	72	75	0	18	10	23
ENSMUSG00000010067	3380	3072	3673	3757	3898	5148
ENSMUSG00000010080	190	183	439	154	164	263
ENSMUSG00000010086	0	24	0	0	40	0
ENSMUSG00000010095	8461	9420	10668	13699	14640	15491
ENSMUSG00000010097	7300	8112	7360	13161	13275	13115
ENSMUSG00000010110	2777	2940	3792	4079	3927	4243
ENSMUSG00000010122	1	2	58	0	0	8
ENSMUSG00000010136	0	0	0	0	0	0
ENSMUSG00000010142	0	22	45	1	1	0
ENSMUSG00000010154	218	69	183	68	131	54
ENSMUSG00000010175	4448	4877	5683	1200	2175	2362
ENSMUSG00000010205	1381	1823	2045	2499	2136	1911
ENSMUSG00000010277	6937	8586	7722	11712	10590	10999
ENSMUSG00000010290	702	648	529	548	562	483
ENSMUSG00000010307	393	398	463	155	152	239
ENSMUSG00000010311	51	48	54	40	20	29
ENSMUSG00000010342	71	37	29	27	9	36
ENSMUSG00000010358	709	871	827	1526	1395	1228
ENSMUSG00000010362	193	563	648	922	827	857
ENSMUSG00000010376	1767	1821	2057	1719	2498	2147
ENSMUSG00000010392	1200	1691	1736	1625	1725	1851
ENSMUSG00000010406	967	450	704	984	924	817
ENSMUSG00000010435	0	0	0	0	0	0
ENSMUSG00000010453	2321	3444	3008	5516	5391	5610
ENSMUSG00000010461	0	0	0	0	0	0
ENSMUSG00000010476	1188	2063	1830	48	183	121
ENSMUSG00000010492	32	71	23	11	17	0
ENSMUSG00000010505	0	0	0	0	0	0
ENSMUSG00000010517	888	1456	1022	1756	1616	1465
ENSMUSG00000010529	0	18	0	0	0	1
ENSMUSG00000010538	0	0	60	14	16	15
ENSMUSG00000010554	988	1254	991	1329	1368	1410
ENSMUSG00000010592	0	0	0	0	0	0
ENSMUSG00000010601	0	0	49	0	1	0
ENSMUSG00000010607	103	195	150	260	384	197
ENSMUSG00000010608	5795	6936	7134	12805	9629	11374
ENSMUSG00000010609	1194	1698	2100	4459	4805	4614
ENSMUSG00000010651	0	3	86	86	28	292
ENSMUSG00000010660	1161	1202	988	1005	1142	1277
ENSMUSG00000010663	2101	2739	2584	2992	3747	3253
ENSMUSG00000010721	662	1240	793	423	705	456
ENSMUSG00000010751	297	562	325	208	220	218
ENSMUSG00000010755	976	895	856	1448	1381	1617
ENSMUSG00000010760	2	16	69	25	55	17
ENSMUSG00000010796	0	0	0	0	0	0
ENSMUSG00000010797	0	7	0	19	1	23
ENSMUSG00000010803	1	0	0	13	112	0
ENSMUSG00000010825	21	1	28	44	1	0
ENSMUSG00000010830	916	1111	614	87	86	91
ENSMUSG00000010841	0	0	0	1	36	0
ENSMUSG00000010911	494	360	353	427	542	635
ENSMUSG00000010914	453	486	325	696	632	828
ENSMUSG00000010936	429	701	1004	1741	1749	1865
ENSMUSG00000011008	109	106	210	1764	1137	1777
ENSMUSG00000011034	0	37	39	1	1	0
ENSMUSG00000011052	0	0	0	0	0	0
ENSMUSG00000011096	1882	2043	2346	2793	2660	3073
ENSMUSG00000011114	1439	2138	2488	1363	1704	1610
ENSMUSG00000011118	0	0	32	18	75	17
ENSMUSG00000011148	162	108	210	1348	1543	1525
ENSMUSG00000011154	0	0	0	0	0	0
ENSMUSG00000011158	2473	2326	2008	4379	4155	4076
ENSMUSG00000011171	0	43	37	46	61	42
ENSMUSG00000011179	2792	2684	3560	2650	2869	3280
ENSMUSG00000011254	322	271	295	419	334	393
ENSMUSG00000011256	5005	6728	3439	47	186	148
ENSMUSG00000011257	1181	1167	1264	1111	1273	1405
ENSMUSG00000011263	1008	966	1914	34	176	185
ENSMUSG00000011267	232	277	210	35	306	278
ENSMUSG00000011305	49	109	35	1	3	14
ENSMUSG00000011306	934	1086	1667	1657	1569	1305
ENSMUSG00000011349	0	0	0	0	0	0
ENSMUSG00000011350	0	0	0	0	0	0
ENSMUSG00000011382	324	759	634	228	378	210
ENSMUSG00000011427	251	434	432	557	415	510
ENSMUSG00000011463	0	0	0	0	0	0
ENSMUSG00000011486	0	0	0	0	0	0
ENSMUSG00000011589	80	25	0	0	3	0
ENSMUSG00000011632	1	0	50	0	1	0
ENSMUSG00000011658	308	907	584	672	772	695
ENSMUSG00000011751	0	27	0	1	1	10
ENSMUSG00000011752	195	146	235	358	355	453
ENSMUSG00000011831	550	2112	1062	1303	1226	1788
ENSMUSG00000011832	853	1697	1504	1940	2056	1925
ENSMUSG00000011837	318	303	622	297	402	452
ENSMUSG00000011877	4501	5780	6185	4037	5143	4527
ENSMUSG00000011884	1051	1393	1937	906	1118	1250
ENSMUSG00000011958	3033	3594	3853	4102	3654	3532
ENSMUSG00000011960	1681	2315	1785	3813	3531	3520
ENSMUSG00000012017	4407	4475	3033	340	529	337
ENSMUSG00000012042	0	0	0	0	0	0
ENSMUSG00000012076	763	827	925	1209	1285	905
ENSMUSG00000012114	1795	2497	3019	2950	3196	4098
ENSMUSG00000012117	659	1119	1234	1487	1795	1696
ENSMUSG00000012123	93	260	406	166	229	223
ENSMUSG00000012126	86	185	161	295	255	290
ENSMUSG00000012187	1	2	1	32	0	20
ENSMUSG00000012211	0	0	0	0	0	0
ENSMUSG00000012282	0	0	0	0	0	0
ENSMUSG00000012296	1086	1661	1502	1409	1588	1691
ENSMUSG00000012350	77	33	31	71	124	247
ENSMUSG00000012396	0	0	0	0	0	0
ENSMUSG00000012405	1468	1327	1435	1746	2148	2271
ENSMUSG00000012422	1091	1271	1114	659	844	1077
ENSMUSG00000012428	6393	8590	6569	209	657	626
ENSMUSG00000012429	208	415	448	233	223	432
ENSMUSG00000012443	147	56	1	94	116	82
ENSMUSG00000012483	109	223	126	177	200	145
ENSMUSG00000012519	228	470	468	169	99	304
ENSMUSG00000012520	0	0	0	0	0	0
ENSMUSG00000012535	2110	2624	2264	3114	4235	3732
ENSMUSG00000012609	895	638	523	1033	963	1246
ENSMUSG00000012640	320	527	566	1797	969	1165
ENSMUSG00000012705	1	12	0	0	0	0
ENSMUSG00000012777	0	0	0	0	0	0
ENSMUSG00000012819	0	12	0	0	15	16
ENSMUSG00000012848	6391	7046	9943	7429	10546	10070
ENSMUSG00000012889	0	0	0	0	0	0
ENSMUSG00000013033	1413	1924	1908	3178	2933	3018
ENSMUSG00000013076	6873	9912	8638	4675	6340	5811
ENSMUSG00000013083	0	0	0	0	0	0
ENSMUSG00000013089	895	1621	1562	676	773	749
ENSMUSG00000013091	0	16	0	0	0	0
ENSMUSG00000013150	424	422	514	281	345	375
ENSMUSG00000013155	316	140	347	409	349	496
ENSMUSG00000013158	0	0	0	13	0	0
ENSMUSG00000013160	889	1078	734	1989	1679	1592
ENSMUSG00000013236	5438	6537	6697	6445	8892	9172
ENSMUSG00000013275	8950	7704	10772	5909	6757	8120
ENSMUSG00000013338	0	37	0	0	0	0
ENSMUSG00000013353	0	0	0	0	0	0
ENSMUSG00000013367	427	111	129	20	12	55
ENSMUSG00000013415	0	0	0	0	0	1
ENSMUSG00000013418	1	0	0	20	0	0
ENSMUSG00000013419	1780	2325	2107	1454	1748	1639
ENSMUSG00000013465	2670	3347	2535	3893	3781	4161
ENSMUSG00000013483	1	32	1	20	70	35
ENSMUSG00000013495	378	558	962	437	835	507
ENSMUSG00000013523	192	214	298	13	140	70
ENSMUSG00000013539	0	0	0	0	0	0
ENSMUSG00000013562	0	0	0	0	0	0
ENSMUSG00000013584	70	81	105	1	20	3
ENSMUSG00000013593	4050	4431	4251	4888	5385	5326
ENSMUSG00000013611	0	0	0	0	0	0
ENSMUSG00000013622	1424	1811	1638	1696	1775	1820
ENSMUSG00000013629	1442	2686	2633	4506	4241	3817
ENSMUSG00000013643	0	0	0	0	0	0
ENSMUSG00000013646	1157	889	1116	1365	1597	1498
ENSMUSG00000013653	0	0	0	0	0	0
ENSMUSG00000013662	1074	2416	2190	3200	2769	3193
ENSMUSG00000013663	4434	6032	5445	11418	9218	11640
ENSMUSG00000013668	0	0	0	0	0	0
ENSMUSG00000013698	4421	5128	6173	2860	3267	2766
ENSMUSG00000013701	458	242	245	313	396	250
ENSMUSG00000013707	1	0	16	5	0	0
ENSMUSG00000013736	302	548	880	1030	958	1323
ENSMUSG00000013766	26	34	24	0	0	0
ENSMUSG00000013787	5154	6651	6985	8757	10158	9600
ENSMUSG00000013822	218	297	511	379	421	647
ENSMUSG00000013833	843	1400	1565	1475	2154	1239
ENSMUSG00000013846	2570	3558	2962	6250	7043	5951
ENSMUSG00000013858	4224	4684	4853	6809	8133	7333
ENSMUSG00000013878	327	447	447	364	672	545
ENSMUSG00000013921	861	1593	1271	110	356	181
ENSMUSG00000013928	0	28	0	0	0	0
ENSMUSG00000013936	0	0	0	0	0	0
ENSMUSG00000013973	891	1209	930	1865	1754	1737
ENSMUSG00000013974	0	0	0	0	0	0
ENSMUSG00000013997	555	1181	583	995	1156	1425
ENSMUSG00000014030	0	0	0	0	0	0
ENSMUSG00000014039	300	557	674	963	988	841
ENSMUSG00000014074	1016	1238	991	1062	1355	971
ENSMUSG00000014075	49	136	168	143	216	150
ENSMUSG00000014077	1616	2007	2467	2855	2893	3193
ENSMUSG00000014104	0	0	0	0	0	0
ENSMUSG00000014158	1671	2095	2515	920	1109	1407
ENSMUSG00000014164	850	1130	1113	68	159	140
ENSMUSG00000014177	1243	1451	1472	1224	827	1064
ENSMUSG00000014195	3980	5548	4545	7036	6293	7093
ENSMUSG00000014198	0	32	30	67	35	78
ENSMUSG00000014226	759	746	1632	1860	1530	1801
ENSMUSG00000014232	155	369	317	328	487	421
ENSMUSG00000014243	96	67	172	133	140	73
ENSMUSG00000014245	128	253	138	378	307	524
ENSMUSG00000014294	460	633	558	784	709	703
ENSMUSG00000014301	13	72	54	85	80	78
ENSMUSG00000014303	1933	2472	1529	120	145	336
ENSMUSG00000014313	2360	1709	2868	1289	1745	1959
ENSMUSG00000014329	3850	6077	2306	41	139	115
ENSMUSG00000014349	2764	2800	2804	3141	3207	3648
ENSMUSG00000014351	0	0	0	0	0	0
ENSMUSG00000014353	2054	2517	2536	3400	2425	3338
ENSMUSG00000014355	3769	4843	4993	5205	5945	6384
ENSMUSG00000014361	952	1410	1272	434	487	782
ENSMUSG00000014402	414	805	867	974	762	1075
ENSMUSG00000014418	1193	1900	1718	2218	2037	2506
ENSMUSG00000014426	774	1764	1868	2785	2490	3101
ENSMUSG00000014444	11293	11710	11917	13691	15066	15786
ENSMUSG00000014453	0	0	0	0	0	0
ENSMUSG00000014470	905	1097	636	1040	1145	949
ENSMUSG00000014496	1725	2472	2323	8474	5833	7491
ENSMUSG00000014498	2430	2734	2359	4535	4330	4698
ENSMUSG00000014503	31	76	72	64	70	26
ENSMUSG00000014504	413	758	487	850	507	900
ENSMUSG00000014529	0	0	0	0	0	0
ENSMUSG00000014542	0	0	0	0	0	0
ENSMUSG00000014543	0	0	0	0	0	0
ENSMUSG00000014547	272	539	738	611	548	706
ENSMUSG00000014550	1385	1926	1998	2573	2806	2728
ENSMUSG00000014551	343	572	436	380	635	642
ENSMUSG00000014554	743	793	808	798	843	996
ENSMUSG00000014592	763	897	1052	1652	2089	1866
ENSMUSG00000014599	2927	4005	3752	1373	1719	1850
ENSMUSG00000014601	1155	1460	1624	1954	2410	2163
ENSMUSG00000014602	57	156	141	5	40	102
ENSMUSG00000014603	0	0	36	0	0	0
ENSMUSG00000014606	1196	1582	1470	980	1359	1565
ENSMUSG00000014609	0	34	0	0	0	0
ENSMUSG00000014633	220	133	92	147	184	278
ENSMUSG00000014668	979	1236	1143	1664	1781	2023
ENSMUSG00000014686	0	0	44	0	8	0
ENSMUSG00000014704	31	55	9	0	21	0
ENSMUSG00000014725	0	0	0	0	0	0
ENSMUSG00000014747	0	0	0	5	0	0
ENSMUSG00000014748	1806	2307	2260	2784	3280	2541
ENSMUSG00000014763	692	1095	832	1198	1320	1272
ENSMUSG00000014767	448	830	511	669	703	928
ENSMUSG00000014769	1133	1158	1455	1308	1230	1734
ENSMUSG00000014771	178	290	345	259	480	370
ENSMUSG00000014773	1690	2099	2770	162	421	429
ENSMUSG00000014776	71	112	100	78	73	129
ENSMUSG00000014778	997	1183	915	1885	2050	1908
ENSMUSG00000014782	0	0	0	0	0	0
ENSMUSG00000014786	103	204	58	191	101	173
ENSMUSG00000014791	387	508	614	113	282	420
ENSMUSG00000014813	627	382	458	25	84	122
ENSMUSG00000014837	100	150	217	114	282	58
ENSMUSG00000014846	2433	2628	2822	1045	1609	1499
ENSMUSG00000014850	397	407	935	543	449	320
ENSMUSG00000014852	0	0	0	0	0	0
ENSMUSG00000014856	163	590	604	690	984	990
ENSMUSG00000014859	767	1399	1639	1597	1940	2069
ENSMUSG00000014867	4127	5463	5698	3163	4118	3936
ENSMUSG00000014873	462	1190	884	2180	1583	2043
ENSMUSG00000014905	3161	2721	4255	4013	4356	5710
ENSMUSG00000014907	123	335	328	654	408	499
ENSMUSG00000014932	1327	1428	1699	1727	1526	1709
ENSMUSG00000014956	4055	5386	4372	6098	5971	6962
ENSMUSG00000014959	2182	2542	2370	2580	2527	2340
ENSMUSG00000014980	114	233	199	167	270	282
ENSMUSG00000015001	0	0	0	0	0	0
ENSMUSG00000015002	2139	3010	2513	2337	2366	2765
ENSMUSG00000015013	403	532	588	687	778	638
ENSMUSG00000015016	320	279	373	450	509	466
ENSMUSG00000015023	894	894	918	1171	1361	1392
ENSMUSG00000015027	157	200	447	525	481	442
ENSMUSG00000015053	3378	3561	4593	492	992	1269
ENSMUSG00000015083	0	0	1	29	50	46
ENSMUSG00000015085	4494	6136	4496	99	470	213
ENSMUSG00000015087	2224	2463	2379	3458	3532	3315
ENSMUSG00000015090	976	900	1195	15328	17154	15806
ENSMUSG00000015092	1116	1128	1397	1471	1557	1424
ENSMUSG00000015093	0	92	1	26	88	51
ENSMUSG00000015094	3430	4315	4044	2031	2783	2107
ENSMUSG00000015095	1148	1590	1247	1845	2661	1798
ENSMUSG00000015112	4	64	34	98	51	92
ENSMUSG00000015120	3254	3351	2793	5710	4292	5228
ENSMUSG00000015126	431	338	303	441	530	387
ENSMUSG00000015127	218	829	821	917	1366	1006
ENSMUSG00000015133	1591	2655	2561	163	417	343
ENSMUSG00000015134	351	205	139	3	94	162
ENSMUSG00000015143	5309	6635	7939	2471	3310	3592
ENSMUSG00000015149	2201	3256	3023	4318	5949	5325
ENSMUSG00000015165	13061	12504	15071	21867	23685	27024
ENSMUSG00000015176	1746	2678	1964	2414	2935	3161
ENSMUSG00000015189	1338	1188	883	1065	1188	1115
ENSMUSG00000015202	1672	1656	1306	452	446	528
ENSMUSG00000015214	678	1165	775	703	856	1140
ENSMUSG00000015217	240	190	235	56	193	143
ENSMUSG00000015222	360	622	286	49	156	141
ENSMUSG00000015224	652	540	321	519	752	751
ENSMUSG00000015242	0	0	0	0	0	0
ENSMUSG00000015243	6282	8907	8323	4182	4044	4604
ENSMUSG00000015247	465	461	348	571	570	301
ENSMUSG00000015289	472	525	699	437	537	617
ENSMUSG00000015290	667	867	971	1000	1216	1115
ENSMUSG00000015291	5577	6956	6192	9426	10745	9724
ENSMUSG00000015305	6900	8920	6625	6808	6538	6267
ENSMUSG00000015312	15484	13046	21902	9908	9365	14396
ENSMUSG00000015314	38	0	0	1	0	0
ENSMUSG00000015316	0	0	0	0	0	0
ENSMUSG00000015335	58	175	108	87	168	60
ENSMUSG00000015337	119	107	35	123	81	168
ENSMUSG00000015340	504	309	607	1	33	4
ENSMUSG00000015341	1595	2161	1421	3311	3226	4389
ENSMUSG00000015342	66	60	19	18	55	66
ENSMUSG00000015354	736	603	789	5688	5285	5935
ENSMUSG00000015355	1	75	53	0	0	0
ENSMUSG00000015357	1121	1270	1754	1877	1824	1841
ENSMUSG00000015363	1032	1604	1175	2204	2128	1952
ENSMUSG00000015365	0	0	0	0	0	0
ENSMUSG00000015377	696	942	1200	2167	1599	1522
ENSMUSG00000015396	199	102	211	3	12	15
ENSMUSG00000015401	0	0	0	0	0	0
ENSMUSG00000015405	64	78	24	0	40	24
ENSMUSG00000015437	0	0	0	0	0	0
ENSMUSG00000015441	0	0	0	0	0	0
ENSMUSG00000015443	0	0	0	0	0	0
ENSMUSG00000015451	130	71	84	251	161	237
ENSMUSG00000015452	176	118	260	3	62	154
ENSMUSG00000015461	1734	2105	1956	1820	2269	2560
ENSMUSG00000015467	128	267	326	421	432	424
ENSMUSG00000015468	525	497	345	136	422	389
ENSMUSG00000015474	139	334	392	409	505	490
ENSMUSG00000015476	409	456	403	196	161	269
ENSMUSG00000015478	336	655	674	1287	1308	1120
ENSMUSG00000015484	0	0	0	0	0	0
ENSMUSG00000015488	1104	1462	822	1130	1077	1421
ENSMUSG00000015501	2061	2385	2046	3067	2601	3466
ENSMUSG00000015519	0	0	0	0	0	0
ENSMUSG00000015522	2767	4730	3366	4498	4156	4455
ENSMUSG00000015533	160	371	671	132	270	187
ENSMUSG00000015536	1226	1613	1310	1385	1784	2013
ENSMUSG00000015542	307	533	444	643	903	725
ENSMUSG00000015568	1718	2787	2371	323	479	453
ENSMUSG00000015575	844	1277	1350	977	1226	1386
ENSMUSG00000015579	0	0	0	0	0	0
ENSMUSG00000015597	1182	1773	1571	3397	2783	3942
ENSMUSG00000015599	0	0	0	11	0	19
ENSMUSG00000015605	4975	4957	6220	15200	17701	19173
ENSMUSG00000015619	441	542	1381	516	918	1367
ENSMUSG00000015627	0	0	0	0	0	0
ENSMUSG00000015647	6985	8594	10447	1688	3602	4285
ENSMUSG00000015652	0	0	60	0	1	0
ENSMUSG00000015653	215	334	204	55	80	78
ENSMUSG00000015656	12303	12414	16382	12668	16931	18634
ENSMUSG00000015659	275	392	491	1203	1238	1139
ENSMUSG00000015665	0	0	29	0	28	6
ENSMUSG00000015668	396	774	602	416	597	519
ENSMUSG00000015671	1020	1361	1626	1517	1878	1615
ENSMUSG00000015672	10	275	190	254	184	387
ENSMUSG00000015697	1318	1960	1981	2975	3309	3137
ENSMUSG00000015702	174	107	207	47	83	44
ENSMUSG00000015709	632	663	536	10275	10985	9309
ENSMUSG00000015711	89	641	388	811	711	552
ENSMUSG00000015714	3638	4734	4815	5507	5267	4652
ENSMUSG00000015721	0	0	0	0	0	0
ENSMUSG00000015733	2329	3369	3439	3635	3271	3699
ENSMUSG00000015745	1098	1126	1417	2454	2039	2273
ENSMUSG00000015747	296	349	459	602	523	703
ENSMUSG00000015748	1077	1268	1194	1801	1656	2079
ENSMUSG00000015749	4216	4477	5958	9306	8998	10303
ENSMUSG00000015750	625	1173	662	1135	1201	1038
ENSMUSG00000015755	2903	3130	3207	4838	4350	5468
ENSMUSG00000015757	1135	1546	1358	2073	1887	1608
ENSMUSG00000015759	539	916	748	619	540	805
ENSMUSG00000015766	2251	2434	2186	471	730	734
ENSMUSG00000015776	1531	1816	1799	2215	2336	2183
ENSMUSG00000015787	0	0	0	0	0	0
ENSMUSG00000015790	856	976	1121	1297	1175	1269
ENSMUSG00000015804	731	1128	880	846	860	1187
ENSMUSG00000015806	1157	1827	1831	1236	1701	1498
ENSMUSG00000015812	80	44	80	104	129	124
ENSMUSG00000015829	35	34	0	3	2	0
ENSMUSG00000015837	19235	17917	19017	41897	40892	46499
ENSMUSG00000015839	2390	2615	2868	4835	4856	4940
ENSMUSG00000015843	86	250	97	104	216	220
ENSMUSG00000015846	3778	5177	5690	4734	6392	6040
ENSMUSG00000015850	3894	5145	4824	13827	16431	13849
ENSMUSG00000015852	318	346	425	2	23	2
ENSMUSG00000015854	0	0	12	0	0	0
ENSMUSG00000015869	1070	1571	1259	3205	3199	3018
ENSMUSG00000015879	0	9	1	14	0	18
ENSMUSG00000015880	10	12	162	17	43	54
ENSMUSG00000015882	554	427	650	1062	584	785
ENSMUSG00000015889	1586	1818	1895	6081	5074	5059
ENSMUSG00000015890	1	4	2	268	270	177
ENSMUSG00000015932	3323	5315	5079	3107	4062	4180
ENSMUSG00000015937	1392	1653	2226	1589	2232	1703
ENSMUSG00000015942	123	559	233	531	664	730
ENSMUSG00000015943	274	66	156	136	153	227
ENSMUSG00000015944	601	709	678	975	1168	900
ENSMUSG00000015947	29	34	66	0	1	1
ENSMUSG00000015950	2	66	111	0	21	22
ENSMUSG00000015957	174	62	185	71	23	28
ENSMUSG00000015961	2129	2600	2996	2138	2062	2398
ENSMUSG00000015962	0	0	0	0	0	0
ENSMUSG00000015966	0	106	1	16	35	34
ENSMUSG00000015968	3	246	221	15	150	101
ENSMUSG00000015970	64	610	455	161	655	471
ENSMUSG00000015971	1120	660	1275	1036	1408	933
ENSMUSG00000015980	81	82	2	90	39	35
ENSMUSG00000015981	293	333	369	4	67	18
ENSMUSG00000015994	1333	1321	1261	1444	1832	1827
ENSMUSG00000016018	1130	1635	1542	2088	2094	2463
ENSMUSG00000016024	4564	6406	7350	170	414	456
ENSMUSG00000016028	3357	2684	3636	635	1526	1433
ENSMUSG00000016087	1854	3450	2781	133	229	241
ENSMUSG00000016128	3966	4537	3228	2550	3486	3230
ENSMUSG00000016150	1	19	1	0	28	0
ENSMUSG00000016179	0	36	0	1	2	7
ENSMUSG00000016181	632	945	697	1283	1131	1503
ENSMUSG00000016194	544	909	691	186	169	164
ENSMUSG00000016200	0	0	0	0	0	19
ENSMUSG00000016206	724	1028	567	77	89	173
ENSMUSG00000016239	226	168	97	229	315	255
ENSMUSG00000016252	699	1193	1433	1277	1318	1246
ENSMUSG00000016253	860	1334	1468	2321	2643	2293
ENSMUSG00000016255	0	0	0	0	0	0
ENSMUSG00000016256	4939	6602	6082	5814	6860	5869
ENSMUSG00000016257	454	575	871	790	812	1075
ENSMUSG00000016262	837	994	1154	250	550	438
ENSMUSG00000016283	21	13	114	33	110	20
ENSMUSG00000016308	361	369	823	761	634	892
ENSMUSG00000016319	1763	1969	2669	2575	2627	2713
ENSMUSG00000016327	0	0	0	0	0	0
ENSMUSG00000016344	823	903	961	686	1113	780
ENSMUSG00000016346	0	0	0	0	0	0
ENSMUSG00000016349	87	58	47	1158	1782	1144
ENSMUSG00000016356	406	427	363	511	727	645
ENSMUSG00000016382	3439	3585	3942	884	1273	1484
ENSMUSG00000016386	2	2	1	35	60	53
ENSMUSG00000016409	468	654	668	608	867	775
ENSMUSG00000016427	913	931	910	687	1089	869
ENSMUSG00000016458	0	0	0	0	0	0
ENSMUSG00000016477	181	173	269	111	216	203
ENSMUSG00000016481	2212	3313	2537	1261	1140	1207
ENSMUSG00000016487	8921	9915	12760	13332	13689	14345
ENSMUSG00000016493	68	291	70	169	188	269
ENSMUSG00000016494	23217	31137	25532	733	1879	2233
ENSMUSG00000016495	1504	1831	961	4414	4268	3928
ENSMUSG00000016496	673	1217	1045	4038	5025	3499
ENSMUSG00000016498	0	0	0	1	33	0
ENSMUSG00000016503	287	892	574	739	932	1063
ENSMUSG00000016510	249	324	434	381	323	308
ENSMUSG00000016520	738	925	904	554	528	971
ENSMUSG00000016524	0	0	0	0	0	0
ENSMUSG00000016526	24	8	51	141	182	123
ENSMUSG00000016528	3418	3941	4558	3532	4926	4472
ENSMUSG00000016529	0	0	0	0	0	0
ENSMUSG00000016534	7320	11181	10398	8464	8930	9988
ENSMUSG00000016541	1073	1598	1581	1395	2251	1825
ENSMUSG00000016552	480	287	533	195	422	297
ENSMUSG00000016554	1711	2105	3004	2041	2223	2562
ENSMUSG00000016559	24365	26509	30709	37406	36977	42232
ENSMUSG00000016619	1006	1135	1275	2289	2152	2866
ENSMUSG00000016624	62	79	50	637	605	544
ENSMUSG00000016626	0	0	0	0	0	0
ENSMUSG00000016637	593	393	567	370	326	514
ENSMUSG00000016664	3754	5339	5751	2291	4097	3188
ENSMUSG00000016756	1136	1474	1548	31	22	66
ENSMUSG00000016757	435	645	544	914	1210	925
ENSMUSG00000016758	135	324	346	42	121	9
ENSMUSG00000016763	315	231	721	125	273	318
ENSMUSG00000016831	1576	1662	2159	2638	2838	2679
ENSMUSG00000016833	0	2	85	54	19	26
ENSMUSG00000016918	5880	8602	6144	44	202	172
ENSMUSG00000016921	8862	10840	9319	13817	12939	15418
ENSMUSG00000016933	7207	10128	11752	5375	5624	5650
ENSMUSG00000016940	1197	1067	1280	1304	1445	1533
ENSMUSG00000016942	0	0	0	0	0	0
ENSMUSG00000016946	998	1135	820	984	948	1100
ENSMUSG00000016982	0	0	0	0	0	0
ENSMUSG00000016984	176	281	375	390	417	481
ENSMUSG00000016995	219	232	167	54	62	87
ENSMUSG00000016998	0	0	0	0	0	0
ENSMUSG00000017000	0	0	0	0	0	0
ENSMUSG00000017002	0	11	0	0	0	12
ENSMUSG00000017003	0	0	0	0	0	0
ENSMUSG00000017004	0	0	0	0	0	0
ENSMUSG00000017007	1	58	0	0	1	0
ENSMUSG00000017009	6435	7474	11586	5428	8131	10229
ENSMUSG00000017049	0	0	0	0	0	0
ENSMUSG00000017057	1228	1766	2104	299	425	680
ENSMUSG00000017064	0	0	0	0	0	0
ENSMUSG00000017119	3938	5851	4825	7747	6561	7036
ENSMUSG00000017132	1728	1575	1924	2449	2809	2477
ENSMUSG00000017144	4202	7573	5254	5442	5156	5965
ENSMUSG00000017146	5	34	106	163	125	134
ENSMUSG00000017165	30	24	1	0	0	0
ENSMUSG00000017167	979	1004	831	416	616	686
ENSMUSG00000017176	582	1034	809	1211	1281	1349
ENSMUSG00000017188	510	492	706	501	508	417
ENSMUSG00000017195	0	0	0	0	0	0
ENSMUSG00000017204	0	0	0	0	10	38
ENSMUSG00000017210	993	1315	1359	1707	2131	2162
ENSMUSG00000017211	0	0	0	0	0	0
ENSMUSG00000017221	3483	3842	4178	5030	4896	5280
ENSMUSG00000017264	1550	2206	2413	2768	2485	2443
ENSMUSG00000017286	816	1218	825	720	721	1012
ENSMUSG00000017288	630	1030	1226	1193	1509	1117
ENSMUSG00000017291	4080	6251	4876	8053	6838	8138
ENSMUSG00000017299	907	1248	858	1356	1643	1445
ENSMUSG00000017300	36	0	18	0	0	8
ENSMUSG00000017307	245	134	289	390	566	417
ENSMUSG00000017309	2772	6587	6347	73	396	548
ENSMUSG00000017310	0	0	0	0	0	0
ENSMUSG00000017311	0	0	0	0	7	0
ENSMUSG00000017314	141	447	479	738	410	456
ENSMUSG00000017316	0	13	1	0	0	0
ENSMUSG00000017344	1950	2740	1981	54	155	64
ENSMUSG00000017376	508	590	937	3892	3291	3817
ENSMUSG00000017386	1122	1247	1233	1474	1763	2227
ENSMUSG00000017390	2	126	73	115	239	154
ENSMUSG00000017400	98	90	75	69	48	160
ENSMUSG00000017404	321	469	350	605	440	720
ENSMUSG00000017405	1157	765	955	582	742	862
ENSMUSG00000017412	0	0	1	15	21	53
ENSMUSG00000017417	6186	8564	6679	73	276	262
ENSMUSG00000017418	1984	2377	2752	1886	1813	2335
ENSMUSG00000017421	3388	3890	3431	6158	5141	5861
ENSMUSG00000017428	1246	1472	1579	1999	1362	1871
ENSMUSG00000017446	1675	2798	2882	168	383	322
ENSMUSG00000017453	0	20	54	41	31	75
ENSMUSG00000017466	35421	48145	41148	17850	23655	19873
ENSMUSG00000017478	2670	2448	2353	4370	4258	5280
ENSMUSG00000017485	2967	5239	4044	4458	5360	5567
ENSMUSG00000017491	6	99	103	792	558	752
ENSMUSG00000017493	16736	19967	16787	634	1357	1164
ENSMUSG00000017499	75	159	67	50	148	102
ENSMUSG00000017548	1676	2527	2202	3554	2839	3795
ENSMUSG00000017550	38	123	156	380	142	426
ENSMUSG00000017561	648	1093	818	1011	930	1228
ENSMUSG00000017588	2	20	0	0	26	0
ENSMUSG00000017607	1230	1736	2440	612	1487	1897
ENSMUSG00000017615	2524	2985	2820	2212	3004	2784
ENSMUSG00000017631	2357	3551	4269	8628	9387	9319
ENSMUSG00000017639	297	701	859	415	616	888
ENSMUSG00000017652	147	32	257	1	68	54
ENSMUSG00000017664	534	737	862	866	1007	1096
ENSMUSG00000017667	205	335	179	624	551	709
ENSMUSG00000017670	1800	2316	2836	3328	3962	3965
ENSMUSG00000017677	10043	10512	10635	10917	10143	13103
ENSMUSG00000017679	834	1207	1416	713	959	720
ENSMUSG00000017686	1173	1698	1910	2043	2036	2297
ENSMUSG00000017688	0	0	0	0	0	0
ENSMUSG00000017692	823	683	715	722	929	1157
ENSMUSG00000017697	277	241	367	36	56	133
ENSMUSG00000017707	12885	21049	19547	8798	10750	10372
ENSMUSG00000017713	239	193	228	376	411	450
ENSMUSG00000017715	801	1041	1352	1548	1640	1889
ENSMUSG00000017716	30	38	78	57	67	206
ENSMUSG00000017718	5	96	0	77	76	106
ENSMUSG00000017720	0	0	0	0	0	0
ENSMUSG00000017721	1368	2010	1573	1838	2149	1803
ENSMUSG00000017723	66	35	37	1	15	0
ENSMUSG00000017724	2383	2353	2631	821	596	1138
ENSMUSG00000017733	0	0	0	0	0	0
ENSMUSG00000017734	161	232	248	330	438	633
ENSMUSG00000017737	54	136	140	38	4	0
ENSMUSG00000017740	36	6	58	130	163	140
ENSMUSG00000017747	667	901	753	710	710	693
ENSMUSG00000017754	4285	7452	7598	2904	3012	2784
ENSMUSG00000017756	2985	3525	3625	1685	2694	2210
ENSMUSG00000017760	2924	2980	3636	4642	6603	5342
ENSMUSG00000017764	132	194	332	247	334	324
ENSMUSG00000017765	4140	5139	4884	2822	3422	4044
ENSMUSG00000017767	0	1	25	17	0	24
ENSMUSG00000017774	11454	13708	14892	6916	8511	8670
ENSMUSG00000017776	5793	6264	5752	5716	6206	6577
ENSMUSG00000017778	161	341	262	340	333	344
ENSMUSG00000017781	2746	3075	3860	3149	3819	3604
ENSMUSG00000017801	507	877	596	851	829	882
ENSMUSG00000017802	2210	2686	2321	5825	5337	5716
ENSMUSG00000017817	2	195	125	70	107	55
ENSMUSG00000017830	480	372	415	54	111	151
ENSMUSG00000017831	2318	2095	2530	2086	1770	2240
ENSMUSG00000017832	0	0	0	0	0	0
ENSMUSG00000017837	617	1295	894	893	957	856
ENSMUSG00000017843	2888	3835	3758	2340	3009	2498
ENSMUSG00000017858	648	791	843	1022	1186	1331
ENSMUSG00000017861	3	18	108	47	177	11
ENSMUSG00000017868	1	27	0	29	4	18
ENSMUSG00000017897	183	258	297	67	32	87
ENSMUSG00000017922	0	0	0	0	0	0
ENSMUSG00000017929	1226	1256	1341	6381	5254	5920
ENSMUSG00000017943	0	0	0	39	0	23
ENSMUSG00000017950	0	0	0	0	0	0
ENSMUSG00000017969	0	5	0	0	0	0
ENSMUSG00000017978	119	367	121	0	44	91
ENSMUSG00000017999	1641	1710	2091	2769	3067	2923
ENSMUSG00000018001	4701	6996	4879	10052	10288	10204
ENSMUSG00000018008	252	296	373	22	32	22
ENSMUSG00000018012	533	551	417	117	156	533
ENSMUSG00000018040	527	844	966	1154	852	1025
ENSMUSG00000018042	8765	11605	12558	5677	8262	7663
ENSMUSG00000018068	592	812	908	1301	1133	1597
ENSMUSG00000018076	5592	7031	6222	7016	7530	8600
ENSMUSG00000018102	478	151	342	160	183	93
ENSMUSG00000018126	0	1	25	0	0	0
ENSMUSG00000018143	7510	6106	9036	12377	12262	13976
ENSMUSG00000018160	2467	3100	2495	4133	4033	4947
ENSMUSG00000018166	2176	1937	2881	16400	17864	17067
ENSMUSG00000018167	918	745	928	1425	2220	1526
ENSMUSG00000018168	0	0	0	1	15	0
ENSMUSG00000018169	707	824	997	30	105	30
ENSMUSG00000018171	1835	2047	2264	12670	8062	12401
ENSMUSG00000018189	380	470	541	645	863	831
ENSMUSG00000018196	657	1091	833	805	784	748
ENSMUSG00000018199	1114	1512	1583	1789	1585	1593
ENSMUSG00000018209	1426	1291	1389	2865	2946	3152
ENSMUSG00000018211	0	0	0	0	0	0
ENSMUSG00000018217	4031	3884	3823	2514	3955	3671
ENSMUSG00000018238	43	84	102	66	0	24
ENSMUSG00000018239	203	191	35	270	215	236
ENSMUSG00000018259	0	0	0	0	0	0
ENSMUSG00000018263	31	22	25	6	0	0
ENSMUSG00000018286	1396	1710	2006	3113	3531	3423
ENSMUSG00000018287	577	739	1026	1265	1176	1151
ENSMUSG00000018293	6540	6914	7922	8516	9238	9805
ENSMUSG00000018322	1072	1915	1719	1910	2338	2394
ENSMUSG00000018326	4198	5885	5555	5520	5425	5047
ENSMUSG00000018334	1636	2291	1913	1200	1412	1350
ENSMUSG00000018339	129	366	339	2510	2686	2792
ENSMUSG00000018340	3251	4710	4336	6151	6574	6333
ENSMUSG00000018341	0	91	70	4	81	55
ENSMUSG00000018347	103	385	357	402	616	449
ENSMUSG00000018362	211	209	251	259	386	328
ENSMUSG00000018363	1877	2571	2495	3495	2926	3555
ENSMUSG00000018372	701	815	820	1732	1603	1870
ENSMUSG00000018377	0	0	0	0	0	0
ENSMUSG00000018378	0	0	0	0	0	0
ENSMUSG00000018379	0	0	0	0	0	0
ENSMUSG00000018381	932	1033	1050	64	191	120
ENSMUSG00000018387	68	201	66	420	373	414
ENSMUSG00000018395	703	938	1075	2463	2392	2183
ENSMUSG00000018398	3039	4347	3520	9881	10587	10268
ENSMUSG00000018401	989	1194	1035	2092	2196	2278
ENSMUSG00000018405	353	390	169	411	589	455
ENSMUSG00000018411	585	502	922	3194	3218	3349
ENSMUSG00000018412	2370	3802	3583	5310	4930	5358
ENSMUSG00000018415	1516	2267	2508	1026	2037	1816
ENSMUSG00000018417	4737	5116	4507	5522	6034	6479
ENSMUSG00000018425	741	1151	991	1586	1010	1454
ENSMUSG00000018427	1548	2342	2219	1942	1532	2458
ENSMUSG00000018428	1388	1681	1917	2569	2955	3206
ENSMUSG00000018433	377	655	623	667	569	950
ENSMUSG00000018442	810	1171	1230	1204	1294	1509
ENSMUSG00000018446	447	1274	1078	1204	1426	1131
ENSMUSG00000018449	638	952	944	1780	1578	1771
ENSMUSG00000018451	1	46	0	0	0	32
ENSMUSG00000018459	0	33	52	0	0	0
ENSMUSG00000018470	36	0	51	0	12	149
ENSMUSG00000018474	6053	6407	6256	8866	9591	9967
ENSMUSG00000018476	20759	13792	11760	12083	12282	14166
ENSMUSG00000018479	0	0	0	0	0	0
ENSMUSG00000018481	1184	1632	1668	4269	3410	4353
ENSMUSG00000018486	77	33	102	0	1	2
ENSMUSG00000018500	166	230	117	42	99	55
ENSMUSG00000018501	5969	7673	7263	10030	9179	10191
ENSMUSG00000018507	167	304	346	1923	2328	2107
ENSMUSG00000018509	161	229	100	566	592	826
ENSMUSG00000018537	1065	1327	1584	2839	2441	2702
ENSMUSG00000018541	460	817	851	1042	1425	1300
ENSMUSG00000018543	1	105	60	78	17	109
ENSMUSG00000018547	2159	2969	3536	2533	2205	2662
ENSMUSG00000018548	906	1084	1225	1861	1928	2269
ENSMUSG00000018554	0	24	60	14	0	0
ENSMUSG00000018559	1824	2138	2709	2165	2538	2664
ENSMUSG00000018565	432	792	1097	698	1100	693
ENSMUSG00000018566	87	56	161	47	94	69
ENSMUSG00000018567	4947	5491	5099	6849	7540	7470
ENSMUSG00000018569	20	0	0	0	0	0
ENSMUSG00000018570	33	37	126	141	209	133
ENSMUSG00000018572	4991	4018	4373	4920	5520	6104
ENSMUSG00000018574	3173	3188	3363	4878	5035	5642
ENSMUSG00000018581	0	0	35	1	63	19
ENSMUSG00000018583	2243	2747	2882	2784	3040	3175
ENSMUSG00000018585	1407	1466	1696	788	1364	1152
ENSMUSG00000018589	0	0	0	0	0	0
ENSMUSG00000018593	64268	81377	66081	4386	11827	10098
ENSMUSG00000018595	0	0	3	14	0	0
ENSMUSG00000018599	238	271	227	501	255	435
ENSMUSG00000018604	1225	1849	1412	918	1436	1315
ENSMUSG00000018620	0	0	0	0	0	0
ENSMUSG00000018623	0	0	0	0	0	0
ENSMUSG00000018634	0	0	0	0	0	0
ENSMUSG00000018648	108	95	247	13	47	3
ENSMUSG00000018651	440	654	441	345	627	651
ENSMUSG00000018654	58	47	81	0	0	1
ENSMUSG00000018656	0	0	0	0	0	0
ENSMUSG00000018659	233	350	598	152	380	336
ENSMUSG00000018661	1125	1359	1312	1575	1661	1262
ENSMUSG00000018666	1929	3939	3392	3586	3709	3758
ENSMUSG00000018669	1256	1499	1950	1527	1444	1806
ENSMUSG00000018672	1207	1589	1418	616	473	551
ENSMUSG00000018677	1004	1151	1844	1158	1573	1351
ENSMUSG00000018678	481	944	955	1124	1450	951
ENSMUSG00000018697	507	647	726	1519	1464	1304
ENSMUSG00000018698	0	0	0	0	0	0
ENSMUSG00000018707	12825	16285	15679	24150	22631	22730
ENSMUSG00000018727	50	1	0	14	0	26
ENSMUSG00000018733	106	148	133	291	207	193
ENSMUSG00000018736	3105	3499	3400	3156	3764	3724
ENSMUSG00000018740	664	399	485	1512	1594	1711
ENSMUSG00000018750	4767	6585	6202	3509	4341	3702
ENSMUSG00000018752	31	37	76	18	11	0
ENSMUSG00000018761	1063	1241	1545	1414	1613	1521
ENSMUSG00000018765	4055	3687	5188	7226	7330	7094
ENSMUSG00000018770	2143	2256	2467	4039	4289	4892
ENSMUSG00000018774	1215	2053	1837	1998	1983	2596
ENSMUSG00000018776	0	0	0	0	0	0
ENSMUSG00000018796	449	971	1234	898	1088	1495
ENSMUSG00000018800	696	850	875	1921	1621	1875
[truncated: 45,070 more rows]

## Sheet: all count no zero
ID	CD34plus_1	CD34plus_2	CD34plus_3	CD34minus_1	CD34minus_2	CD34minus_3
ENSMUSG00000000001	4081	4647	4481	4596	3846	4438
ENSMUSG00000000028	26	5	3	210	180	115
ENSMUSG00000000031	154	240	130	3	9	91
ENSMUSG00000000037	172	232	232	81	116	86
ENSMUSG00000000049	28	0	26	0	0	0
ENSMUSG00000000056	776	748	590	992	823	1051
ENSMUSG00000000058	2356	3769	3851	1402	1906	2455
ENSMUSG00000000078	17393	16710	20188	27370	25065	28455
ENSMUSG00000000085	1498	2100	2202	1112	1683	1636
ENSMUSG00000000088	284	693	472	870	775	735
ENSMUSG00000000093	353	333	898	3445	3918	3765
ENSMUSG00000000094	2	39	9	319	461	334
ENSMUSG00000000120	4727	5506	3616	221	576	496
ENSMUSG00000000125	3	123	243	16	206	302
ENSMUSG00000000126	470	540	500	90	54	196
ENSMUSG00000000127	810	1078	1098	645	1025	834
ENSMUSG00000000131	2014	2723	2401	5767	4710	5061
ENSMUSG00000000134	1356	1975	2221	1615	1791	2109
ENSMUSG00000000142	2558	2004	2725	6140	6287	7024
ENSMUSG00000000148	764	1184	698	1308	1043	972
ENSMUSG00000000149	1637	2672	2187	1633	2111	1958
ENSMUSG00000000154	31	143	142	25	37	127
ENSMUSG00000000157	0	7	0	0	1	0
ENSMUSG00000000167	14	1	1	34	15	36
ENSMUSG00000000168	832	1667	1885	2367	2064	2395
ENSMUSG00000000171	670	1454	1282	1448	1450	1094
ENSMUSG00000000182	61	0	0	0	0	0
ENSMUSG00000000184	5319	5881	5829	2681	3300	3767
ENSMUSG00000000194	1779	2587	2530	1973	2308	2349
ENSMUSG00000000197	223	276	82	133	180	193
ENSMUSG00000000202	0	0	43	0	0	0
ENSMUSG00000000204	4017	4318	2766	24	113	198
ENSMUSG00000000216	89	78	399	11	101	119
ENSMUSG00000000223	459	839	677	104	364	258
ENSMUSG00000000244	51	4	184	20	27	17
ENSMUSG00000000247	1348	1676	3177	505	1361	1804
ENSMUSG00000000253	301	179	86	2	13	85
ENSMUSG00000000266	1102	1546	1719	2953	2439	3662
ENSMUSG00000000275	2892	3169	2890	1655	2015	2012
ENSMUSG00000000276	662	742	647	858	759	892
ENSMUSG00000000278	3275	4193	4006	5862	6634	5730
ENSMUSG00000000282	1274	1769	1839	3860	3626	3774
ENSMUSG00000000290	102	335	447	15	34	46
ENSMUSG00000000295	175	40	163	108	156	200
ENSMUSG00000000296	0	26	29	173	156	161
ENSMUSG00000000301	0	39	55	65	40	62
ENSMUSG00000000303	1910	2844	5077	16102	17374	16416
ENSMUSG00000000305	549	258	235	206	477	391
ENSMUSG00000000308	717	1196	1804	589	1235	1201
ENSMUSG00000000317	615	971	972	47	179	205
ENSMUSG00000000318	87	149	145	1	1	0
ENSMUSG00000000320	63	76	65	0	18	22
ENSMUSG00000000325	75	0	2	45	53	18
ENSMUSG00000000339	897	697	842	1218	872	905
ENSMUSG00000000340	402	740	631	772	642	889
ENSMUSG00000000346	3546	4692	5913	5840	6709	7202
ENSMUSG00000000355	258	574	472	728	549	936
ENSMUSG00000000359	478	544	299	4	46	77
ENSMUSG00000000365	0	0	0	3	1	1
ENSMUSG00000000374	1638	2483	2468	3611	3713	4421
ENSMUSG00000000378	792	1139	1132	969	1291	927
ENSMUSG00000000384	849	802	795	1195	1475	1403
ENSMUSG00000000385	1	18	1	7	41	30
ENSMUSG00000000386	43	86	79	1074	853	927
ENSMUSG00000000392	1608	2119	1480	23	71	65
ENSMUSG00000000394	142	62	240	1	2	2
ENSMUSG00000000399	1164	1384	1685	2169	2665	2127
ENSMUSG00000000402	81	254	383	55	75	95
ENSMUSG00000000409	149	179	67	234	99	202
ENSMUSG00000000416	2846	3203	2364	5345	5451	4311
ENSMUSG00000000420	2083	2653	2928	1912	2325	2322
ENSMUSG00000000439	890	744	1216	1253	1350	1595
ENSMUSG00000000440	363	415	492	162	316	179
ENSMUSG00000000441	2904	3926	4191	4782	5183	4522
ENSMUSG00000000486	507	602	793	378	478	343
ENSMUSG00000000489	910	1828	2519	171	251	570
ENSMUSG00000000530	2634	4024	3463	680	1278	1172
ENSMUSG00000000531	2567	2796	2845	1573	2290	2409
ENSMUSG00000000532	1641	2394	2374	2178	2165	2464
ENSMUSG00000000538	3547	4766	3883	4932	5339	4500
ENSMUSG00000000544	0	58	0	0	0	2
ENSMUSG00000000552	995	1111	1432	1061	1431	1250
ENSMUSG00000000555	5056	5011	4174	1937	2263	2274
ENSMUSG00000000561	165	562	353	887	839	1010
ENSMUSG00000000563	976	1305	1086	1528	1558	1402
ENSMUSG00000000567	4339	4948	4422	1197	1493	1816
ENSMUSG00000000568	3901	6214	6265	8619	8403	9309
ENSMUSG00000000579	0	94	67	91	105	37
ENSMUSG00000000581	224	740	890	409	642	430
ENSMUSG00000000594	1117	1999	2192	1739	2215	1935
ENSMUSG00000000600	1357	1656	1156	2196	2041	2072
ENSMUSG00000000605	2393	3133	3237	1946	1939	2715
ENSMUSG00000000627	67	321	134	60	88	80
ENSMUSG00000000628	4151	2915	2979	949	1008	1325
ENSMUSG00000000631	3123	4052	4418	2341	2825	2963
ENSMUSG00000000673	0	27	0	0	0	0
ENSMUSG00000000682	1	27	235	1	42	35
ENSMUSG00000000686	2	39	0	54	46	41
ENSMUSG00000000690	754	1399	1210	98	123	393
ENSMUSG00000000693	568	992	634	681	880	830
ENSMUSG00000000708	1979	2787	1946	2469	2395	2356
ENSMUSG00000000711	2829	3267	3672	5223	6483	5393
ENSMUSG00000000730	0	18	1	0	0	0
ENSMUSG00000000732	1300	1318	1043	225	460	48
ENSMUSG00000000738	1797	1604	1818	2346	2329	2155
ENSMUSG00000000739	1256	1421	1208	721	939	1380
ENSMUSG00000000740	960	1312	1539	1309	1334	1508
ENSMUSG00000000743	1451	1913	1895	2742	2582	2346
ENSMUSG00000000751	1107	1696	2207	2289	2841	2597
ENSMUSG00000000753	6395	9498	6966	144	396	177
ENSMUSG00000000759	1422	1713	1667	3479	3406	3189
ENSMUSG00000000776	800	1090	701	859	1215	1128
ENSMUSG00000000782	522	388	611	1278	1167	1394
ENSMUSG00000000787	35164	49989	45159	36151	40040	45316
ENSMUSG00000000791	26	0	0	29	24	0
ENSMUSG00000000792	142	31	28	13	31	42
ENSMUSG00000000794	174	325	606	149	94	76
ENSMUSG00000000804	1643	1610	1983	4397	4167	4403
ENSMUSG00000000805	74	61	84	22	49	0
ENSMUSG00000000811	580	906	870	702	697	696
ENSMUSG00000000823	1757	2600	2837	2253	2649	2423
ENSMUSG00000000826	3629	3946	3898	5265	5800	5879
ENSMUSG00000000827	2131	3016	2499	2027	2225	2457
ENSMUSG00000000838	2277	2431	2264	3558	3111	2980
ENSMUSG00000000861	265	341	653	1373	1750	1707
ENSMUSG00000000869	0	0	0	19	0	0
ENSMUSG00000000876	375	949	693	380	587	489
ENSMUSG00000000881	776	1120	369	241	539	395
ENSMUSG00000000884	98	359	568	358	280	298
ENSMUSG00000000889	1	0	0	2	37	0
ENSMUSG00000000901	556	907	251	411	269	284
ENSMUSG00000000902	897	1271	1459	2190	2187	2084
ENSMUSG00000000915	1726	1578	2271	597	1314	1055
ENSMUSG00000000916	487	766	644	1305	1369	1009
ENSMUSG00000000934	247	402	344	661	608	525
ENSMUSG00000000938	75	89	1	1	38	42
ENSMUSG00000000942	1	17	0	1	15	12
ENSMUSG00000000948	34	66	36	0	27	63
ENSMUSG00000000957	11848	15656	11557	9224	11935	10502
ENSMUSG00000000958	229	785	946	244	360	232
ENSMUSG00000000959	697	1163	1216	1187	1393	1318
ENSMUSG00000000976	732	893	552	1092	1178	1110
ENSMUSG00000000982	0	19	7	0	0	0
ENSMUSG00000001014	1	76	121	0	0	21
ENSMUSG00000001016	1668	2151	2354	3723	3474	4572
ENSMUSG00000001017	5491	5535	6044	8499	10827	10005
ENSMUSG00000001018	1414	1443	1676	1865	2044	1653
ENSMUSG00000001020	70	35	59	15	2	11
ENSMUSG00000001021	0	26	1	56	0	17
ENSMUSG00000001025	8234	7377	9538	1360	2221	2234
ENSMUSG00000001027	0	29	0	0	2	0
ENSMUSG00000001029	589	964	873	140	111	121
ENSMUSG00000001034	1193	1388	1385	1525	1404	1810
ENSMUSG00000001036	2394	3632	3373	3400	4143	4369
ENSMUSG00000001039	125	111	149	52	232	168
ENSMUSG00000001052	2357	3212	2556	2977	3602	3408
ENSMUSG00000001053	825	1433	2092	605	638	734
ENSMUSG00000001054	1131	1093	1249	975	1118	1094
ENSMUSG00000001056	529	761	1509	781	1048	1028
ENSMUSG00000001062	1346	1057	1653	1559	1151	1732
ENSMUSG00000001065	1733	1413	1370	3045	2647	2914
ENSMUSG00000001082	1910	1452	1486	1336	1856	1779
ENSMUSG00000001089	3399	3741	3990	3179	3186	3271
ENSMUSG00000001098	5448	8335	7228	4495	5144	5443
ENSMUSG00000001100	1158	1060	1106	1411	1800	1905
ENSMUSG00000001103	27	152	1	0	1	1
ENSMUSG00000001105	1203	1400	1907	1584	1577	1795
ENSMUSG00000001119	37161	44555	31952	1101	3363	3238
ENSMUSG00000001120	453	430	435	457	603	585
ENSMUSG00000001123	1682	2045	2533	377	507	387
ENSMUSG00000001127	3080	4706	3800	5021	5365	6135
ENSMUSG00000001128	453	471	915	456	445	686
ENSMUSG00000001131	320	454	259	61	118	136
ENSMUSG00000001134	1	33	4	66	92	128
ENSMUSG00000001138	1106	1264	1467	2445	2288	2225
ENSMUSG00000001143	717	594	765	1546	1788	1466
ENSMUSG00000001150	1586	1874	1324	2792	2743	2413
ENSMUSG00000001151	2022	2582	2881	3085	3401	3073
ENSMUSG00000001155	0	0	1	25	0	0
ENSMUSG00000001156	1466	1764	1524	2453	2293	2855
ENSMUSG00000001157	477	826	949	610	902	580
ENSMUSG00000001158	454	871	647	761	1035	840
ENSMUSG00000001166	75	176	126	101	153	35
ENSMUSG00000001173	868	1485	1737	1687	1842	1721
ENSMUSG00000001175	11194	14301	19525	8631	10164	12292
ENSMUSG00000001211	2366	3350	3065	3863	4435	4830
ENSMUSG00000001227	3225	3496	3592	142	386	320
ENSMUSG00000001228	270	245	275	376	335	534
ENSMUSG00000001229	1685	1693	1825	1987	1756	1718
ENSMUSG00000001240	2698	4420	4859	242	740	527
ENSMUSG00000001247	316	372	532	147	272	306
ENSMUSG00000001248	6550	6673	6621	6599	6459	7771
ENSMUSG00000001249	208	141	188	29	1	26
ENSMUSG00000001270	1377	981	1133	1205	1291	1124
ENSMUSG00000001280	3230	4610	5721	6363	6619	7364
ENSMUSG00000001281	94	111	130	60	34	4
ENSMUSG00000001285	328	437	460	736	694	1084
ENSMUSG00000001288	3204	4571	5383	4248	5539	5487
ENSMUSG00000001289	737	668	1327	914	1128	1225
ENSMUSG00000001300	5506	6722	7510	1666	2610	2960
ENSMUSG00000001305	499	397	480	358	605	633
ENSMUSG00000001313	524	487	579	1351	884	1295
ENSMUSG00000001323	541	735	771	523	628	731
ENSMUSG00000001333	44	13	53	15	161	48
ENSMUSG00000001334	1	18	58	0	0	0
ENSMUSG00000001348	147	221	209	146	338	147
ENSMUSG00000001349	96	36	190	13	120	83
ENSMUSG00000001366	564	1173	1201	1486	1461	1549
ENSMUSG00000001376	683	979	692	652	696	1062
ENSMUSG00000001380	925	1731	1718	2390	2098	1852
ENSMUSG00000001383	1969	2238	2420	3175	3240	2928
ENSMUSG00000001403	62	79	3	37	127	111
ENSMUSG00000001415	2854	3027	3031	6698	6504	6206
ENSMUSG00000001416	2633	2326	3518	3985	3879	4397
ENSMUSG00000001418	1639	2688	2486	4129	3814	3746
ENSMUSG00000001419	3328	4610	4536	8824	8508	9428
ENSMUSG00000001420	27	181	128	193	257	294
ENSMUSG00000001424	2932	3103	3606	3524	4206	3860
ENSMUSG00000001435	17523	22466	19381	1578	2797	3483
ENSMUSG00000001436	305	361	458	283	375	258
ENSMUSG00000001440	6957	8322	8867	9737	9161	10169
ENSMUSG00000001441	1883	2903	4210	4276	4195	4895
ENSMUSG00000001444	0	12	0	0	0	0
ENSMUSG00000001445	771	1071	951	891	1054	817
ENSMUSG00000001467	1120	1170	1460	2541	2242	2826
ENSMUSG00000001472	6842	9665	8770	22076	22196	23419
ENSMUSG00000001473	2242	2201	1846	833	971	1092
ENSMUSG00000001482	1127	1321	1082	1568	1675	1724
ENSMUSG00000001493	3273	4540	4364	46	189	76
ENSMUSG00000001504	1767	1801	2916	722	1250	2307
ENSMUSG00000001506	191635	232849	165966	3657	26055	17163
ENSMUSG00000001507	1928	3304	4045	941	1658	1759
ENSMUSG00000001508	0	0	13	0	0	0
ENSMUSG00000001510	21	91	88	70	67	84
ENSMUSG00000001517	456	290	184	422	301	460
ENSMUSG00000001518	690	956	1210	1039	1037	929
ENSMUSG00000001520	2	76	35	0	35	37
ENSMUSG00000001521	1503	1709	1639	3396	3173	3262
ENSMUSG00000001524	120	347	287	444	423	516
ENSMUSG00000001525	7969	8874	9564	6599	7747	8059
ENSMUSG00000001542	248	481	584	144	404	288
ENSMUSG00000001552	4046	4370	7102	2515	4376	4551
ENSMUSG00000001555	3032	3536	3505	267	354	485
ENSMUSG00000001558	27	12	0	2	11	19
ENSMUSG00000001566	0	0	0	0	24	0
ENSMUSG00000001569	833	1300	916	1720	1653	1869
ENSMUSG00000001576	1839	2829	1928	1552	1507	1650
ENSMUSG00000001583	415	237	713	457	327	494
ENSMUSG00000001588	4	87	140	689	689	828
ENSMUSG00000001604	225	155	214	38	1	56
ENSMUSG00000001627	9949	8452	10978	6671	6198	9345
ENSMUSG00000001630	293	534	269	1219	750	628
ENSMUSG00000001632	2237	2324	3036	3842	4026	4076
ENSMUSG00000001642	230	225	371	313	438	519
ENSMUSG00000001655	7	47	231	105	73	286
ENSMUSG00000001656	35	13	21	0	1	0
ENSMUSG00000001657	428	524	653	125	236	242
ENSMUSG00000001661	546	427	489	57	170	147
ENSMUSG00000001663	490	1071	570	269	212	183
ENSMUSG00000001665	231	265	414	63	131	94
ENSMUSG00000001666	61	79	221	93	94	99
ENSMUSG00000001672	22	86	89	37	74	93
ENSMUSG00000001674	190	379	211	185	195	429
ENSMUSG00000001687	2226	1990	3591	10372	9624	10311
ENSMUSG00000001700	441	467	606	328	337	265
ENSMUSG00000001707	291	235	472	319	378	485
ENSMUSG00000001729	7059	7354	8068	10753	11895	11211
ENSMUSG00000001739	147	141	96	0	134	29
ENSMUSG00000001741	1195	2229	1137	1287	1346	877
ENSMUSG00000001750	2773	4488	4230	3957	3265	3790
ENSMUSG00000001751	648	1205	761	956	1273	1068
ENSMUSG00000001755	991	795	759	796	1056	1015
ENSMUSG00000001761	3087	3635	4091	2192	2782	2110
ENSMUSG00000001763	0	0	0	1	54	8
ENSMUSG00000001767	554	943	843	1091	877	864
ENSMUSG00000001768	2541	3228	3290	2466	2542	2778
ENSMUSG00000001774	722	879	1142	1346	899	1076
ENSMUSG00000001783	3114	4287	4389	3726	4216	3896
ENSMUSG00000001785	432	561	302	525	669	719
ENSMUSG00000001786	660	1365	1046	2340	2482	2039
ENSMUSG00000001794	6032	7204	8289	5546	6433	7212
ENSMUSG00000001802	1042	813	310	156	284	182
ENSMUSG00000001819	0	23	0	0	0	0
ENSMUSG00000001829	558	791	591	877	1002	877
ENSMUSG00000001833	3477	6375	5208	4468	3906	5253
ENSMUSG00000001844	813	1216	983	1338	1345	1242
ENSMUSG00000001847	4910	7297	7135	6671	7227	6621
ENSMUSG00000001855	1337	1742	1241	3561	3075	2838
ENSMUSG00000001864	50	34	212	170	274	183
ENSMUSG00000001865	1	36	1	0	7	0
ENSMUSG00000001870	6666	8776	6142	400	881	706
ENSMUSG00000001891	1279	1803	1713	2344	2457	2708
ENSMUSG00000001901	0	0	68	1	0	17
ENSMUSG00000001909	1506	1982	1944	2879	3021	3300
ENSMUSG00000001910	1213	2084	1714	2337	2352	2300
ENSMUSG00000001911	11315	15515	14142	4303	7949	7746
ENSMUSG00000001918	4499	6203	4558	2456	2021	2846
ENSMUSG00000001924	6710	8000	7156	7411	8919	8155
ENSMUSG00000001930	26374	35771	35792	573	2818	2323
ENSMUSG00000001942	546	875	878	438	457	600
ENSMUSG00000001943	243	546	237	25	30	72
ENSMUSG00000001946	5052	8037	6821	288	953	938
ENSMUSG00000001948	61	90	135	48	105	117
ENSMUSG00000001962	1131	1408	1239	2329	2100	2768
ENSMUSG00000001964	1380	1532	1950	1774	2233	2341
ENSMUSG00000001983	137	69	68	209	251	160
ENSMUSG00000001985	155	322	149	225	276	247
ENSMUSG00000001986	868	1165	861	49	37	22
ENSMUSG00000001988	0	16	0	0	1	0
ENSMUSG00000001995	1581	1715	2065	4365	5793	4589
ENSMUSG00000001998	385	1133	970	1613	1560	1409
ENSMUSG00000001999	471	357	392	394	340	528
ENSMUSG00000002006	556	501	578	136	338	216
ENSMUSG00000002007	112	117	1	3	58	34
ENSMUSG00000002010	1597	2134	2150	1976	2370	2734
ENSMUSG00000002012	212	103	56	174	113	79
ENSMUSG00000002014	1156	1386	1571	1409	1490	1566
ENSMUSG00000002015	2918	3291	4276	3512	3802	4366
ENSMUSG00000002017	593	1125	905	1022	1090	1152
ENSMUSG00000002020	5252	4532	4689	576	889	1190
ENSMUSG00000002028	4351	6378	5132	11448	9000	10014
ENSMUSG00000002031	974	969	823	1551	1447	1585
ENSMUSG00000002032	0	55	36	63	64	93
ENSMUSG00000002033	0	0	0	22	0	0
ENSMUSG00000002043	270	399	372	507	616	543
ENSMUSG00000002052	4263	5662	5540	8146	8857	9495
ENSMUSG00000002055	118	68	3	11	115	81
ENSMUSG00000002057	0	0	0	0	0	42
ENSMUSG00000002058	252	135	254	105	98	152
ENSMUSG00000002059	2456	2826	2195	2811	2316	2465
ENSMUSG00000002064	766	1197	1131	1363	1682	2042
ENSMUSG00000002068	330	398	166	226	223	310
ENSMUSG00000002076	0	2	0	0	0	0
ENSMUSG00000002083	1097	788	1468	1759	1450	1916
ENSMUSG00000002100	0	28	0	8	0	0
ENSMUSG00000002102	3254	3300	4550	4593	5273	5783
ENSMUSG00000002103	1170	1857	1346	960	1414	1009
ENSMUSG00000002104	2	1	2	42	174	183
ENSMUSG00000002105	1531	1742	2212	1052	1482	1601
ENSMUSG00000002107	1200	2275	2129	5364	5314	4687
ENSMUSG00000002108	1437	1858	1455	72	193	141
ENSMUSG00000002109	666	678	541	1183	1485	1421
ENSMUSG00000002111	51	87	277	1	28	0
ENSMUSG00000002129	2141	2708	2735	3300	3694	4123
ENSMUSG00000002147	4663	6103	5497	6283	6852	6211
ENSMUSG00000002204	0	129	73	27	43	0
ENSMUSG00000002205	496	664	736	727	554	1045
ENSMUSG00000002210	480	692	735	919	900	864
ENSMUSG00000002221	1174	1387	1846	2510	2589	2478
ENSMUSG00000002222	3610	4011	3393	5823	5465	6814
ENSMUSG00000002227	520	465	525	1018	1181	1026
ENSMUSG00000002228	84	95	85	86	67	164
ENSMUSG00000002233	3369	3569	3477	4092	3482	4360
ENSMUSG00000002249	1111	1099	998	1947	1910	2006
ENSMUSG00000002250	1311	1738	2120	1931	2118	2093
ENSMUSG00000002257	855	902	1048	203	272	390
ENSMUSG00000002265	3489	3843	2857	4270	3008	3080
ENSMUSG00000002266	0	35	61	26	27	34
ENSMUSG00000002274	155	179	109	429	387	443
ENSMUSG00000002279	439	677	668	595	661	570
ENSMUSG00000002280	385	472	370	723	784	619
ENSMUSG00000002289	2922	3704	2499	3148	3507	3346
ENSMUSG00000002297	70	128	96	273	212	179
ENSMUSG00000002307	1428	1327	1954	1904	1935	2319
ENSMUSG00000002308	126	184	159	248	192	291
ENSMUSG00000002319	1422	2412	2167	2869	2299	2683
ENSMUSG00000002320	1701	2086	2272	1954	2979	2318
ENSMUSG00000002324	13	60	29	31	3	98
ENSMUSG00000002325	1969	2591	2065	3389	3723	3178
ENSMUSG00000002326	415	789	536	418	692	603
ENSMUSG00000002329	590	832	1017	1063	1143	793
ENSMUSG00000002332	673	1069	915	692	1222	764
ENSMUSG00000002341	1	2	0	67	85	0
ENSMUSG00000002342	863	1332	1176	1405	2142	1424
ENSMUSG00000002343	99	275	133	543	403	325
ENSMUSG00000002345	317	616	695	649	724	842
ENSMUSG00000002346	330	542	225	1055	860	753
ENSMUSG00000002365	1607	2543	2754	5480	5100	6012
ENSMUSG00000002372	1515	1926	1642	2736	2949	2516
ENSMUSG00000002379	553	300	745	509	998	593
ENSMUSG00000002384	0	9	36	19	0	0
ENSMUSG00000002393	1144	1098	1678	1593	2062	1708
ENSMUSG00000002395	3254	2610	4033	3053	4134	3689
ENSMUSG00000002396	408	413	411	532	757	497
ENSMUSG00000002409	537	513	505	768	976	1066
ENSMUSG00000002413	1437	2257	1961	2209	1594	2345
ENSMUSG00000002416	164	332	171	369	304	344
ENSMUSG00000002428	591	979	1039	963	790	936
ENSMUSG00000002455	2066	2569	2687	3369	3161	3741
ENSMUSG00000002458	387	209	185	53	265	200
ENSMUSG00000002459	0	19	51	0	0	0
ENSMUSG00000002475	77	100	64	51	116	41
ENSMUSG00000002477	220	93	254	262	175	152
ENSMUSG00000002486	789	593	708	1404	1439	1340
ENSMUSG00000002489	1536	1931	1994	607	1527	1503
ENSMUSG00000002496	3440	4069	3731	4907	5354	4706
ENSMUSG00000002500	0	1	1	6	30	9
ENSMUSG00000002504	2573	4100	3608	203	848	828
ENSMUSG00000002524	3044	3678	4589	6177	7070	6255
ENSMUSG00000002546	4055	5379	3856	4438	4819	4762
ENSMUSG00000002550	536	661	591	1243	1589	1200
ENSMUSG00000002565	215	431	400	172	341	505
ENSMUSG00000002578	226	286	199	2318	1744	1851
ENSMUSG00000002580	614	612	802	850	874	700
ENSMUSG00000002602	9297	13541	9480	681	1636	1983
ENSMUSG00000002603	1846	2015	2985	1044	1284	1397
ENSMUSG00000002608	1725	1691	1737	2081	1889	1984
ENSMUSG00000002617	252	124	327	420	332	339
ENSMUSG00000002625	2440	3412	2758	5789	6092	4808
ENSMUSG00000002633	0	32	53	13	0	0
ENSMUSG00000002635	540	265	258	622	488	552
ENSMUSG00000002658	2527	2386	2522	3076	3849	3896
ENSMUSG00000002660	212	533	726	432	788	669
ENSMUSG00000002661	122	165	174	126	253	227
ENSMUSG00000002664	0	0	0	44	12	1
ENSMUSG00000002668	56	97	70	2	49	6
ENSMUSG00000002679	440	723	879	1121	832	1029
ENSMUSG00000002688	329	533	562	128	211	146
ENSMUSG00000002699	0	28	85	1	0	0
ENSMUSG00000002718	1200	1316	975	1738	1812	1747
ENSMUSG00000002728	359	368	271	594	422	450
ENSMUSG00000002731	235	519	551	455	493	553
ENSMUSG00000002732	1230	1309	1596	137	487	271
ENSMUSG00000002733	1232	1631	1296	1239	1265	1378
ENSMUSG00000002741	2660	3381	4642	3911	3815	3602
ENSMUSG00000002748	5545	7196	5675	9204	8693	10131
ENSMUSG00000002763	2639	2175	2236	3375	3370	2931
ENSMUSG00000002767	569	744	1267	975	1223	1087
ENSMUSG00000002768	549	1088	1127	1269	1520	1245
ENSMUSG00000002769	1	23	39	53	70	93
ENSMUSG00000002771	339	269	58	51	95	194
ENSMUSG00000002778	2123	2660	2563	1836	1779	1938
ENSMUSG00000002781	202	318	305	639	829	722
ENSMUSG00000002797	346	458	334	286	419	419
ENSMUSG00000002799	3326	4324	5990	1371	3655	3691
ENSMUSG00000002803	342	535	306	177	313	265
ENSMUSG00000002804	72	126	416	96	288	85
ENSMUSG00000002808	490	472	598	865	843	1184
ENSMUSG00000002812	5382	5908	4907	6344	6769	6634
ENSMUSG00000002814	495	415	411	663	663	943
ENSMUSG00000002820	376	657	834	1278	1633	1237
ENSMUSG00000002825	665	480	531	1157	980	1220
ENSMUSG00000002831	179	268	622	14	135	143
ENSMUSG00000002833	2875	2367	2407	3815	4578	3509
ENSMUSG00000002835	211	296	467	474	597	751
ENSMUSG00000002844	1550	2108	2478	2755	3127	2647
ENSMUSG00000002845	1930	1927	1292	864	1214	986
ENSMUSG00000002846	153	385	334	600	738	831
ENSMUSG00000002847	35	133	77	22	35	0
ENSMUSG00000002870	362	452	697	1004	1011	1227
ENSMUSG00000002871	1366	1402	1829	1510	1613	1705
ENSMUSG00000002881	2054	2856	2561	2179	1907	2222
ENSMUSG00000002885	1709	2092	2574	5802	6666	6190
ENSMUSG00000002897	1368	1101	1638	1917	1945	2270
ENSMUSG00000002900	19178	23299	20210	655	2156	2033
ENSMUSG00000002908	66	65	160	48	46	36
ENSMUSG00000002910	759	1206	1287	1448	1768	2640
ENSMUSG00000002944	3632	8365	6931	140	625	386
ENSMUSG00000002948	1956	3026	2562	3389	4217	4069
ENSMUSG00000002949	1095	1842	1482	2994	3397	3019
ENSMUSG00000002957	2962	4157	3575	3207	4094	3683
ENSMUSG00000002963	513	658	1224	1053	1313	1189
ENSMUSG00000002968	1032	1602	1916	3743	3361	3633
ENSMUSG00000002980	9201	11874	16053	1396	3280	3196
ENSMUSG00000002981	2736	2662	3092	3812	4205	4099
ENSMUSG00000002983	1642	1509	1788	1327	1362	1619
ENSMUSG00000002984	601	846	942	1287	1709	1424
ENSMUSG00000002985	79842	90868	96499	38009	67074	60821
ENSMUSG00000002996	1703	2710	3476	6126	5709	6878
ENSMUSG00000002997	38	233	157	158	174	360
ENSMUSG00000003031	3877	5995	5971	7907	7686	9515
ENSMUSG00000003032	31776	33657	42933	17909	21088	26990
ENSMUSG00000003033	1889	2013	1216	3453	3765	3506
ENSMUSG00000003037	1202	1319	1217	1353	1441	1234
ENSMUSG00000003038	373	711	575	559	747	797
ENSMUSG00000003039	1414	2257	2250	2180	2146	2174
ENSMUSG00000003051	2	71	173	46	66	84
ENSMUSG00000003062	311	560	508	426	622	405
ENSMUSG00000003068	5630	5788	6724	12602	13954	13167
ENSMUSG00000003070	267	547	410	112	117	130
ENSMUSG00000003072	2248	1505	2496	2800	2646	2975
ENSMUSG00000003099	1395	1630	2224	2103	2563	2672
ENSMUSG00000003119	1906	2806	2545	4003	3637	3895
ENSMUSG00000003123	2237	2026	1718	883	917	796
ENSMUSG00000003131	2294	2722	2408	3649	3469	3536
ENSMUSG00000003134	1602	2698	2836	605	1052	1104
ENSMUSG00000003135	457	634	566	1145	1160	1015
ENSMUSG00000003153	253	465	241	136	117	201
ENSMUSG00000003154	2226	3372	2862	2826	2603	3227
ENSMUSG00000003161	2038	3136	3780	1357	1543	1740
ENSMUSG00000003166	1800	2622	2027	2311	2360	2508
ENSMUSG00000003184	1998	1640	1937	2235	3036	2464
ENSMUSG00000003190	358	411	461	591	555	858
ENSMUSG00000003198	97	202	365	364	265	266
ENSMUSG00000003199	1285	1265	1450	1670	1624	1969
ENSMUSG00000003200	3226	2868	3338	2665	3616	3598
ENSMUSG00000003206	0	10	0	0	1	0
ENSMUSG00000003208	544	260	441	274	287	329
ENSMUSG00000003226	4413	5822	4917	7937	6939	8458
ENSMUSG00000003227	0	21	118	58	89	79
ENSMUSG00000003228	1384	2166	2189	428	428	488
ENSMUSG00000003233	1655	1523	1248	2148	2182	1920
ENSMUSG00000003234	1655	1832	1984	2096	2136	2244
ENSMUSG00000003235	498	869	754	1089	1145	1002
ENSMUSG00000003269	2382	2626	3021	3919	4193	4178
ENSMUSG00000003271	1	15	1	0	2	95
ENSMUSG00000003273	663	531	829	5073	5750	4534
ENSMUSG00000003279	142	57	248	3	48	118
ENSMUSG00000003282	87	159	145	420	337	589
ENSMUSG00000003283	312	81	107	0	5	1
ENSMUSG00000003299	703	1034	1268	1092	922	827
ENSMUSG00000003308	1928	2233	1948	1263	1938	1805
ENSMUSG00000003309	45	150	155	98	49	140
ENSMUSG00000003316	8956	11203	11645	8750	10152	8950
ENSMUSG00000003341	4	1	8	287	398	314
ENSMUSG00000003344	1496	2307	1846	2297	1944	2451
ENSMUSG00000003345	3954	4462	4367	4045	5112	4983
ENSMUSG00000003346	873	779	1142	999	1153	907
ENSMUSG00000003348	459	938	1175	793	1200	1105
ENSMUSG00000003352	151	687	607	457	535	631
ENSMUSG00000003354	0	0	21	0	0	0
ENSMUSG00000003355	95	100	140	21	32	2
ENSMUSG00000003360	4403	5348	5228	6663	6280	6887
ENSMUSG00000003363	1646	1889	2276	1553	1914	1333
ENSMUSG00000003378	1040	1322	1345	1002	1656	1213
ENSMUSG00000003379	0	63	3	61	27	43
ENSMUSG00000003380	4877	4853	5354	5394	6606	6651
ENSMUSG00000003382	2212	2376	2342	2871	3027	3509
ENSMUSG00000003402	2012	2268	1796	2493	2788	2710
ENSMUSG00000003411	0	1	1	60	67	104
ENSMUSG00000003418	134	99	23	0	30	38
ENSMUSG00000003420	7023	9280	9379	1611	2365	2448
ENSMUSG00000003421	573	1399	1355	1290	1304	1205
ENSMUSG00000003423	570	904	661	841	846	994
ENSMUSG00000003429	9741	11076	15807	8111	12618	11473
ENSMUSG00000003435	5838	9175	6046	9243	10963	10119
ENSMUSG00000003436	0	0	21	0	0	0
ENSMUSG00000003437	3583	3853	3887	5283	5192	6022
ENSMUSG00000003438	366	555	840	1281	1252	1011
ENSMUSG00000003444	105	147	102	181	137	266
ENSMUSG00000003452	50	109	77	344	310	390
ENSMUSG00000003458	3213	3650	3695	3466	3806	4315
ENSMUSG00000003464	1586	2202	2006	2056	2782	2415
ENSMUSG00000003469	645	566	896	183	286	428
ENSMUSG00000003477	2	19	50	0	0	1
ENSMUSG00000003484	35	34	22	0	2	1
ENSMUSG00000003500	1465	1945	1801	1658	1830	1680
ENSMUSG00000003518	2258	3125	3407	1354	1408	1294
ENSMUSG00000003526	646	517	519	1869	1871	1668
ENSMUSG00000003527	708	930	566	829	1093	1173
ENSMUSG00000003528	556	1046	1273	1644	1943	2015
ENSMUSG00000003531	642	519	661	626	881	470
ENSMUSG00000003534	3124	3630	5763	7479	9087	8853
ENSMUSG00000003541	12888	11680	17628	6895	7387	9969
ENSMUSG00000003545	150456	119703	138139	184135	167753	184107
ENSMUSG00000003546	985	1198	1006	2443	2687	3059
ENSMUSG00000003549	604	579	441	798	870	1240
ENSMUSG00000003555	2	71	116	2	124	17
ENSMUSG00000003559	917	1006	1064	202	214	227
ENSMUSG00000003573	1223	1525	1747	1169	1332	1306
ENSMUSG00000003575	964	1509	1323	1795	1752	1549
ENSMUSG00000003581	1708	1967	1695	1697	1200	1732
ENSMUSG00000003585	106	246	530	983	1079	1148
ENSMUSG00000003604	206	190	568	222	408	343
ENSMUSG00000003617	21670	28842	23071	562	1264	1050
ENSMUSG00000003623	516	1456	541	650	877	609
ENSMUSG00000003644	284	488	486	145	371	448
ENSMUSG00000003660	4415	4565	5591	7768	8303	8219
ENSMUSG00000003662	579	1003	812	882	809	702
ENSMUSG00000003665	724	299	588	5	35	51
ENSMUSG00000003680	559	619	892	732	750	1076
ENSMUSG00000003721	1268	920	1596	1852	2025	2312
ENSMUSG00000003731	1409	2251	1595	2610	2554	2952
ENSMUSG00000003746	5433	9391	7809	278	571	744
ENSMUSG00000003752	1953	1140	2729	1840	1608	2174
ENSMUSG00000003762	438	469	481	842	1031	995
ENSMUSG00000003778	2174	2762	2455	4347	3855	4795
ENSMUSG00000003779	2	65	287	132	148	98
ENSMUSG00000003808	1178	980	1723	2525	2016	2732
ENSMUSG00000003809	970	653	964	1587	1601	1024
ENSMUSG00000003810	4040	4952	3927	4876	5165	4964
ENSMUSG00000003812	444	389	740	666	1209	1125
ENSMUSG00000003813	1473	1964	1948	1773	2508	2260
ENSMUSG00000003814	22631	23091	23381	19071	20692	23806
ENSMUSG00000003824	86	138	122	13	69	125
ENSMUSG00000003847	10349	13880	10335	11839	9687	13073
ENSMUSG00000003848	1050	1081	658	1706	1334	1799
ENSMUSG00000003849	347	441	494	99	80	81
ENSMUSG00000003863	26	218	220	171	242	271
ENSMUSG00000003865	330	651	594	381	416	591
ENSMUSG00000003868	851	1018	1140	1331	1621	1657
ENSMUSG00000003872	121	2	51	75	71	274
ENSMUSG00000003873	1164	1204	1767	2073	2169	2247
ENSMUSG00000003882	0	4	70	0	16	0
ENSMUSG00000003923	420	795	631	898	784	1013
ENSMUSG00000003929	224	619	133	571	466	490
ENSMUSG00000003934	95	121	228	104	163	197
ENSMUSG00000003948	277	601	629	1042	1098	921
ENSMUSG00000003949	2004	2875	1456	661	794	961
ENSMUSG00000003955	476	558	659	397	507	355
ENSMUSG00000003970	12062	12837	16678	17862	21377	21623
ENSMUSG00000003992	986	1213	986	1191	1373	1219
ENSMUSG00000004018	93	133	160	85	102	92
ENSMUSG00000004031	0	12	1	0	24	0
ENSMUSG00000004032	1065	1415	1228	629	574	740
ENSMUSG00000004035	516	406	271	111	47	29
ENSMUSG00000004040	11123	11534	11337	21032	16529	20860
ENSMUSG00000004043	1658	2060	1910	4924	4811	5189
ENSMUSG00000004044	25725	34344	33665	11349	15249	14360
ENSMUSG00000004054	3769	3898	5010	4736	6150	5180
ENSMUSG00000004056	2217	2806	2377	3155	3269	3061
ENSMUSG00000004069	708	1466	1209	1162	1763	1312
ENSMUSG00000004070	807	1105	1034	682	886	625
ENSMUSG00000004071	1677	1831	1532	2471	2661	2983
ENSMUSG00000004085	1685	2535	2724	1586	1446	1888
ENSMUSG00000004096	1035	1438	1708	1643	2173	1848
ENSMUSG00000004098	17231	19448	14571	6882	7759	6830
ENSMUSG00000004099	1400	2116	1848	5185	4893	4941
ENSMUSG00000004100	983	833	984	1627	1911	1894
ENSMUSG00000004105	2205	3858	4133	6046	6614	6667
ENSMUSG00000004110	402	820	1106	98	128	244
ENSMUSG00000004113	83	13	0	20	25	1
ENSMUSG00000004127	177	118	277	116	311	144
ENSMUSG00000004151	1031	1368	1056	143	236	348
ENSMUSG00000004187	711	738	795	1592	1289	1520
ENSMUSG00000004207	32840	47519	48900	31096	39914	36989
ENSMUSG00000004221	794	1109	1549	1690	1825	1703
ENSMUSG00000004233	203	311	283	365	379	373
ENSMUSG00000004263	1425	1748	958	1270	1409	1609
ENSMUSG00000004264	2598	2578	3153	3374	3795	3589
ENSMUSG00000004266	283	740	328	48	267	79
ENSMUSG00000004267	651	842	684	824	840	740
ENSMUSG00000004268	1126	1284	1963	1763	1674	2197
ENSMUSG00000004270	858	1188	1388	947	1173	919
ENSMUSG00000004285	791	1095	1047	1187	1531	1394
ENSMUSG00000004317	1474	2212	1445	1468	1203	1779
ENSMUSG00000004319	1054	1461	1881	1869	2052	2022
ENSMUSG00000004328	56	56	100	18	2	28
ENSMUSG00000004344	0	0	0	0	18	0
ENSMUSG00000004347	352	430	398	7986	6696	6527
ENSMUSG00000004356	676	1534	1308	2024	1892	2013
ENSMUSG00000004360	1	24	27	74	131	87
ENSMUSG00000004364	2089	3033	3321	4412	3971	4720
ENSMUSG00000004371	31	30	25	0	0	0
ENSMUSG00000004383	810	823	828	883	953	1039
ENSMUSG00000004393	407	944	715	899	1034	1132
ENSMUSG00000004394	1625	2055	1659	2037	2295	2392
ENSMUSG00000004415	1269	2117	1359	4	26	19
ENSMUSG00000004446	85	266	219	292	297	300
ENSMUSG00000004451	1791	1981	2639	1830	1848	1461
ENSMUSG00000004455	1476	1240	1125	1702	1440	2075
ENSMUSG00000004460	2338	2952	2710	2056	2050	2523
ENSMUSG00000004462	326	466	574	679	529	761
ENSMUSG00000004473	1467	2171	1649	90	539	376
ENSMUSG00000004500	103	127	191	266	229	63
ENSMUSG00000004508	2485	2494	2687	846	972	1332
ENSMUSG00000004530	4121	5816	5445	9349	9322	9032
ENSMUSG00000004535	4668	6156	7601	5489	4737	6023
ENSMUSG00000004540	0	0	0	0	1	0
ENSMUSG00000004558	1847	3218	1739	1585	2310	2109
ENSMUSG00000004561	513	722	561	1073	840	1057
ENSMUSG00000004562	5580	5959	5896	6550	6971	6901
ENSMUSG00000004565	1597	1758	1905	1434	1685	1566
ENSMUSG00000004567	1666	1721	1681	2620	2786	2790
ENSMUSG00000004568	1639	1542	1998	1995	2577	2705
ENSMUSG00000004591	2333	2706	2792	3975	3427	4944
ENSMUSG00000004609	43	3	72	0	1	14
ENSMUSG00000004610	3	52	34	54	12	26
ENSMUSG00000004612	0	0	0	0	11	0
ENSMUSG00000004626	500	777	1164	2164	2604	2315
ENSMUSG00000004630	1	0	0	0	13	0
ENSMUSG00000004631	3301	4045	3420	739	1045	1187
ENSMUSG00000004633	314	365	730	31	44	43
ENSMUSG00000004637	278	258	608	460	568	657
ENSMUSG00000004642	1641	1631	1775	3142	2432	3658
ENSMUSG00000004651	290	385	497	6853	6755	7043
ENSMUSG00000004654	0	84	0	0	0	0
ENSMUSG00000004655	77659	95507	100519	1414	4284	4891
ENSMUSG00000004661	452	269	207	726	670	779
ENSMUSG00000004665	1205	2441	2317	2025	2475	2728
ENSMUSG00000004667	1128	1731	2462	3303	3362	2884
ENSMUSG00000004677	2924	3209	3247	5493	4852	5586
ENSMUSG00000004698	60	70	226	13	5	1
ENSMUSG00000004707	0	69	0	0	0	1
ENSMUSG00000004709	2	38	0	28	0	0
ENSMUSG00000004730	131	376	428	1	46	33
ENSMUSG00000004748	49	34	70	78	98	60
ENSMUSG00000004768	641	991	929	654	727	748
ENSMUSG00000004771	1580	2078	1621	1315	947	1045
ENSMUSG00000004788	775	873	932	1493	1753	1416
ENSMUSG00000004789	2605	2772	3325	4521	5122	4941
ENSMUSG00000004791	500	209	196	28	78	3
ENSMUSG00000004798	1344	1862	1772	2059	2240	1485
ENSMUSG00000004814	6	56	104	0	37	0
ENSMUSG00000004815	1259	2144	1483	1994	2294	2437
ENSMUSG00000004837	1001	1452	1097	180	247	202
ENSMUSG00000004843	1138	1618	1645	942	1072	901
ENSMUSG00000004846	3079	4137	4307	3039	3024	2895
ENSMUSG00000004849	902	1453	1107	1236	1003	1404
ENSMUSG00000004864	243	273	455	81	201	142
ENSMUSG00000004865	2080	2380	2716	3703	3139	4545
ENSMUSG00000004872	1119	1571	2306	28045	30381	28449
ENSMUSG00000004880	2611	2493	2141	2271	2362	2939
ENSMUSG00000004885	323	188	339	44	218	228
ENSMUSG00000004891	1332	1720	1096	876	1577	1624
ENSMUSG00000004892	62	74	169	40	124	47
ENSMUSG00000004894	199	141	113	72	121	80
ENSMUSG00000004895	1569	1588	1715	1976	2675	2240
ENSMUSG00000004896	1013	1063	617	1797	1822	1808
ENSMUSG00000004897	3801	4724	5878	5987	6343	7353
ENSMUSG00000004902	0	0	2	6	0	16
ENSMUSG00000004929	467	390	642	1257	1173	1066
ENSMUSG00000004931	1150	1513	1577	1676	1512	1518
ENSMUSG00000004933	26	19	58	31	4	53
ENSMUSG00000004934	1062	1138	1240	1923	2503	2172
ENSMUSG00000004936	1683	1774	1963	2596	3241	2469
ENSMUSG00000004937	2047	2543	2400	4071	5113	4060
ENSMUSG00000004945	893	926	884	709	858	1005
ENSMUSG00000004947	836	746	1068	1667	1528	1858
ENSMUSG00000004951	7624	9838	12927	3283	4905	5294
ENSMUSG00000004952	14428	20228	16508	399	1278	889
ENSMUSG00000004961	0	33	1	13	17	1
ENSMUSG00000004980	22616	29974	26981	41405	39484	46134
ENSMUSG00000004988	0	0	0	22	0	13
ENSMUSG00000004994	146	236	300	370	572	318
ENSMUSG00000004996	387	450	468	597	880	822
ENSMUSG00000005034	2687	3421	3306	3386	4014	3936
ENSMUSG00000005043	830	872	722	286	472	428
ENSMUSG00000005045	0	42	97	17	0	30
ENSMUSG00000005054	1502	1382	1605	693	796	1033
ENSMUSG00000005057	534	657	527	79	49	108
ENSMUSG00000005069	1892	1723	1990	2717	3788	3271
ENSMUSG00000005078	618	951	710	979	863	1148
ENSMUSG00000005087	1823	2535	3408	10305	10242	10717
ENSMUSG00000005089	0	14	0	0	0	0
ENSMUSG00000005102	665	1100	942	1647	1570	2352
ENSMUSG00000005103	2940	4132	4764	8833	8599	10160
ENSMUSG00000005107	278	131	177	903	649	814
ENSMUSG00000005124	191	362	182	6	24	4
ENSMUSG00000005125	15345	17795	18194	9352	11016	11858
ENSMUSG00000005131	26	74	34	30	34	0
ENSMUSG00000005142	1763	2647	2495	2668	3119	3083
ENSMUSG00000005148	3279	2575	2312	1000	2015	2158
ENSMUSG00000005150	548	659	568	965	902	730
ENSMUSG00000005161	1464	1927	1835	1746	1868	2009
ENSMUSG00000005198	7185	11682	11156	14379	15164	14488
ENSMUSG00000005204	1931	1718	2381	2483	2595	2399
ENSMUSG00000005220	424	249	199	1	4	2
ENSMUSG00000005225	635	768	665	2149	2200	2360
ENSMUSG00000005233	9	32	0	0	21	35
ENSMUSG00000005237	116	42	59	45	23	122
ENSMUSG00000005251	589	623	907	412	624	687
ENSMUSG00000005262	851	2264	2073	1805	2309	2499
ENSMUSG00000005267	322	287	283	416	274	231
ENSMUSG00000005268	543	474	1039	332	311	628
ENSMUSG00000005299	1303	2045	1667	2330	2691	2890
ENSMUSG00000005312	1925	3385	3242	3212	3121	3501
ENSMUSG00000005320	158	148	85	14	11	168
ENSMUSG00000005338	3537	4989	4844	199	447	256
ENSMUSG00000005354	1152	1583	1704	1511	1559	1544
ENSMUSG00000005355	78	9	15	0	27	19
ENSMUSG00000005357	0	36	0	0	2	0
ENSMUSG00000005360	522	524	731	44	15	105
ENSMUSG00000005362	436	1140	1130	1190	959	1105
ENSMUSG00000005370	540	756	1037	1757	1475	1849
ENSMUSG00000005371	2521	4049	3521	4909	4612	4236
ENSMUSG00000005373	52	87	51	24	82	96
ENSMUSG00000005374	588	1536	1295	1340	1524	1501
ENSMUSG00000005378	271	643	545	1161	1138	1124
ENSMUSG00000005397	21265	30293	18374	5123	5510	5305
ENSMUSG00000005410	414	256	401	525	852	640
ENSMUSG00000005413	934	924	1274	1031	1091	1580
ENSMUSG00000005417	11242	13903	14269	17074	18722	18476
ENSMUSG00000005442	6922	9173	9300	20222	19051	21390
ENSMUSG00000005447	185	187	124	939	857	768
ENSMUSG00000005465	78	269	197	37	36	57
ENSMUSG00000005469	1281	1717	1936	2467	2250	2407
ENSMUSG00000005470	73	35	28	227	87	20
ENSMUSG00000005481	471	998	1160	1598	2017	2043
ENSMUSG00000005483	9691	11120	16193	13297	18016	18099
ENSMUSG00000005501	764	939	846	1437	1285	1211
ENSMUSG00000005505	421	445	437	398	687	649
ENSMUSG00000005506	3443	5132	3883	6872	5931	6405
ENSMUSG00000005510	403	450	685	708	887	853
ENSMUSG00000005514	1933	2602	2730	3678	4825	3946
ENSMUSG00000005533	1333	2368	1907	4449	3589	4375
ENSMUSG00000005534	3942	6595	4584	3406	4106	3100
ENSMUSG00000005547	0	0	37	0	0	4
ENSMUSG00000005553	29	19	0	0	0	9
ENSMUSG00000005566	5522	5671	6293	8683	10002	10074
ENSMUSG00000005575	1403	1742	1944	2560	2815	2859
ENSMUSG00000005580	699	779	930	2889	2854	2534
ENSMUSG00000005583	1913	2582	1741	3358	3004	3468
ENSMUSG00000005609	960	1052	1296	2368	2448	2520
ENSMUSG00000005610	17336	18421	20164	21497	19893	25419
ENSMUSG00000005611	1	72	73	38	85	67
ENSMUSG00000005615	2500	2380	2500	2718	2608	3335
ENSMUSG00000005621	3088	3426	3025	3050	3619	3858
ENSMUSG00000005625	2054	2880	2615	3575	3452	3506
ENSMUSG00000005628	63	1	22	1	0	64
ENSMUSG00000005656	906	1525	1630	1192	1547	1288
ENSMUSG00000005667	200	193	159	74	153	151
ENSMUSG00000005672	1598	2816	3109	55926	51171	48608
ENSMUSG00000005674	780	878	1053	937	780	864
ENSMUSG00000005677	16	48	31	0	65	32
ENSMUSG00000005682	2136	3292	1960	3880	3891	4009
ENSMUSG00000005683	2796	3588	3948	3786	3984	4794
ENSMUSG00000005686	583	795	868	191	556	427
ENSMUSG00000005687	1540	1623	1832	2698	2518	1988
ENSMUSG00000005698	2348	3494	4140	3845	4064	4385
ENSMUSG00000005699	123	111	354	210	238	268
ENSMUSG00000005705	1	0	1	0	12	8
ENSMUSG00000005718	260	580	886	530	640	841
ENSMUSG00000005763	139	192	84	57	86	138
ENSMUSG00000005774	632	1320	1055	793	961	990
ENSMUSG00000005779	3107	3381	4202	2724	3763	3881
ENSMUSG00000005802	1337	1224	1769	1589	1249	1650
ENSMUSG00000005803	539	851	681	65	43	48
ENSMUSG00000005804	578	578	639	579	572	577
ENSMUSG00000005813	658	1003	869	1255	1106	1082
ENSMUSG00000005823	1902	2019	1745	2474	2373	2793
ENSMUSG00000005824	0	21	25	0	1	0
ENSMUSG00000005836	62	166	170	116	143	57
ENSMUSG00000005846	1315	1229	907	1942	1595	2105
ENSMUSG00000005871	5693	6708	5860	5670	5779	6172
ENSMUSG00000005873	3577	4941	5085	2787	3732	4113
ENSMUSG00000005881	2860	3204	3533	3198	4283	3776
ENSMUSG00000005882	915	521	389	493	741	611
ENSMUSG00000005883	0	0	7	0	0	17
ENSMUSG00000005886	1568	2468	2342	5263	4694	4925
ENSMUSG00000005893	1588	3044	3099	3682	3440	3863
ENSMUSG00000005897	510	693	244	772	897	838
ENSMUSG00000005899	1086	1490	1247	2245	2764	2406
ENSMUSG00000005907	516	734	460	848	534	755
ENSMUSG00000005917	1	34	0	2	6	0
ENSMUSG00000005936	2790	3793	2689	3695	4265	4356
ENSMUSG00000005947	41	6	0	23	33	1
ENSMUSG00000005949	545	792	770	1850	1679	1973
ENSMUSG00000005950	0	31	60	13	0	16
ENSMUSG00000005951	1480	982	694	226	832	326
ENSMUSG00000005952	0	0	0	11	0	0
ENSMUSG00000005958	1245	1397	1471	317	765	898
ENSMUSG00000005968	373	563	917	1988	1879	2090
ENSMUSG00000005973	3203	4224	3261	1132	1491	1473
ENSMUSG00000005980	0	43	14	8	30	18
ENSMUSG00000005981	1765	1982	2968	2784	3981	3194
ENSMUSG00000005982	1038	1438	1203	978	1317	793
ENSMUSG00000005983	174	176	62	102	177	135
ENSMUSG00000005986	84	248	184	334	354	331
ENSMUSG00000005994	3058	3811	7287	71554	63595	75082
ENSMUSG00000006005	4711	5678	4930	7865	7557	7979
ENSMUSG00000006010	927	1642	1928	1316	1196	1228
ENSMUSG00000006014	68	13	31	23	1	16
ENSMUSG00000006019	733	654	965	1329	1293	1321
ENSMUSG00000006021	709	507	794	479	628	600
ENSMUSG00000006024	2288	3343	2407	4055	4960	4708
ENSMUSG00000006050	2597	2812	2955	2476	3372	3660
ENSMUSG00000006057	211	278	199	472	387	366
ENSMUSG00000006058	331	573	448	757	811	749
ENSMUSG00000006095	690	1009	1027	942	956	949
ENSMUSG00000006127	1912	2665	2285	2286	2292	2392
ENSMUSG00000006134	1240	1824	1623	2853	2859	3008
ENSMUSG00000006143	0	33	0	0	0	0
ENSMUSG00000006154	877	731	760	1411	1351	1209
ENSMUSG00000006169	1543	2926	2496	4425	4875	4989
ENSMUSG00000006179	21	24	2	0	0	16
ENSMUSG00000006191	295	526	657	571	776	560
ENSMUSG00000006205	3930	5017	4434	809	1613	1310
ENSMUSG00000006215	1411	1119	1499	2260	1746	1733
ENSMUSG00000006219	187	57	181	41	23	93
ENSMUSG00000006221	0	65	10	0	0	0
ENSMUSG00000006235	47	38	0	0	1	15
ENSMUSG00000006241	58	112	231	147	170	96
ENSMUSG00000006262	988	1030	865	1391	1001	1828
ENSMUSG00000006269	101	303	795	177	387	277
ENSMUSG00000006273	1698	2587	2529	11263	11329	12324
ENSMUSG00000006276	1600	1605	1506	2025	2367	2172
ENSMUSG00000006281	1522	1957	1761	1547	1469	1978
ENSMUSG00000006288	1741	1443	996	1435	1861	1320
ENSMUSG00000006289	528	700	701	890	1109	1121
ENSMUSG00000006299	5197	5911	6018	6006	6354	7472
ENSMUSG00000006301	4071	4814	4646	4517	5620	5259
ENSMUSG00000006304	3391	4613	5310	4750	5170	5443
ENSMUSG00000006307	4136	4593	5741	9572	9478	9718
ENSMUSG00000006310	0	13	0	0	0	0
ENSMUSG00000006313	0	9	1	116	69	36
ENSMUSG00000006315	441	554	1021	563	812	635
ENSMUSG00000006333	7496	7682	11184	8065	11143	9475
ENSMUSG00000006335	581	827	939	555	791	597
ENSMUSG00000006342	817	1449	1451	122	607	488
ENSMUSG00000006344	107	200	283	34	20	24
ENSMUSG00000006345	0	9	0	34	0	0
ENSMUSG00000006356	7895	10401	10919	5010	6508	5568
ENSMUSG00000006360	4440	4424	5793	1876	2623	3053
ENSMUSG00000006362	1715	1946	1941	876	949	890
ENSMUSG00000006369	732	1488	1747	161	531	642
ENSMUSG00000006373	5810	5549	5522	3524	4288	4012
ENSMUSG00000006378	123	183	315	527	779	641
ENSMUSG00000006386	6011	8581	7456	194	908	592
ENSMUSG00000006390	540	1457	1632	2061	2762	2692
ENSMUSG00000006392	548	1026	979	1215	776	1147
ENSMUSG00000006395	1460	2050	936	2108	2285	2704
ENSMUSG00000006398	501	381	439	479	649	888
ENSMUSG00000006403	9229	5625	5727	1096	1482	1525
ENSMUSG00000006411	58	137	194	68	282	299
ENSMUSG00000006412	1510	1993	2030	2942	3481	3145
ENSMUSG00000006418	1388	1696	2143	2295	2101	2117
ENSMUSG00000006423	637	1015	736	1383	1077	1120
ENSMUSG00000006435	1	44	46	0	8	0
ENSMUSG00000006442	749	641	1006	538	627	470
ENSMUSG00000006445	4155	3430	5945	4636	5139	6385
ENSMUSG00000006456	543	771	519	1120	997	1022
ENSMUSG00000006457	37	0	0	22	9	0
ENSMUSG00000006462	15	207	100	0	1	11
ENSMUSG00000006463	110	221	278	322	350	413
ENSMUSG00000006464	326	493	346	488	906	576
ENSMUSG00000006471	1279	1637	1692	2472	2389	2713
ENSMUSG00000006476	2929	3228	2241	5124	4845	4068
ENSMUSG00000006494	1182	1522	1525	418	477	804
ENSMUSG00000006498	10619	9952	12193	11989	11534	14846
ENSMUSG00000006517	224	209	290	408	542	773
ENSMUSG00000006519	1068	1484	1437	1036	1875	1552
ENSMUSG00000006522	2	80	95	0	7	0
ENSMUSG00000006526	527	1161	828	601	580	665
ENSMUSG00000006527	952	779	482	1693	1376	1664
ENSMUSG00000006538	1	0	3	0	2	64
ENSMUSG00000006542	0	0	0	0	18	0
ENSMUSG00000006567	37	25	0	0	0	0
ENSMUSG00000006570	0	0	0	0	0	19
ENSMUSG00000006575	34	13	48	29	23	31
ENSMUSG00000006576	1242	1189	1311	692	608	904
ENSMUSG00000006585	263	375	534	1007	868	1614
ENSMUSG00000006586	1110	1959	1219	24	80	122
ENSMUSG00000006587	0	1	0	13	51	16
ENSMUSG00000006589	543	545	1032	701	827	1011
ENSMUSG00000006599	1122	1435	1271	2733	2819	2851
ENSMUSG00000006611	701	1043	895	576	626	640
ENSMUSG00000006638	112	111	118	118	89	43
ENSMUSG00000006641	263	619	770	911	792	997
ENSMUSG00000006642	0	37	0	0	0	0
ENSMUSG00000006651	114	65	373	14	61	91
ENSMUSG00000006673	1884	2185	2096	2938	2460	3754
ENSMUSG00000006675	394	756	485	230	291	290
ENSMUSG00000006676	5084	6397	6542	10874	11100	12059
ENSMUSG00000006678	471	372	494	614	687	650
ENSMUSG00000006699	5354	7464	7535	6030	6164	6552
ENSMUSG00000006705	551	970	789	999	953	1032
ENSMUSG00000006711	0	0	0	0	0	17
ENSMUSG00000006715	57	68	347	147	157	175
ENSMUSG00000006717	368	293	209	416	459	646
ENSMUSG00000006720	4	64	5	83	40	70
ENSMUSG00000006724	47	29	116	51	78	0
ENSMUSG00000006728	2258	2103	2996	3711	4216	3979
ENSMUSG00000006731	350	250	290	29	100	204
ENSMUSG00000006732	404	400	654	641	320	737
ENSMUSG00000006736	1403	1677	1947	2276	2232	2867
ENSMUSG00000006740	3922	4433	5647	6114	5083	6684
ENSMUSG00000006763	239	351	377	561	474	572
ENSMUSG00000006777	1	0	1	21	1	29
ENSMUSG00000006782	607	810	793	549	843	519
ENSMUSG00000006784	2	18	2	0	96	15
ENSMUSG00000006800	2910	3703	3975	16417	16934	16419
ENSMUSG00000006818	1905	1463	1784	1613	1811	1528
ENSMUSG00000006850	502	675	365	1001	904	506
ENSMUSG00000006906	294	597	369	430	549	500
ENSMUSG00000006920	2913	4350	3191	5108	6039	5478
ENSMUSG00000006930	273	439	428	1107	1624	1223
ENSMUSG00000006931	595	953	913	279	450	564
ENSMUSG00000006932	20291	26456	29612	66889	69197	64991
ENSMUSG00000006941	890	971	1372	756	947	930
ENSMUSG00000006958	235	453	288	63	37	116
ENSMUSG00000006998	3474	3319	3512	4421	5197	5295
ENSMUSG00000007021	0	3	17	50	0	63
ENSMUSG00000007029	2586	3247	3664	2964	3635	3747
ENSMUSG00000007030	2	29	4	44	24	0
ENSMUSG00000007033	62	33	152	164	202	12
ENSMUSG00000007034	0	2	0	16	27	0
ENSMUSG00000007035	266	171	209	296	458	290
ENSMUSG00000007036	2464	2698	3949	1979	2916	2549
ENSMUSG00000007038	1788	1967	1819	3010	2924	3093
ENSMUSG00000007039	3813	3061	2459	598	708	736
ENSMUSG00000007041	3379	4288	4558	2515	2877	4132
ENSMUSG00000007050	124	167	283	597	424	645
ENSMUSG00000007080	88	60	294	108	287	252
ENSMUSG00000007097	3830	3109	1690	65	310	228
ENSMUSG00000007122	1	9	0	0	2	12
ENSMUSG00000007207	345	672	274	644	615	818
ENSMUSG00000007216	140	177	242	205	271	359
ENSMUSG00000007279	76	71	77	70	125	153
ENSMUSG00000007338	617	826	563	739	804	577
ENSMUSG00000007379	635	479	595	753	1047	826
ENSMUSG00000007411	2317	2831	2619	4489	4141	5074
ENSMUSG00000007415	1063	1695	1621	1338	1146	1214
ENSMUSG00000007440	0	35	0	0	0	9
ENSMUSG00000007458	1797	2486	2072	3597	3783	3664
ENSMUSG00000007476	373	728	1148	356	334	315
ENSMUSG00000007480	0	1	25	25	79	6
ENSMUSG00000007564	3686	3993	4880	5188	5268	5299
ENSMUSG00000007570	477	938	787	1697	2043	1654
ENSMUSG00000007589	726	691	805	1024	1090	1173
ENSMUSG00000007591	40	21	1	63	48	39
ENSMUSG00000007594	0	47	25	0	0	0
ENSMUSG00000007603	1641	1994	2270	2333	2822	2379
ENSMUSG00000007610	767	753	999	908	1088	966
ENSMUSG00000007613	1777	1966	1843	4019	2848	3621
ENSMUSG00000007617	473	1144	1184	945	962	1317
ENSMUSG00000007646	61	28	154	228	62	318
ENSMUSG00000007653	1	32	65	140	172	146
ENSMUSG00000007655	12837	17508	16620	2261	4002	4682
ENSMUSG00000007656	2296	2241	3096	2697	2847	2989
ENSMUSG00000007659	1673	2145	2678	857	1273	1508
ENSMUSG00000007670	4230	4385	4656	7513	7710	7521
ENSMUSG00000007682	1	26	1	0	73	31
ENSMUSG00000007721	1327	1969	2185	2010	2461	2607
ENSMUSG00000007739	2394	3156	3649	4340	4230	5207
ENSMUSG00000007777	177	261	429	317	166	164
ENSMUSG00000007783	830	1080	780	44	300	91
ENSMUSG00000007805	627	651	422	22	83	65
ENSMUSG00000007812	435	1221	816	2021	1561	1497
ENSMUSG00000007815	8090	10827	10667	10685	9981	11938
ENSMUSG00000007817	4771	7122	6283	5849	6402	6008
ENSMUSG00000007827	685	708	833	1139	826	1055
ENSMUSG00000007833	1035	916	1205	1766	1608	2074
ENSMUSG00000007836	7758	9381	10448	10125	12303	12111
ENSMUSG00000007837	343	524	577	312	264	358
ENSMUSG00000007850	26047	29716	26161	44194	32913	45737
ENSMUSG00000007867	729	788	905	601	699	534
ENSMUSG00000007872	8702	8353	10605	15567	13145	19421
ENSMUSG00000007877	0	0	0	8	1	20
ENSMUSG00000007880	5500	6833	6531	10744	11165	10697
ENSMUSG00000007888	194	191	202	127	82	134
ENSMUSG00000007891	8073	9426	10171	11645	14523	14460
ENSMUSG00000007892	3135	2937	4081	3957	5046	4860
ENSMUSG00000007908	393	436	127	7	7	25
ENSMUSG00000007944	0	5	0	29	0	0
ENSMUSG00000007946	0	18	1	0	0	29
ENSMUSG00000007950	645	905	662	864	772	763
ENSMUSG00000007987	159	495	506	819	945	770
ENSMUSG00000007989	272	282	483	638	624	936
ENSMUSG00000008028	12	0	26	0	0	5
ENSMUSG00000008035	2755	3965	2923	4997	5995	5030
ENSMUSG00000008036	937	703	1154	1160	1298	881
ENSMUSG00000008090	601	575	404	132	215	374
ENSMUSG00000008129	0	0	24	70	107	96
ENSMUSG00000008136	71	80	37	2	47	53
ENSMUSG00000008140	3162	3324	4046	2744	3047	2850
ENSMUSG00000008153	2	75	108	95	154	44
ENSMUSG00000008167	613	497	666	916	927	908
ENSMUSG00000008193	1	14	45	0	3	15
ENSMUSG00000008200	4357	4473	4325	7521	6861	7690
ENSMUSG00000008206	2810	3186	3475	5555	6746	6438
ENSMUSG00000008226	474	402	225	438	521	453
ENSMUSG00000008301	244	543	887	688	567	757
ENSMUSG00000008305	1879	2105	2109	2122	1894	1984
ENSMUSG00000008307	4	105	5	320	174	297
ENSMUSG00000008318	229	158	142	186	109	139
ENSMUSG00000008333	392	895	771	551	762	781
ENSMUSG00000008348	43490	38641	51387	53531	55514	70937
ENSMUSG00000008373	566	998	1324	1432	1623	1641
ENSMUSG00000008384	5952	5436	8463	4247	5685	6490
ENSMUSG00000008393	3288	2925	2616	1145	1501	1600
ENSMUSG00000008398	3770	6368	5639	2640	3064	2892
ENSMUSG00000008429	1294	2039	2302	3013	2795	2761
ENSMUSG00000008435	541	598	703	1129	991	817
ENSMUSG00000008438	0	0	1	11	23	0
ENSMUSG00000008450	80	191	148	198	211	163
ENSMUSG00000008461	0	17	63	0	0	18
ENSMUSG00000008475	3402	3939	3347	4363	4742	4647
ENSMUSG00000008489	0	17	2	0	0	27
ENSMUSG00000008496	26	50	59	9	127	29
ENSMUSG00000008540	603	1110	1091	941	1064	1232
ENSMUSG00000008575	7856	9529	10344	4688	5438	7393
ENSMUSG00000008601	77	84	197	95	114	144
ENSMUSG00000008604	1619	2279	2509	4159	4274	4234
ENSMUSG00000008658	72	50	29	0	5	0
ENSMUSG00000008668	1255	1205	1512	2301	2927	2744
ENSMUSG00000008682	1964	2261	1815	2415	2791	3755
ENSMUSG00000008683	1159	1181	1225	3434	2534	2544
ENSMUSG00000008690	1912	2091	2806	2725	3264	3612
ENSMUSG00000008730	7119	8876	7466	8682	7481	7742
ENSMUSG00000008734	4768	6848	6128	5349	4786	4362
ENSMUSG00000008763	1602	2294	1990	1785	1660	2049
ENSMUSG00000008822	151	277	157	238	262	242
ENSMUSG00000008845	477	661	857	30	58	52
ENSMUSG00000008855	4423	5082	5084	11341	11345	11675
ENSMUSG00000008859	683	1078	1356	1053	1133	1323
ENSMUSG00000008892	306	316	328	518	443	526
ENSMUSG00000008932	1	0	21	0	0	0
ENSMUSG00000008958	1489	1299	1722	1870	1772	1973
ENSMUSG00000008976	1412	2190	1976	2094	2343	2238
ENSMUSG00000008999	2215	3624	2667	256	567	586
ENSMUSG00000009013	3104	3222	3283	3602	3452	4925
ENSMUSG00000009030	1373	1202	1109	1253	920	1178
ENSMUSG00000009035	2315	2650	2753	1436	1511	2009
ENSMUSG00000009073	2491	4350	4367	5423	5477	6101
ENSMUSG00000009075	0	0	0	0	16	0
ENSMUSG00000009076	309	363	780	587	470	376
ENSMUSG00000009079	6628	6729	5347	11671	10702	10553
ENSMUSG00000009090	922	1208	1958	2126	2279	2876
ENSMUSG00000009092	0	1	0	1	74	44
ENSMUSG00000009093	0	6	0	0	0	0
ENSMUSG00000009097	3333	3314	5735	1153	1834	1923
ENSMUSG00000009108	2	81	0	0	1	2
ENSMUSG00000009112	982	1238	1771	1709	1881	2109
ENSMUSG00000009115	1	0	28	16	99	0
ENSMUSG00000009145	186	241	209	245	363	207
ENSMUSG00000009185	31	118	371	0	1	41
ENSMUSG00000009207	184	331	497	704	399	614
ENSMUSG00000009210	0	1	42	0	4	0
ENSMUSG00000009246	0	0	0	26	58	17
ENSMUSG00000009248	53	4	104	0	3	34
ENSMUSG00000009281	3381	3037	2474	40	254	470
ENSMUSG00000009291	9186	9905	7448	5201	6277	5474
ENSMUSG00000009293	1568	1423	2037	1526	1717	1559
ENSMUSG00000009350	1	0	0	13	0	0
ENSMUSG00000009356	0	0	0	9	0	0
ENSMUSG00000009376	658	945	1120	6563	5851	6667
ENSMUSG00000009378	106	94	202	32	27	19
ENSMUSG00000009394	213	237	60	37	2	3
ENSMUSG00000009406	558	1027	560	963	1031	1000
ENSMUSG00000009418	11421	13084	9327	16607	15070	15515
ENSMUSG00000009470	3298	4719	3753	4491	4867	5308
ENSMUSG00000009535	520	734	676	1187	694	1279
ENSMUSG00000009545	81	111	129	12	5	29
ENSMUSG00000009549	1079	1026	1743	1724	1937	1890
ENSMUSG00000009551	48	19	27	0	29	6
ENSMUSG00000009555	1902	2235	2690	5270	4953	6038
ENSMUSG00000009563	510	773	862	831	653	723
ENSMUSG00000009566	883	917	1015	1607	1547	2193
ENSMUSG00000009569	3136	3991	3053	3157	2889	3011
ENSMUSG00000009575	3430	4635	3507	6446	5841	7142
ENSMUSG00000009585	1047	1808	1642	243	433	330
ENSMUSG00000009614	1991	1278	1862	511	1060	824
ENSMUSG00000009621	1459	2129	1797	1720	1480	1437
ENSMUSG00000009628	0	19	0	1	0	0
ENSMUSG00000009630	2211	2276	2289	2348	2324	2275
ENSMUSG00000009633	745	602	939	314	455	530
ENSMUSG00000009640	463	512	1029	540	697	646
ENSMUSG00000009647	801	711	462	358	443	530
ENSMUSG00000009654	1	0	0	0	0	6
ENSMUSG00000009681	5193	6033	7081	3747	4507	5179
ENSMUSG00000009687	1419	2153	2143	406	730	767
ENSMUSG00000009731	266	242	220	27	22	47
ENSMUSG00000009733	730	710	781	1576	1761	1286
ENSMUSG00000009734	0	0	17	0	0	0
ENSMUSG00000009739	1645	2453	2315	5148	4219	4592
ENSMUSG00000009741	3683	5043	4084	6908	5755	7325
ENSMUSG00000009772	403	482	720	67	167	111
ENSMUSG00000009828	1363	1532	1013	1747	1538	1528
ENSMUSG00000009863	1314	1404	1479	1219	1954	1497
ENSMUSG00000009876	92	38	2	17	12	104
ENSMUSG00000009894	306	346	822	337	491	381
ENSMUSG00000009900	64	50	0	0	42	18
ENSMUSG00000009905	1158	1054	1481	3085	2610	3227
ENSMUSG00000009907	1606	1645	1950	2372	2155	2463
ENSMUSG00000009927	421	479	459	635	497	545
ENSMUSG00000009941	0	53	83	0	1	2
ENSMUSG00000009995	1560	1917	1417	3189	3383	3198
ENSMUSG00000010021	0	59	58	28	150	65
ENSMUSG00000010025	1380	1965	1718	1664	1937	1609
ENSMUSG00000010044	45	12	78	183	97	151
ENSMUSG00000010045	403	666	918	745	1036	783
ENSMUSG00000010047	980	1049	1756	512	380	511
ENSMUSG00000010048	600	434	538	721	1102	874
ENSMUSG00000010051	404	463	452	217	319	225
ENSMUSG00000010054	756	942	965	976	897	788
ENSMUSG00000010057	158	246	456	711	842	1208
ENSMUSG00000010066	72	75	0	18	10	23
ENSMUSG00000010067	3380	3072	3673	3757	3898	5148
ENSMUSG00000010080	190	183	439	154	164	263
ENSMUSG00000010086	0	24	0	0	40	0
ENSMUSG00000010095	8461	9420	10668	13699	14640	15491
ENSMUSG00000010097	7300	8112	7360	13161	13275	13115
ENSMUSG00000010110	2777	2940	3792	4079	3927	4243
ENSMUSG00000010122	1	2	58	0	0	8
ENSMUSG00000010142	0	22	45	1	1	0
ENSMUSG00000010154	218	69	183	68	131	54
ENSMUSG00000010175	4448	4877	5683	1200	2175	2362
ENSMUSG00000010205	1381	1823	2045	2499	2136	1911
ENSMUSG00000010277	6937	8586	7722	11712	10590	10999
ENSMUSG00000010290	702	648	529	548	562	483
ENSMUSG00000010307	393	398	463	155	152	239
ENSMUSG00000010311	51	48	54	40	20	29
ENSMUSG00000010342	71	37	29	27	9	36
ENSMUSG00000010358	709	871	827	1526	1395	1228
ENSMUSG00000010362	193	563	648	922	827	857
ENSMUSG00000010376	1767	1821	2057	1719	2498	2147
ENSMUSG00000010392	1200	1691	1736	1625	1725	1851
ENSMUSG00000010406	967	450	704	984	924	817
ENSMUSG00000010453	2321	3444	3008	5516	5391	5610
ENSMUSG00000010476	1188	2063	1830	48	183	121
ENSMUSG00000010492	32	71	23	11	17	0
ENSMUSG00000010517	888	1456	1022	1756	1616	1465
ENSMUSG00000010529	0	18	0	0	0	1
ENSMUSG00000010538	0	0	60	14	16	15
ENSMUSG00000010554	988	1254	991	1329	1368	1410
ENSMUSG00000010601	0	0	49	0	1	0
ENSMUSG00000010607	103	195	150	260	384	197
ENSMUSG00000010608	5795	6936	7134	12805	9629	11374
ENSMUSG00000010609	1194	1698	2100	4459	4805	4614
ENSMUSG00000010651	0	3	86	86	28	292
ENSMUSG00000010660	1161	1202	988	1005	1142	1277
ENSMUSG00000010663	2101	2739	2584	2992	3747	3253
ENSMUSG00000010721	662	1240	793	423	705	456
ENSMUSG00000010751	297	562	325	208	220	218
ENSMUSG00000010755	976	895	856	1448	1381	1617
ENSMUSG00000010760	2	16	69	25	55	17
ENSMUSG00000010797	0	7	0	19	1	23
ENSMUSG00000010803	1	0	0	13	112	0
ENSMUSG00000010825	21	1	28	44	1	0
ENSMUSG00000010830	916	1111	614	87	86	91
ENSMUSG00000010841	0	0	0	1	36	0
ENSMUSG00000010911	494	360	353	427	542	635
ENSMUSG00000010914	453	486	325	696	632	828
ENSMUSG00000010936	429	701	1004	1741	1749	1865
ENSMUSG00000011008	109	106	210	1764	1137	1777
ENSMUSG00000011034	0	37	39	1	1	0
ENSMUSG00000011096	1882	2043	2346	2793	2660	3073
ENSMUSG00000011114	1439	2138	2488	1363	1704	1610
ENSMUSG00000011118	0	0	32	18	75	17
ENSMUSG00000011148	162	108	210	1348	1543	1525
ENSMUSG00000011158	2473	2326	2008	4379	4155	4076
ENSMUSG00000011171	0	43	37	46	61	42
ENSMUSG00000011179	2792	2684	3560	2650	2869	3280
ENSMUSG00000011254	322	271	295	419	334	393
ENSMUSG00000011256	5005	6728	3439	47	186	148
ENSMUSG00000011257	1181	1167	1264	1111	1273	1405
ENSMUSG00000011263	1008	966	1914	34	176	185
ENSMUSG00000011267	232	277	210	35	306	278
ENSMUSG00000011305	49	109	35	1	3	14
ENSMUSG00000011306	934	1086	1667	1657	1569	1305
ENSMUSG00000011382	324	759	634	228	378	210
ENSMUSG00000011427	251	434	432	557	415	510
ENSMUSG00000011589	80	25	0	0	3	0
ENSMUSG00000011632	1	0	50	0	1	0
ENSMUSG00000011658	308	907	584	672	772	695
ENSMUSG00000011751	0	27	0	1	1	10
ENSMUSG00000011752	195	146	235	358	355	453
ENSMUSG00000011831	550	2112	1062	1303	1226	1788
ENSMUSG00000011832	853	1697	1504	1940	2056	1925
ENSMUSG00000011837	318	303	622	297	402	452
ENSMUSG00000011877	4501	5780	6185	4037	5143	4527
ENSMUSG00000011884	1051	1393	1937	906	1118	1250
ENSMUSG00000011958	3033	3594	3853	4102	3654	3532
ENSMUSG00000011960	1681	2315	1785	3813	3531	3520
ENSMUSG00000012017	4407	4475	3033	340	529	337
ENSMUSG00000012076	763	827	925	1209	1285	905
ENSMUSG00000012114	1795	2497	3019	2950	3196	4098
ENSMUSG00000012117	659	1119	1234	1487	1795	1696
ENSMUSG00000012123	93	260	406	166	229	223
ENSMUSG00000012126	86	185	161	295	255	290
ENSMUSG00000012187	1	2	1	32	0	20
ENSMUSG00000012296	1086	1661	1502	1409	1588	1691
ENSMUSG00000012350	77	33	31	71	124	247
ENSMUSG00000012405	1468	1327	1435	1746	2148	2271
ENSMUSG00000012422	1091	1271	1114	659	844	1077
ENSMUSG00000012428	6393	8590	6569	209	657	626
ENSMUSG00000012429	208	415	448	233	223	432
ENSMUSG00000012443	147	56	1	94	116	82
ENSMUSG00000012483	109	223	126	177	200	145
ENSMUSG00000012519	228	470	468	169	99	304
ENSMUSG00000012535	2110	2624	2264	3114	4235	3732
ENSMUSG00000012609	895	638	523	1033	963	1246
ENSMUSG00000012640	320	527	566	1797	969	1165
ENSMUSG00000012705	1	12	0	0	0	0
ENSMUSG00000012819	0	12	0	0	15	16
ENSMUSG00000012848	6391	7046	9943	7429	10546	10070
ENSMUSG00000013033	1413	1924	1908	3178	2933	3018
ENSMUSG00000013076	6873	9912	8638	4675	6340	5811
ENSMUSG00000013089	895	1621	1562	676	773	749
ENSMUSG00000013091	0	16	0	0	0	0
ENSMUSG00000013150	424	422	514	281	345	375
ENSMUSG00000013155	316	140	347	409	349	496
ENSMUSG00000013158	0	0	0	13	0	0
ENSMUSG00000013160	889	1078	734	1989	1679	1592
ENSMUSG00000013236	5438	6537	6697	6445	8892	9172
ENSMUSG00000013275	8950	7704	10772	5909	6757	8120
ENSMUSG00000013338	0	37	0	0	0	0
ENSMUSG00000013367	427	111	129	20	12	55
ENSMUSG00000013415	0	0	0	0	0	1
ENSMUSG00000013418	1	0	0	20	0	0
ENSMUSG00000013419	1780	2325	2107	1454	1748	1639
ENSMUSG00000013465	2670	3347	2535	3893	3781	4161
ENSMUSG00000013483	1	32	1	20	70	35
ENSMUSG00000013495	378	558	962	437	835	507
ENSMUSG00000013523	192	214	298	13	140	70
ENSMUSG00000013584	70	81	105	1	20	3
ENSMUSG00000013593	4050	4431	4251	4888	5385	5326
ENSMUSG00000013622	1424	1811	1638	1696	1775	1820
ENSMUSG00000013629	1442	2686	2633	4506	4241	3817
ENSMUSG00000013646	1157	889	1116	1365	1597	1498
ENSMUSG00000013662	1074	2416	2190	3200	2769	3193
ENSMUSG00000013663	4434	6032	5445	11418	9218	11640
ENSMUSG00000013698	4421	5128	6173	2860	3267	2766
ENSMUSG00000013701	458	242	245	313	396	250
ENSMUSG00000013707	1	0	16	5	0	0
ENSMUSG00000013736	302	548	880	1030	958	1323
ENSMUSG00000013766	26	34	24	0	0	0
ENSMUSG00000013787	5154	6651	6985	8757	10158	9600
ENSMUSG00000013822	218	297	511	379	421	647
ENSMUSG00000013833	843	1400	1565	1475	2154	1239
ENSMUSG00000013846	2570	3558	2962	6250	7043	5951
ENSMUSG00000013858	4224	4684	4853	6809	8133	7333
ENSMUSG00000013878	327	447	447	364	672	545
ENSMUSG00000013921	861	1593	1271	110	356	181
ENSMUSG00000013928	0	28	0	0	0	0
ENSMUSG00000013973	891	1209	930	1865	1754	1737
ENSMUSG00000013997	555	1181	583	995	1156	1425
ENSMUSG00000014039	300	557	674	963	988	841
ENSMUSG00000014074	1016	1238	991	1062	1355	971
ENSMUSG00000014075	49	136	168	143	216	150
ENSMUSG00000014077	1616	2007	2467	2855	2893	3193
ENSMUSG00000014158	1671	2095	2515	920	1109	1407
ENSMUSG00000014164	850	1130	1113	68	159	140
ENSMUSG00000014177	1243	1451	1472	1224	827	1064
ENSMUSG00000014195	3980	5548	4545	7036	6293	7093
ENSMUSG00000014198	0	32	30	67	35	78
ENSMUSG00000014226	759	746	1632	1860	1530	1801
ENSMUSG00000014232	155	369	317	328	487	421
ENSMUSG00000014243	96	67	172	133	140	73
ENSMUSG00000014245	128	253	138	378	307	524
ENSMUSG00000014294	460	633	558	784	709	703
ENSMUSG00000014301	13	72	54	85	80	78
ENSMUSG00000014303	1933	2472	1529	120	145	336
ENSMUSG00000014313	2360	1709	2868	1289	1745	1959
ENSMUSG00000014329	3850	6077	2306	41	139	115
ENSMUSG00000014349	2764	2800	2804	3141	3207	3648
ENSMUSG00000014353	2054	2517	2536	3400	2425	3338
ENSMUSG00000014355	3769	4843	4993	5205	5945	6384
ENSMUSG00000014361	952	1410	1272	434	487	782
ENSMUSG00000014402	414	805	867	974	762	1075
ENSMUSG00000014418	1193	1900	1718	2218	2037	2506
ENSMUSG00000014426	774	1764	1868	2785	2490	3101
ENSMUSG00000014444	11293	11710	11917	13691	15066	15786
ENSMUSG00000014470	905	1097	636	1040	1145	949
ENSMUSG00000014496	1725	2472	2323	8474	5833	7491
ENSMUSG00000014498	2430	2734	2359	4535	4330	4698
ENSMUSG00000014503	31	76	72	64	70	26
ENSMUSG00000014504	413	758	487	850	507	900
ENSMUSG00000014547	272	539	738	611	548	706
ENSMUSG00000014550	1385	1926	1998	2573	2806	2728
ENSMUSG00000014551	343	572	436	380	635	642
ENSMUSG00000014554	743	793	808	798	843	996
ENSMUSG00000014592	763	897	1052	1652	2089	1866
ENSMUSG00000014599	2927	4005	3752	1373	1719	1850
ENSMUSG00000014601	1155	1460	1624	1954	2410	2163
ENSMUSG00000014602	57	156	141	5	40	102
ENSMUSG00000014603	0	0	36	0	0	0
ENSMUSG00000014606	1196	1582	1470	980	1359	1565
ENSMUSG00000014609	0	34	0	0	0	0
ENSMUSG00000014633	220	133	92	147	184	278
ENSMUSG00000014668	979	1236	1143	1664	1781	2023
ENSMUSG00000014686	0	0	44	0	8	0
ENSMUSG00000014704	31	55	9	0	21	0
ENSMUSG00000014747	0	0	0	5	0	0
ENSMUSG00000014748	1806	2307	2260	2784	3280	2541
ENSMUSG00000014763	692	1095	832	1198	1320	1272
ENSMUSG00000014767	448	830	511	669	703	928
ENSMUSG00000014769	1133	1158	1455	1308	1230	1734
ENSMUSG00000014771	178	290	345	259	480	370
ENSMUSG00000014773	1690	2099	2770	162	421	429
ENSMUSG00000014776	71	112	100	78	73	129
ENSMUSG00000014778	997	1183	915	1885	2050	1908
ENSMUSG00000014786	103	204	58	191	101	173
ENSMUSG00000014791	387	508	614	113	282	420
ENSMUSG00000014813	627	382	458	25	84	122
ENSMUSG00000014837	100	150	217	114	282	58
ENSMUSG00000014846	2433	2628	2822	1045	1609	1499
ENSMUSG00000014850	397	407	935	543	449	320
ENSMUSG00000014856	163	590	604	690	984	990
ENSMUSG00000014859	767	1399	1639	1597	1940	2069
ENSMUSG00000014867	4127	5463	5698	3163	4118	3936
ENSMUSG00000014873	462	1190	884	2180	1583	2043
ENSMUSG00000014905	3161	2721	4255	4013	4356	5710
ENSMUSG00000014907	123	335	328	654	408	499
ENSMUSG00000014932	1327	1428	1699	1727	1526	1709
ENSMUSG00000014956	4055	5386	4372	6098	5971	6962
ENSMUSG00000014959	2182	2542	2370	2580	2527	2340
ENSMUSG00000014980	114	233	199	167	270	282
ENSMUSG00000015002	2139	3010	2513	2337	2366	2765
ENSMUSG00000015013	403	532	588	687	778	638
ENSMUSG00000015016	320	279	373	450	509	466
ENSMUSG00000015023	894	894	918	1171	1361	1392
ENSMUSG00000015027	157	200	447	525	481	442
ENSMUSG00000015053	3378	3561	4593	492	992	1269
ENSMUSG00000015083	0	0	1	29	50	46
ENSMUSG00000015085	4494	6136	4496	99	470	213
ENSMUSG00000015087	2224	2463	2379	3458	3532	3315
ENSMUSG00000015090	976	900	1195	15328	17154	15806
ENSMUSG00000015092	1116	1128	1397	1471	1557	1424
ENSMUSG00000015093	0	92	1	26	88	51
ENSMUSG00000015094	3430	4315	4044	2031	2783	2107
ENSMUSG00000015095	1148	1590	1247	1845	2661	1798
ENSMUSG00000015112	4	64	34	98	51	92
ENSMUSG00000015120	3254	3351	2793	5710	4292	5228
ENSMUSG00000015126	431	338	303	441	530	387
ENSMUSG00000015127	218	829	821	917	1366	1006
ENSMUSG00000015133	1591	2655	2561	163	417	343
ENSMUSG00000015134	351	205	139	3	94	162
ENSMUSG00000015143	5309	6635	7939	2471	3310	3592
ENSMUSG00000015149	2201	3256	3023	4318	5949	5325
ENSMUSG00000015165	13061	12504	15071	21867	23685	27024
ENSMUSG00000015176	1746	2678	1964	2414	2935	3161
ENSMUSG00000015189	1338	1188	883	1065	1188	1115
ENSMUSG00000015202	1672	1656	1306	452	446	528
ENSMUSG00000015214	678	1165	775	703	856	1140
ENSMUSG00000015217	240	190	235	56	193	143
ENSMUSG00000015222	360	622	286	49	156	141
ENSMUSG00000015224	652	540	321	519	752	751
ENSMUSG00000015243	6282	8907	8323	4182	4044	4604
ENSMUSG00000015247	465	461	348	571	570	301
ENSMUSG00000015289	472	525	699	437	537	617
ENSMUSG00000015290	667	867	971	1000	1216	1115
ENSMUSG00000015291	5577	6956	6192	9426	10745	9724
ENSMUSG00000015305	6900	8920	6625	6808	6538	6267
ENSMUSG00000015312	15484	13046	21902	9908	9365	14396
ENSMUSG00000015314	38	0	0	1	0	0
ENSMUSG00000015335	58	175	108	87	168	60
ENSMUSG00000015337	119	107	35	123	81	168
ENSMUSG00000015340	504	309	607	1	33	4
ENSMUSG00000015341	1595	2161	1421	3311	3226	4389
ENSMUSG00000015342	66	60	19	18	55	66
ENSMUSG00000015354	736	603	789	5688	5285	5935
ENSMUSG00000015355	1	75	53	0	0	0
ENSMUSG00000015357	1121	1270	1754	1877	1824	1841
ENSMUSG00000015363	1032	1604	1175	2204	2128	1952
ENSMUSG00000015377	696	942	1200	2167	1599	1522
ENSMUSG00000015396	199	102	211	3	12	15
ENSMUSG00000015405	64	78	24	0	40	24
ENSMUSG00000015451	130	71	84	251	161	237
ENSMUSG00000015452	176	118	260	3	62	154
ENSMUSG00000015461	1734	2105	1956	1820	2269	2560
ENSMUSG00000015467	128	267	326	421	432	424
ENSMUSG00000015468	525	497	345	136	422	389
ENSMUSG00000015474	139	334	392	409	505	490
ENSMUSG00000015476	409	456	403	196	161	269
ENSMUSG00000015478	336	655	674	1287	1308	1120
ENSMUSG00000015488	1104	1462	822	1130	1077	1421
ENSMUSG00000015501	2061	2385	2046	3067	2601	3466
ENSMUSG00000015522	2767	4730	3366	4498	4156	4455
ENSMUSG00000015533	160	371	671	132	270	187
ENSMUSG00000015536	1226	1613	1310	1385	1784	2013
ENSMUSG00000015542	307	533	444	643	903	725
ENSMUSG00000015568	1718	2787	2371	323	479	453
ENSMUSG00000015575	844	1277	1350	977	1226	1386
ENSMUSG00000015597	1182	1773	1571	3397	2783	3942
ENSMUSG00000015599	0	0	0	11	0	19
ENSMUSG00000015605	4975	4957	6220	15200	17701	19173
ENSMUSG00000015619	441	542	1381	516	918	1367
ENSMUSG00000015647	6985	8594	10447	1688	3602	4285
ENSMUSG00000015652	0	0	60	0	1	0
ENSMUSG00000015653	215	334	204	55	80	78
ENSMUSG00000015656	12303	12414	16382	12668	16931	18634
ENSMUSG00000015659	275	392	491	1203	1238	1139
ENSMUSG00000015665	0	0	29	0	28	6
ENSMUSG00000015668	396	774	602	416	597	519
ENSMUSG00000015671	1020	1361	1626	1517	1878	1615
ENSMUSG00000015672	10	275	190	254	184	387
ENSMUSG00000015697	1318	1960	1981	2975	3309	3137
ENSMUSG00000015702	174	107	207	47	83	44
ENSMUSG00000015709	632	663	536	10275	10985	9309
ENSMUSG00000015711	89	641	388	811	711	552
ENSMUSG00000015714	3638	4734	4815	5507	5267	4652
ENSMUSG00000015733	2329	3369	3439	3635	3271	3699
ENSMUSG00000015745	1098	1126	1417	2454	2039	2273
ENSMUSG00000015747	296	349	459	602	523	703
ENSMUSG00000015748	1077	1268	1194	1801	1656	2079
ENSMUSG00000015749	4216	4477	5958	9306	8998	10303
ENSMUSG00000015750	625	1173	662	1135	1201	1038
ENSMUSG00000015755	2903	3130	3207	4838	4350	5468
ENSMUSG00000015757	1135	1546	1358	2073	1887	1608
ENSMUSG00000015759	539	916	748	619	540	805
ENSMUSG00000015766	2251	2434	2186	471	730	734
ENSMUSG00000015776	1531	1816	1799	2215	2336	2183
ENSMUSG00000015790	856	976	1121	1297	1175	1269
ENSMUSG00000015804	731	1128	880	846	860	1187
ENSMUSG00000015806	1157	1827	1831	1236	1701	1498
ENSMUSG00000015812	80	44	80	104	129	124
ENSMUSG00000015829	35	34	0	3	2	0
ENSMUSG00000015837	19235	17917	19017	41897	40892	46499
ENSMUSG00000015839	2390	2615	2868	4835	4856	4940
ENSMUSG00000015843	86	250	97	104	216	220
ENSMUSG00000015846	3778	5177	5690	4734	6392	6040
ENSMUSG00000015850	3894	5145	4824	13827	16431	13849
ENSMUSG00000015852	318	346	425	2	23	2
ENSMUSG00000015854	0	0	12	0	0	0
ENSMUSG00000015869	1070	1571	1259	3205	3199	3018
ENSMUSG00000015879	0	9	1	14	0	18
ENSMUSG00000015880	10	12	162	17	43	54
ENSMUSG00000015882	554	427	650	1062	584	785
ENSMUSG00000015889	1586	1818	1895	6081	5074	5059
ENSMUSG00000015890	1	4	2	268	270	177
ENSMUSG00000015932	3323	5315	5079	3107	4062	4180
ENSMUSG00000015937	1392	1653	2226	1589	2232	1703
ENSMUSG00000015942	123	559	233	531	664	730
ENSMUSG00000015943	274	66	156	136	153	227
ENSMUSG00000015944	601	709	678	975	1168	900
ENSMUSG00000015947	29	34	66	0	1	1
ENSMUSG00000015950	2	66	111	0	21	22
ENSMUSG00000015957	174	62	185	71	23	28
ENSMUSG00000015961	2129	2600	2996	2138	2062	2398
ENSMUSG00000015966	0	106	1	16	35	34
ENSMUSG00000015968	3	246	221	15	150	101
ENSMUSG00000015970	64	610	455	161	655	471
ENSMUSG00000015971	1120	660	1275	1036	1408	933
ENSMUSG00000015980	81	82	2	90	39	35
ENSMUSG00000015981	293	333	369	4	67	18
ENSMUSG00000015994	1333	1321	1261	1444	1832	1827
ENSMUSG00000016018	1130	1635	1542	2088	2094	2463
ENSMUSG00000016024	4564	6406	7350	170	414	456
ENSMUSG00000016028	3357	2684	3636	635	1526	1433
ENSMUSG00000016087	1854	3450	2781	133	229	241
ENSMUSG00000016128	3966	4537	3228	2550	3486	3230
ENSMUSG00000016150	1	19	1	0	28	0
ENSMUSG00000016179	0	36	0	1	2	7
ENSMUSG00000016181	632	945	697	1283	1131	1503
ENSMUSG00000016194	544	909	691	186	169	164
ENSMUSG00000016200	0	0	0	0	0	19
ENSMUSG00000016206	724	1028	567	77	89	173
ENSMUSG00000016239	226	168	97	229	315	255
ENSMUSG00000016252	699	1193	1433	1277	1318	1246
ENSMUSG00000016253	860	1334	1468	2321	2643	2293
ENSMUSG00000016256	4939	6602	6082	5814	6860	5869
ENSMUSG00000016257	454	575	871	790	812	1075
ENSMUSG00000016262	837	994	1154	250	550	438
ENSMUSG00000016283	21	13	114	33	110	20
ENSMUSG00000016308	361	369	823	761	634	892
ENSMUSG00000016319	1763	1969	2669	2575	2627	2713
ENSMUSG00000016344	823	903	961	686	1113	780
ENSMUSG00000016349	87	58	47	1158	1782	1144
ENSMUSG00000016356	406	427	363	511	727	645
ENSMUSG00000016382	3439	3585	3942	884	1273	1484
ENSMUSG00000016386	2	2	1	35	60	53
ENSMUSG00000016409	468	654	668	608	867	775
ENSMUSG00000016427	913	931	910	687	1089	869
ENSMUSG00000016477	181	173	269	111	216	203
ENSMUSG00000016481	2212	3313	2537	1261	1140	1207
ENSMUSG00000016487	8921	9915	12760	13332	13689	14345
ENSMUSG00000016493	68	291	70	169	188	269
ENSMUSG00000016494	23217	31137	25532	733	1879	2233
ENSMUSG00000016495	1504	1831	961	4414	4268	3928
ENSMUSG00000016496	673	1217	1045	4038	5025	3499
ENSMUSG00000016498	0	0	0	1	33	0
ENSMUSG00000016503	287	892	574	739	932	1063
ENSMUSG00000016510	249	324	434	381	323	308
ENSMUSG00000016520	738	925	904	554	528	971
ENSMUSG00000016526	24	8	51	141	182	123
ENSMUSG00000016528	3418	3941	4558	3532	4926	4472
ENSMUSG00000016534	7320	11181	10398	8464	8930	9988
ENSMUSG00000016541	1073	1598	1581	1395	2251	1825
ENSMUSG00000016552	480	287	533	195	422	297
ENSMUSG00000016554	1711	2105	3004	2041	2223	2562
ENSMUSG00000016559	24365	26509	30709	37406	36977	42232
ENSMUSG00000016619	1006	1135	1275	2289	2152	2866
ENSMUSG00000016624	62	79	50	637	605	544
ENSMUSG00000016637	593	393	567	370	326	514
ENSMUSG00000016664	3754	5339	5751	2291	4097	3188
ENSMUSG00000016756	1136	1474	1548	31	22	66
ENSMUSG00000016757	435	645	544	914	1210	925
ENSMUSG00000016758	135	324	346	42	121	9
ENSMUSG00000016763	315	231	721	125	273	318
ENSMUSG00000016831	1576	1662	2159	2638	2838	2679
ENSMUSG00000016833	0	2	85	54	19	26
ENSMUSG00000016918	5880	8602	6144	44	202	172
ENSMUSG00000016921	8862	10840	9319	13817	12939	15418
ENSMUSG00000016933	7207	10128	11752	5375	5624	5650
ENSMUSG00000016940	1197	1067	1280	1304	1445	1533
ENSMUSG00000016946	998	1135	820	984	948	1100
ENSMUSG00000016984	176	281	375	390	417	481
ENSMUSG00000016995	219	232	167	54	62	87
ENSMUSG00000017002	0	11	0	0	0	12
ENSMUSG00000017007	1	58	0	0	1	0
ENSMUSG00000017009	6435	7474	11586	5428	8131	10229
ENSMUSG00000017057	1228	1766	2104	299	425	680
ENSMUSG00000017119	3938	5851	4825	7747	6561	7036
ENSMUSG00000017132	1728	1575	1924	2449	2809	2477
ENSMUSG00000017144	4202	7573	5254	5442	5156	5965
ENSMUSG00000017146	5	34	106	163	125	134
ENSMUSG00000017165	30	24	1	0	0	0
ENSMUSG00000017167	979	1004	831	416	616	686
ENSMUSG00000017176	582	1034	809	1211	1281	1349
ENSMUSG00000017188	510	492	706	501	508	417
ENSMUSG00000017204	0	0	0	0	10	38
ENSMUSG00000017210	993	1315	1359	1707	2131	2162
ENSMUSG00000017221	3483	3842	4178	5030	4896	5280
ENSMUSG00000017264	1550	2206	2413	2768	2485	2443
ENSMUSG00000017286	816	1218	825	720	721	1012
ENSMUSG00000017288	630	1030	1226	1193	1509	1117
ENSMUSG00000017291	4080	6251	4876	8053	6838	8138
ENSMUSG00000017299	907	1248	858	1356	1643	1445
ENSMUSG00000017300	36	0	18	0	0	8
ENSMUSG00000017307	245	134	289	390	566	417
ENSMUSG00000017309	2772	6587	6347	73	396	548
ENSMUSG00000017311	0	0	0	0	7	0
ENSMUSG00000017314	141	447	479	738	410	456
ENSMUSG00000017316	0	13	1	0	0	0
ENSMUSG00000017344	1950	2740	1981	54	155	64
ENSMUSG00000017376	508	590	937	3892	3291	3817
ENSMUSG00000017386	1122	1247	1233	1474	1763	2227
ENSMUSG00000017390	2	126	73	115	239	154
ENSMUSG00000017400	98	90	75	69	48	160
ENSMUSG00000017404	321	469	350	605	440	720
ENSMUSG00000017405	1157	765	955	582	742	862
ENSMUSG00000017412	0	0	1	15	21	53
ENSMUSG00000017417	6186	8564	6679	73	276	262
ENSMUSG00000017418	1984	2377	2752	1886	1813	2335
ENSMUSG00000017421	3388	3890	3431	6158	5141	5861
ENSMUSG00000017428	1246	1472	1579	1999	1362	1871
ENSMUSG00000017446	1675	2798	2882	168	383	322
ENSMUSG00000017453	0	20	54	41	31	75
ENSMUSG00000017466	35421	48145	41148	17850	23655	19873
ENSMUSG00000017478	2670	2448	2353	4370	4258	5280
ENSMUSG00000017485	2967	5239	4044	4458	5360	5567
ENSMUSG00000017491	6	99	103	792	558	752
ENSMUSG00000017493	16736	19967	16787	634	1357	1164
ENSMUSG00000017499	75	159	67	50	148	102
ENSMUSG00000017548	1676	2527	2202	3554	2839	3795
ENSMUSG00000017550	38	123	156	380	142	426
ENSMUSG00000017561	648	1093	818	1011	930	1228
ENSMUSG00000017588	2	20	0	0	26	0
ENSMUSG00000017607	1230	1736	2440	612	1487	1897
ENSMUSG00000017615	2524	2985	2820	2212	3004	2784
ENSMUSG00000017631	2357	3551	4269	8628	9387	9319
ENSMUSG00000017639	297	701	859	415	616	888
ENSMUSG00000017652	147	32	257	1	68	54
ENSMUSG00000017664	534	737	862	866	1007	1096
ENSMUSG00000017667	205	335	179	624	551	709
ENSMUSG00000017670	1800	2316	2836	3328	3962	3965
ENSMUSG00000017677	10043	10512	10635	10917	10143	13103
ENSMUSG00000017679	834	1207	1416	713	959	720
ENSMUSG00000017686	1173	1698	1910	2043	2036	2297
ENSMUSG00000017692	823	683	715	722	929	1157
ENSMUSG00000017697	277	241	367	36	56	133
ENSMUSG00000017707	12885	21049	19547	8798	10750	10372
ENSMUSG00000017713	239	193	228	376	411	450
ENSMUSG00000017715	801	1041	1352	1548	1640	1889
ENSMUSG00000017716	30	38	78	57	67	206
ENSMUSG00000017718	5	96	0	77	76	106
ENSMUSG00000017721	1368	2010	1573	1838	2149	1803
ENSMUSG00000017723	66	35	37	1	15	0
ENSMUSG00000017724	2383	2353	2631	821	596	1138
ENSMUSG00000017734	161	232	248	330	438	633
ENSMUSG00000017737	54	136	140	38	4	0
ENSMUSG00000017740	36	6	58	130	163	140
ENSMUSG00000017747	667	901	753	710	710	693
ENSMUSG00000017754	4285	7452	7598	2904	3012	2784
ENSMUSG00000017756	2985	3525	3625	1685	2694	2210
ENSMUSG00000017760	2924	2980	3636	4642	6603	5342
ENSMUSG00000017764	132	194	332	247	334	324
ENSMUSG00000017765	4140	5139	4884	2822	3422	4044
ENSMUSG00000017767	0	1	25	17	0	24
ENSMUSG00000017774	11454	13708	14892	6916	8511	8670
ENSMUSG00000017776	5793	6264	5752	5716	6206	6577
ENSMUSG00000017778	161	341	262	340	333	344
ENSMUSG00000017781	2746	3075	3860	3149	3819	3604
ENSMUSG00000017801	507	877	596	851	829	882
ENSMUSG00000017802	2210	2686	2321	5825	5337	5716
ENSMUSG00000017817	2	195	125	70	107	55
ENSMUSG00000017830	480	372	415	54	111	151
ENSMUSG00000017831	2318	2095	2530	2086	1770	2240
ENSMUSG00000017837	617	1295	894	893	957	856
ENSMUSG00000017843	2888	3835	3758	2340	3009	2498
ENSMUSG00000017858	648	791	843	1022	1186	1331
ENSMUSG00000017861	3	18	108	47	177	11
ENSMUSG00000017868	1	27	0	29	4	18
ENSMUSG00000017897	183	258	297	67	32	87
ENSMUSG00000017929	1226	1256	1341	6381	5254	5920
ENSMUSG00000017943	0	0	0	39	0	23
ENSMUSG00000017969	0	5	0	0	0	0
ENSMUSG00000017978	119	367	121	0	44	91
ENSMUSG00000017999	1641	1710	2091	2769	3067	2923
ENSMUSG00000018001	4701	6996	4879	10052	10288	10204
ENSMUSG00000018008	252	296	373	22	32	22
ENSMUSG00000018012	533	551	417	117	156	533
ENSMUSG00000018040	527	844	966	1154	852	1025
ENSMUSG00000018042	8765	11605	12558	5677	8262	7663
ENSMUSG00000018068	592	812	908	1301	1133	1597
ENSMUSG00000018076	5592	7031	6222	7016	7530	8600
ENSMUSG00000018102	478	151	342	160	183	93
ENSMUSG00000018126	0	1	25	0	0	0
ENSMUSG00000018143	7510	6106	9036	12377	12262	13976
ENSMUSG00000018160	2467	3100	2495	4133	4033	4947
ENSMUSG00000018166	2176	1937	2881	16400	17864	17067
ENSMUSG00000018167	918	745	928	1425	2220	1526
ENSMUSG00000018168	0	0	0	1	15	0
ENSMUSG00000018169	707	824	997	30	105	30
ENSMUSG00000018171	1835	2047	2264	12670	8062	12401
ENSMUSG00000018189	380	470	541	645	863	831
ENSMUSG00000018196	657	1091	833	805	784	748
ENSMUSG00000018199	1114	1512	1583	1789	1585	1593
ENSMUSG00000018209	1426	1291	1389	2865	2946	3152
ENSMUSG00000018217	4031	3884	3823	2514	3955	3671
ENSMUSG00000018238	43	84	102	66	0	24
ENSMUSG00000018239	203	191	35	270	215	236
ENSMUSG00000018263	31	22	25	6	0	0
ENSMUSG00000018286	1396	1710	2006	3113	3531	3423
ENSMUSG00000018287	577	739	1026	1265	1176	1151
ENSMUSG00000018293	6540	6914	7922	8516	9238	9805
ENSMUSG00000018322	1072	1915	1719	1910	2338	2394
ENSMUSG00000018326	4198	5885	5555	5520	5425	5047
ENSMUSG00000018334	1636	2291	1913	1200	1412	1350
ENSMUSG00000018339	129	366	339	2510	2686	2792
ENSMUSG00000018340	3251	4710	4336	6151	6574	6333
ENSMUSG00000018341	0	91	70	4	81	55
ENSMUSG00000018347	103	385	357	402	616	449
ENSMUSG00000018362	211	209	251	259	386	328
ENSMUSG00000018363	1877	2571	2495	3495	2926	3555
ENSMUSG00000018372	701	815	820	1732	1603	1870
ENSMUSG00000018381	932	1033	1050	64	191	120
ENSMUSG00000018387	68	201	66	420	373	414
ENSMUSG00000018395	703	938	1075	2463	2392	2183
ENSMUSG00000018398	3039	4347	3520	9881	10587	10268
ENSMUSG00000018401	989	1194	1035	2092	2196	2278
ENSMUSG00000018405	353	390	169	411	589	455
ENSMUSG00000018411	585	502	922	3194	3218	3349
ENSMUSG00000018412	2370	3802	3583	5310	4930	5358
ENSMUSG00000018415	1516	2267	2508	1026	2037	1816
ENSMUSG00000018417	4737	5116	4507	5522	6034	6479
ENSMUSG00000018425	741	1151	991	1586	1010	1454
ENSMUSG00000018427	1548	2342	2219	1942	1532	2458
ENSMUSG00000018428	1388	1681	1917	2569	2955	3206
ENSMUSG00000018433	377	655	623	667	569	950
ENSMUSG00000018442	810	1171	1230	1204	1294	1509
ENSMUSG00000018446	447	1274	1078	1204	1426	1131
ENSMUSG00000018449	638	952	944	1780	1578	1771
ENSMUSG00000018451	1	46	0	0	0	32
ENSMUSG00000018459	0	33	52	0	0	0
ENSMUSG00000018470	36	0	51	0	12	149
ENSMUSG00000018474	6053	6407	6256	8866	9591	9967
ENSMUSG00000018476	20759	13792	11760	12083	12282	14166
ENSMUSG00000018481	1184	1632	1668	4269	3410	4353
ENSMUSG00000018486	77	33	102	0	1	2
ENSMUSG00000018500	166	230	117	42	99	55
ENSMUSG00000018501	5969	7673	7263	10030	9179	10191
ENSMUSG00000018507	167	304	346	1923	2328	2107
ENSMUSG00000018509	161	229	100	566	592	826
ENSMUSG00000018537	1065	1327	1584	2839	2441	2702
ENSMUSG00000018541	460	817	851	1042	1425	1300
ENSMUSG00000018543	1	105	60	78	17	109
ENSMUSG00000018547	2159	2969	3536	2533	2205	2662
ENSMUSG00000018548	906	1084	1225	1861	1928	2269
ENSMUSG00000018554	0	24	60	14	0	0
ENSMUSG00000018559	1824	2138	2709	2165	2538	2664
ENSMUSG00000018565	432	792	1097	698	1100	693
ENSMUSG00000018566	87	56	161	47	94	69
ENSMUSG00000018567	4947	5491	5099	6849	7540	7470
ENSMUSG00000018569	20	0	0	0	0	0
ENSMUSG00000018570	33	37	126	141	209	133
ENSMUSG00000018572	4991	4018	4373	4920	5520	6104
ENSMUSG00000018574	3173	3188	3363	4878	5035	5642
ENSMUSG00000018581	0	0	35	1	63	19
ENSMUSG00000018583	2243	2747	2882	2784	3040	3175
ENSMUSG00000018585	1407	1466	1696	788	1364	1152
ENSMUSG00000018593	64268	81377	66081	4386	11827	10098
ENSMUSG00000018595	0	0	3	14	0	0
ENSMUSG00000018599	238	271	227	501	255	435
ENSMUSG00000018604	1225	1849	1412	918	1436	1315
ENSMUSG00000018648	108	95	247	13	47	3
ENSMUSG00000018651	440	654	441	345	627	651
ENSMUSG00000018654	58	47	81	0	0	1
ENSMUSG00000018659	233	350	598	152	380	336
ENSMUSG00000018661	1125	1359	1312	1575	1661	1262
ENSMUSG00000018666	1929	3939	3392	3586	3709	3758
ENSMUSG00000018669	1256	1499	1950	1527	1444	1806
ENSMUSG00000018672	1207	1589	1418	616	473	551
ENSMUSG00000018677	1004	1151	1844	1158	1573	1351
ENSMUSG00000018678	481	944	955	1124	1450	951
ENSMUSG00000018697	507	647	726	1519	1464	1304
ENSMUSG00000018707	12825	16285	15679	24150	22631	22730
ENSMUSG00000018727	50	1	0	14	0	26
ENSMUSG00000018733	106	148	133	291	207	193
ENSMUSG00000018736	3105	3499	3400	3156	3764	3724
ENSMUSG00000018740	664	399	485	1512	1594	1711
ENSMUSG00000018750	4767	6585	6202	3509	4341	3702
ENSMUSG00000018752	31	37	76	18	11	0
ENSMUSG00000018761	1063	1241	1545	1414	1613	1521
ENSMUSG00000018765	4055	3687	5188	7226	7330	7094
ENSMUSG00000018770	2143	2256	2467	4039	4289	4892
ENSMUSG00000018774	1215	2053	1837	1998	1983	2596
ENSMUSG00000018796	449	971	1234	898	1088	1495
ENSMUSG00000018800	696	850	875	1921	1621	1875
ENSMUSG00000018809	276	344	265	431	529	285
ENSMUSG00000018819	1664	1430	1493	39	104	104
ENSMUSG00000018820	1318	1888	1765	4113	4143	3588
ENSMUSG00000018821	708	890	1280	205	627	413
ENSMUSG00000018822	1	30	40	0	168	65
ENSMUSG00000018830	271	809	1673	761	1611	1277
ENSMUSG00000018841	305	475	535	375	508	387
ENSMUSG00000018845	550	1144	1601	60	78	97
ENSMUSG00000018846	1933	2795	3237	4301	4127	4870
ENSMUSG00000018848	974	1665	1444	1470	1299	1763
ENSMUSG00000018849	185	258	406	220	301	453
ENSMUSG00000018858	546	606	448	677	1130	788
ENSMUSG00000018861	308	535	705	2756	2751	2678
ENSMUSG00000018862	0	21	0	0	20	0
ENSMUSG00000018868	2	21	1	27	75	69
ENSMUSG00000018882	277	534	510	649	531	676
ENSMUSG00000018899	21993	21027	21866	8611	14208	13507
ENSMUSG00000018900	2471	2206	1899	1680	2047	1792
ENSMUSG00000018906	832	880	833	37	237	81
ENSMUSG00000018907	58	406	343	342	870	1191
ENSMUSG00000018909	12286	17094	14088	4687	5602	5015
ENSMUSG00000018920	419	720	1347	436	676	782
ENSMUSG00000018921	1053	1225	1493	1395	1650	1477
ENSMUSG00000018923	76	152	56	102	190	157
ENSMUSG00000018924	0	42	41	0	51	16
ENSMUSG00000018927	325	451	487	6	11	2
ENSMUSG00000018930	0	18	0	0	0	0
ENSMUSG00000018931	220	455	222	565	697	773
ENSMUSG00000018932	2691	1596	2461	2124	2170	2708
ENSMUSG00000018965	2889	3222	3471	4449	4981	5196
ENSMUSG00000018974	2052	1990	2005	3331	3613	3829
ENSMUSG00000018983	267	175	441	53	185	292
ENSMUSG00000018986	653	495	872	90	177	122
ENSMUSG00000018995	121	83	188	320	252	209
ENSMUSG00000018999	443	953	778	1395	1885	1961
ENSMUSG00000019027	23	189	144	40	43	111
ENSMUSG00000019039	1511	1782	1664	2925	3245	3333
ENSMUSG00000019054	1515	1689	1845	1285	1350	1394
ENSMUSG00000019055	3148	3585	4040	2439	3150	3260
ENSMUSG00000019066	2142	1813	2026	1875	2456	2004
ENSMUSG00000019080	2	83	24	104	63	154
ENSMUSG00000019082	1605	1548	1297	1353	1524	1401
ENSMUSG00000019087	4323	5347	5323	6298	6828	7112
ENSMUSG00000019088	1109	1316	1039	1038	1327	1002
ENSMUSG00000019102	128	581	758	404	608	703
ENSMUSG00000019122	836	561	677	10	13	4
ENSMUSG00000019124	349	630	439	824	913	1172
ENSMUSG00000019132	9107	11692	10319	14616	14267	16807
ENSMUSG00000019139	3240	2877	3806	3580	3693	4840
ENSMUSG00000019143	1226	1485	1470	1716	1806	1936
ENSMUSG00000019158	522	201	316	322	346	424
ENSMUSG00000019173	6637	7566	9078	5497	7167	7162
ENSMUSG00000019178	0	66	36	23	74	21
ENSMUSG00000019179	1825	1852	2534	3049	3589	3601
ENSMUSG00000019188	2007	2273	2986	1714	1889	1946
ENSMUSG00000019189	2668	3976	3517	1265	1984	1801
ENSMUSG00000019194	2750	3383	4597	159	476	456
ENSMUSG00000019210	1331	1632	1946	2384	2505	3432
ENSMUSG00000019214	112	72	256	328	219	448
ENSMUSG00000019230	0	0	0	0	12	0
ENSMUSG00000019235	31	105	99	9	4	40
ENSMUSG00000019254	3260	4063	3978	6314	5795	6645
ENSMUSG00000019256	2024	3376	3058	3021	2784	3522
ENSMUSG00000019261	784	1025	1236	1757	1486	1624
ENSMUSG00000019278	2626	3495	1473	28	77	64
ENSMUSG00000019295	275	504	250	572	660	875
ENSMUSG00000019297	609	590	763	1093	820	604
ENSMUSG00000019301	0	0	64	44	1	0
ENSMUSG00000019302	1982	3195	3014	16098	16331	16420
ENSMUSG00000019303	145	167	103	282	154	174
ENSMUSG00000019312	282	508	564	128	226	131
ENSMUSG00000019320	96	216	269	452	429	369
ENSMUSG00000019326	131	238	427	23	164	243
ENSMUSG00000019338	876	1040	1173	2665	2853	3206
ENSMUSG00000019359	43	145	80	64	70	470
ENSMUSG00000019362	1282	2088	2461	2167	1954	2378
ENSMUSG00000019368	95	159	236	21	266	248
ENSMUSG00000019370	5309	6458	5768	3564	5683	4055
ENSMUSG00000019373	640	976	880	1521	1453	1324
ENSMUSG00000019428	4717	5846	6876	6434	8436	7700
ENSMUSG00000019432	5097	6028	5853	12060	11389	12955
ENSMUSG00000019433	1137	993	1278	1179	1577	1759
ENSMUSG00000019437	802	738	676	671	876	1138
ENSMUSG00000019461	1657	2747	2988	1546	1961	1334
ENSMUSG00000019464	352	412	274	320	287	207
ENSMUSG00000019467	2884	3411	2385	3622	3411	2930
ENSMUSG00000019470	1417	1811	2119	2902	3475	3198
ENSMUSG00000019471	3790	4701	5223	5448	6565	6152
ENSMUSG00000019478	175	267	258	368	528	333
ENSMUSG00000019487	5882	5191	4345	5530	4558	5248
ENSMUSG00000019494	1117	1506	1793	2022	2216	2104
ENSMUSG00000019505	15432	15104	18676	28237	27161	31091
ENSMUSG00000019518	1467	1841	2308	2288	2391	2812
ENSMUSG00000019528	214	420	302	442	387	514
ENSMUSG00000019539	9045	9823	8912	551	1001	728
ENSMUSG00000019558	3103	3557	2818	4581	4790	6200
ENSMUSG00000019564	290	246	226	314	517	588
ENSMUSG00000019577	1003	1377	2150	1200	1394	1722
ENSMUSG00000019578	1157	1252	1502	1293	1719	1823
ENSMUSG00000019579	654	1096	1038	681	601	772
ENSMUSG00000019590	1368	2127	2347	142	378	278
ENSMUSG00000019647	2766	4066	3911	1364	1698	1887
ENSMUSG00000019659	441	559	671	418	506	549
ENSMUSG00000019689	228	281	189	193	236	230
ENSMUSG00000019699	1327	2326	1893	3144	3481	3382
ENSMUSG00000019710	1296	2245	1880	3508	3437	3511
ENSMUSG00000019715	1031	1258	1762	1633	2311	1557
ENSMUSG00000019718	117	373	497	429	291	335
ENSMUSG00000019726	1307	1672	1766	16590	15605	14996
ENSMUSG00000019731	1372	1751	2307	1648	2086	2276
ENSMUSG00000019732	30	20	108	51	0	32
ENSMUSG00000019734	452	407	197	491	360	411
ENSMUSG00000019737	0	12	2	107	74	151
ENSMUSG00000019738	429	455	271	440	578	502
ENSMUSG00000019761	1235	5163	6164	765	7181	5961
ENSMUSG00000019762	0	0	0	10	0	0
ENSMUSG00000019763	158	270	298	586	501	689
ENSMUSG00000019767	214	319	140	0	20	15
ENSMUSG00000019768	289	695	475	33	199	162
ENSMUSG00000019773	80	133	257	233	181	270
ENSMUSG00000019774	305	217	246	235	526	229
ENSMUSG00000019775	54	11	58	0	0	1
ENSMUSG00000019777	1409	2518	2368	2727	2987	3326
ENSMUSG00000019779	6	109	70	9	60	16
ENSMUSG00000019782	172	222	79	199	176	197
ENSMUSG00000019789	76	15	85	775	950	604
ENSMUSG00000019790	1897	2169	2503	4972	4337	5035
ENSMUSG00000019791	134	156	70	76	75	121
ENSMUSG00000019792	91	265	2	178	206	214
ENSMUSG00000019794	1023	1151	836	1071	1141	1313
ENSMUSG00000019795	976	1139	1470	1727	1823	1980
ENSMUSG00000019796	140	1	0	27	67	85
ENSMUSG00000019797	219	320	347	516	512	613
ENSMUSG00000019802	3634	5022	4859	5737	5043	5723
ENSMUSG00000019804	1803	2514	2872	2694	2578	2798
ENSMUSG00000019806	424	734	603	898	924	917
ENSMUSG00000019808	75	199	111	138	123	131
ENSMUSG00000019809	515	676	616	558	604	574
ENSMUSG00000019810	385	411	758	944	1098	1476
ENSMUSG00000019813	18	311	336	168	65	158
ENSMUSG00000019814	669	1081	817	1372	1240	1695
ENSMUSG00000019817	1401	1724	1514	14036	10904	12095
ENSMUSG00000019818	4693	5537	5803	6048	6725	7555
ENSMUSG00000019820	9901	14799	13653	10456	11226	11620
ENSMUSG00000019822	1565	1670	1940	4698	4306	4323
ENSMUSG00000019823	2401	2213	1721	8154	8759	7899
ENSMUSG00000019826	363	500	320	956	1289	816
ENSMUSG00000019831	123	94	272	92	134	119
ENSMUSG00000019832	30	174	345	267	477	515
ENSMUSG00000019836	0	1	35	51	5	24
ENSMUSG00000019837	287	425	408	540	941	632
ENSMUSG00000019838	283	119	121	78	112	119
ENSMUSG00000019841	1692	1855	1578	6150	4595	5157
ENSMUSG00000019842	535	674	705	1372	1085	1482
ENSMUSG00000019843	2991	4198	4105	3728	3595	3829
ENSMUSG00000019845	3	50	56	98	60	354
ENSMUSG00000019846	9105	11056	10718	5146	5061	5618
ENSMUSG00000019848	37	6	58	16	47	91
ENSMUSG00000019849	386	939	1666	924	1113	1267
ENSMUSG00000019850	4791	4808	5097	711	1404	1907
ENSMUSG00000019851	3480	3875	6280	1497	3165	3831
ENSMUSG00000019852	5	64	19	224	523	405
ENSMUSG00000019853	139	351	266	49	155	9
ENSMUSG00000019854	1034	970	958	1796	1940	1649
ENSMUSG00000019856	206	389	351	34	35	1
ENSMUSG00000019857	246	394	357	447	482	664
ENSMUSG00000019861	996	1694	1282	1070	1219	1318
ENSMUSG00000019863	179	148	264	175	68	384
ENSMUSG00000019864	216	161	182	213	267	257
ENSMUSG00000019865	0	0	0	0	12	26
ENSMUSG00000019866	788	1481	1573	613	1356	1070
ENSMUSG00000019868	370	679	685	509	761	796
ENSMUSG00000019872	540	783	969	1228	1424	1592
ENSMUSG00000019873	5142	6393	5816	5361	5168	6555
ENSMUSG00000019874	7	69	148	480	728	648
ENSMUSG00000019876	2	70	8	236	253	272
ENSMUSG00000019877	5014	7365	6074	7146	7571	7944
ENSMUSG00000019878	264	399	798	589	530	486
ENSMUSG00000019880	36	85	58	35	27	27
ENSMUSG00000019883	366	387	444	536	911	570
ENSMUSG00000019889	2068	2797	3468	705	1258	1291
ENSMUSG00000019890	539	382	1115	181	350	639
ENSMUSG00000019891	190	253	406	582	524	375
ENSMUSG00000019892	0	0	1	25	0	0
ENSMUSG00000019894	18	71	208	1865	1737	1811
ENSMUSG00000019897	1042	1179	1019	1289	1531	1600
ENSMUSG00000019899	22564	28949	17991	368	867	469
ENSMUSG00000019906	1	115	21	14	19	53
ENSMUSG00000019907	4147	5087	4315	4759	4666	5370
ENSMUSG00000019916	1766	2934	2704	1378	1445	1902
ENSMUSG00000019917	637	1445	1212	537	860	862
ENSMUSG00000019920	2796	3472	3320	3220	2673	3358
ENSMUSG00000019923	987	1532	1134	1661	1857	1909
ENSMUSG00000019927	264	470	967	512	597	515
ENSMUSG00000019929	208035	263079	181878	2047	6270	3003
ENSMUSG00000019932	47	36	121	0	22	37
ENSMUSG00000019936	35	0	0	0	0	0
ENSMUSG00000019942	1	36	151	22	58	63
ENSMUSG00000019943	4963	6447	5373	4365	3979	4639
ENSMUSG00000019944	320	674	712	8	228	88
ENSMUSG00000019945	0	0	0	0	5	8
ENSMUSG00000019947	3320	2598	2865	5531	4957	5394
ENSMUSG00000019948	105	345	188	199	362	230
ENSMUSG00000019951	838	951	1322	1769	1727	1473
ENSMUSG00000019952	450	601	790	865	992	433
ENSMUSG00000019960	3325	3996	6212	4662	5408	5431
ENSMUSG00000019961	3026	4729	4066	5669	5445	6239
ENSMUSG00000019966	3113	4770	3987	199	422	626
ENSMUSG00000019969	1836	2053	2043	2408	2493	2164
ENSMUSG00000019970	12380	10231	19417	4162	5185	7172
ENSMUSG00000019971	270	344	553	871	710	1063
ENSMUSG00000019975	1132	1093	1323	546	683	842
ENSMUSG00000019977	904	1239	1658	1966	2037	2281
ENSMUSG00000019978	10487	14575	12377	8496	9190	8647
ENSMUSG00000019979	922	1611	1585	2455	2205	1813
ENSMUSG00000019982	0	4	2	11	54	31
ENSMUSG00000019984	1542	1416	1065	1350	1618	1836
ENSMUSG00000019986	429	585	574	1081	957	1260
[truncated: 19,625 more rows]
